# Supplementary material for: Study on the effect of chlorogenic acid on the antimicrobial effect, physical properties and model accuracy of alginate impression materials
Source: PeerJ journal article supplement (doi:10.7717/peerj.18228), 2024-10-31
Supplement: Chlorogenic_acid_intervention_group_accuracy.pdf [file Chlorogenic_acid_intervention_group_accuracy.pdf]

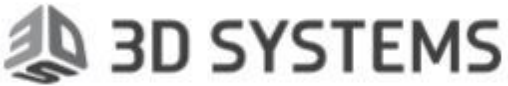

|              |                |
|--------------|----------------|
| Product Name | [Product Name] |
| Part Name    | [Part Name]    |
| Part Number  | [Part Number]  |
| Department   | [Department]   |
| Inspector    | [Inspector]    |
| Date         | Jul 18, 2023   |
| Unit         | mm             |

**Disclaimer**

The results of this analysis and forecastings are believed to be reliable but are not to be construed as providing a warranty, including any warranty of merchantability or fitness for purpose, or representation for which 3D Systems, Inc. assumes legal responsibility. Users should undertake sufficient verification and iterative testing to determine the suitability of any information presented. Nothing herein is to be taken as permission, inducement or recommendation by 3D Systems, Inc. to practice any patented invention without a license or to in any way infringe upon the intellectual property rights of any other party.

# 结果数据 - 1 : 参考数据 - 初始

Results data-1:Reference data-Initial

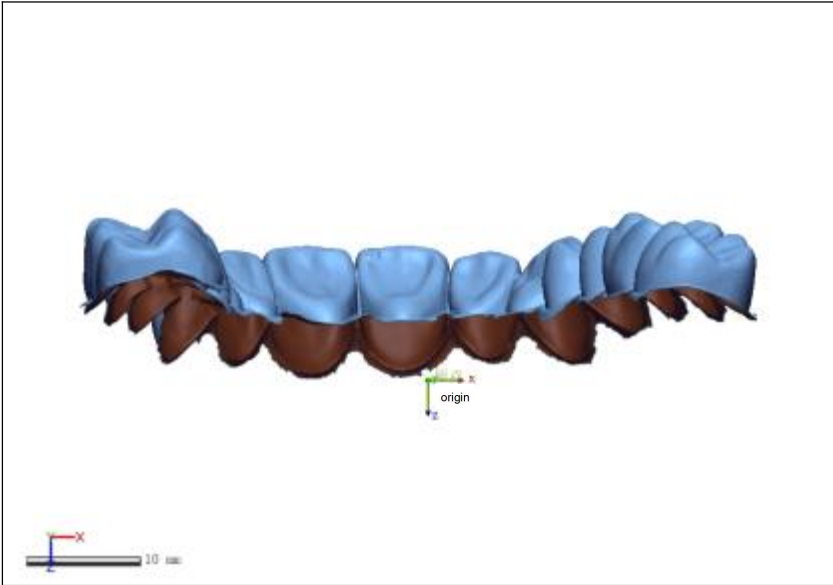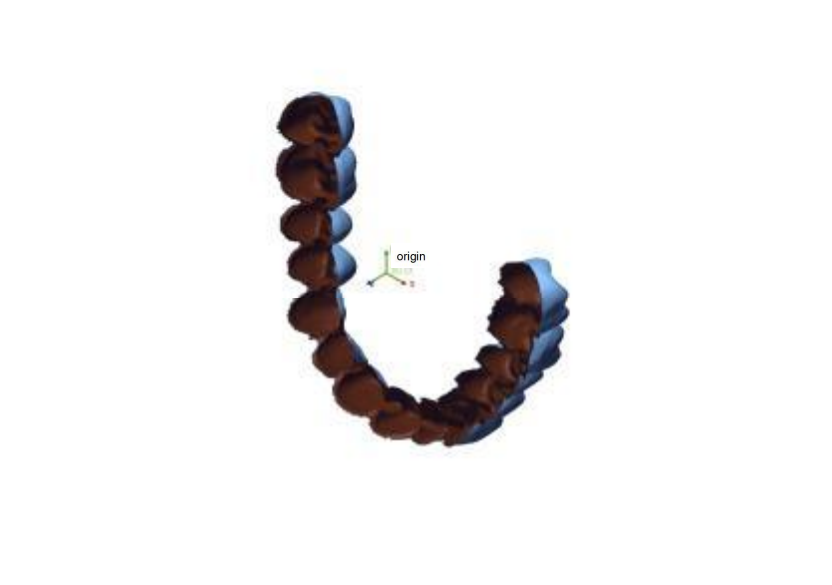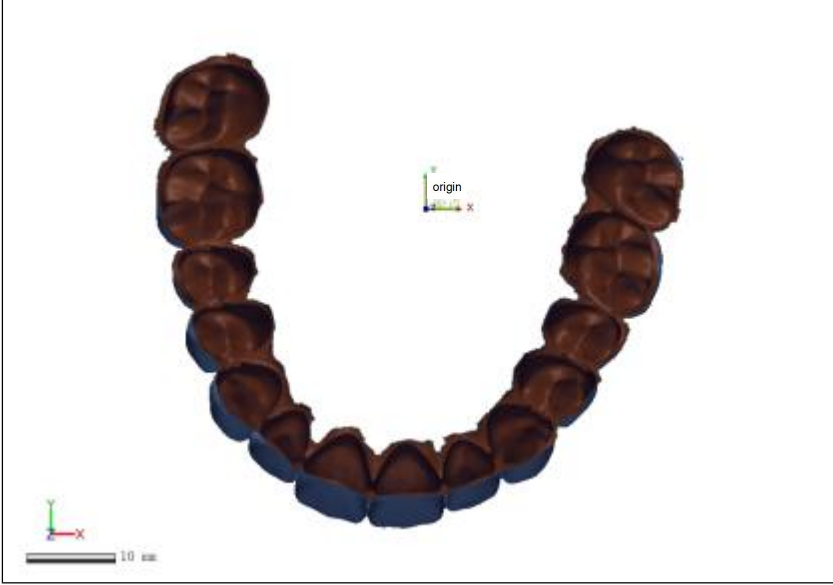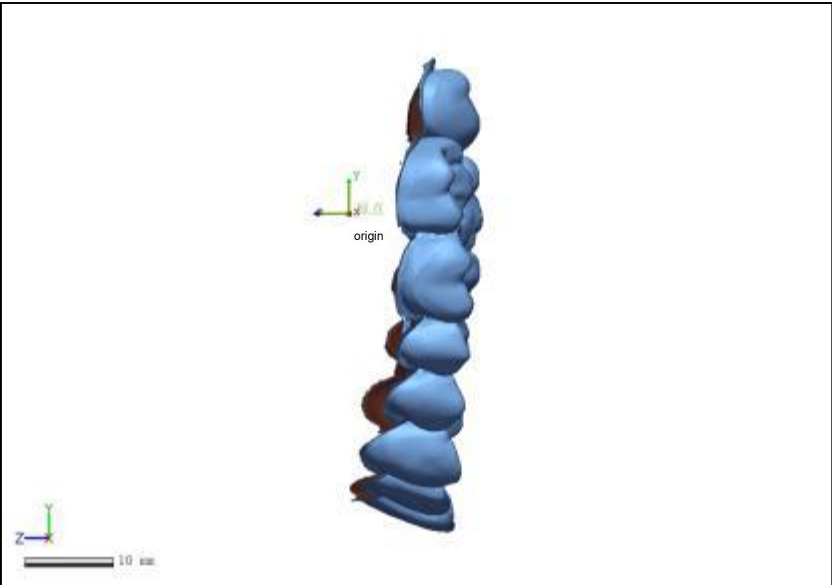

|              |                |
|--------------|----------------|
| Product Name | [Product Name] |
| Part Name    | [Part Name]    |

|            |              |
|------------|--------------|
| Department | [Department] |
| Inspector  | [Inspector]  |

|      |              |
|------|--------------|
| Date | Jul 18, 2023 |
| Unit | mm           |

# 结果数据 - 1 : 测试数据 - 绿5

Results data-1:Test Data-Chlorogenic acid5

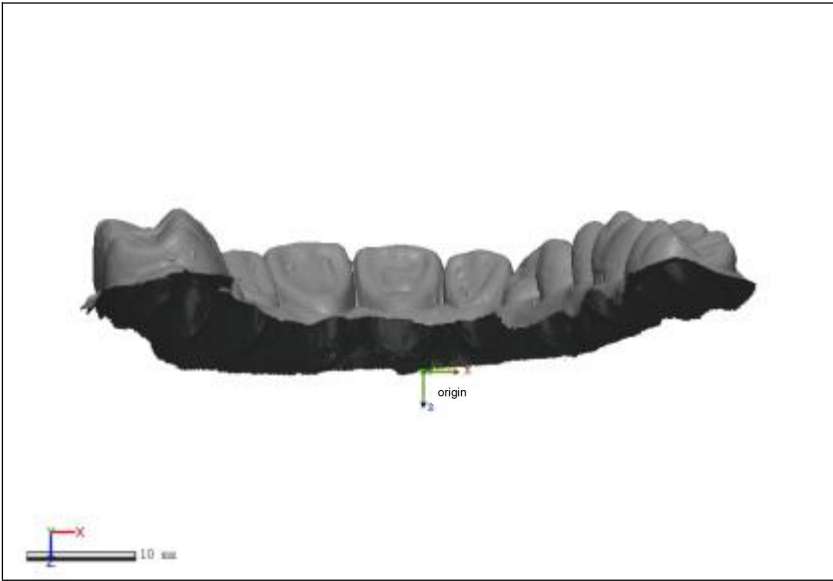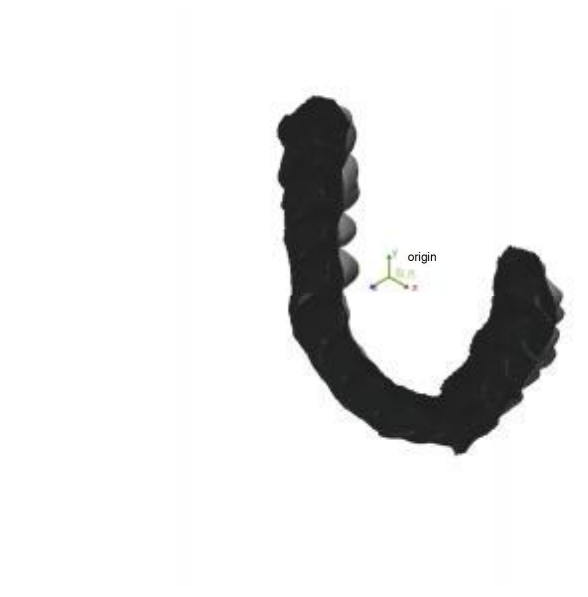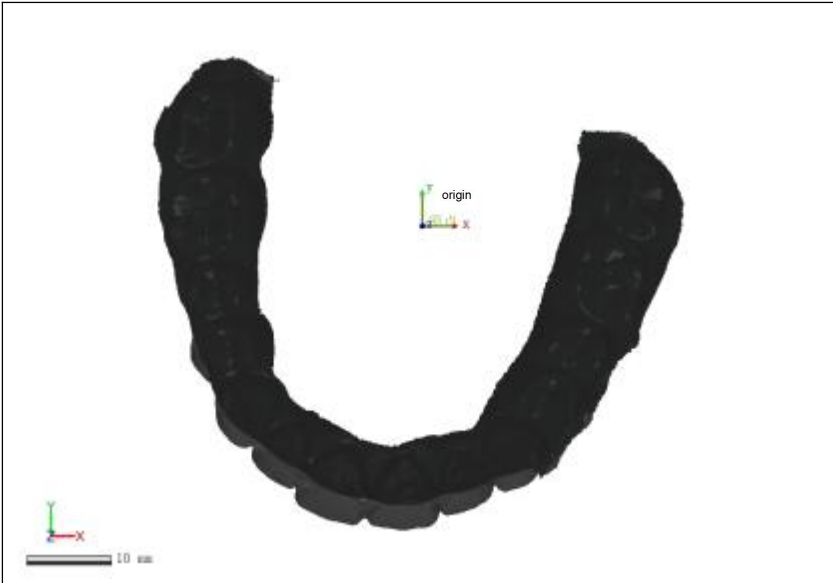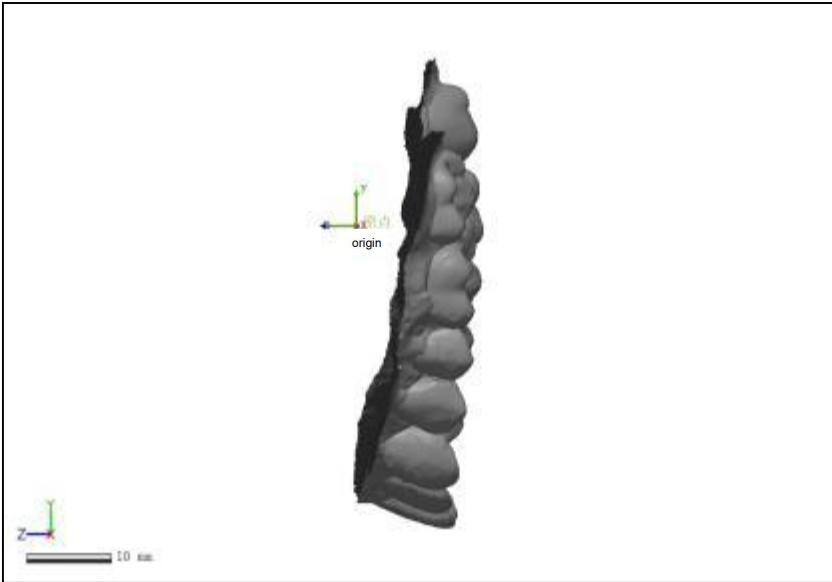

|              |                |
|--------------|----------------|
| Product Name | [Product Name] |
| Part Name    | [Part Name]    |

|            |              |
|------------|--------------|
| Department | [Department] |
| Inspector  | [Inspector]  |

|      |              |
|------|--------------|
| Date | Jul 18, 2023 |
| Unit | mm           |

# 结果数据 - 1 : 初始对齐1

Results data-1:Initial alignment1

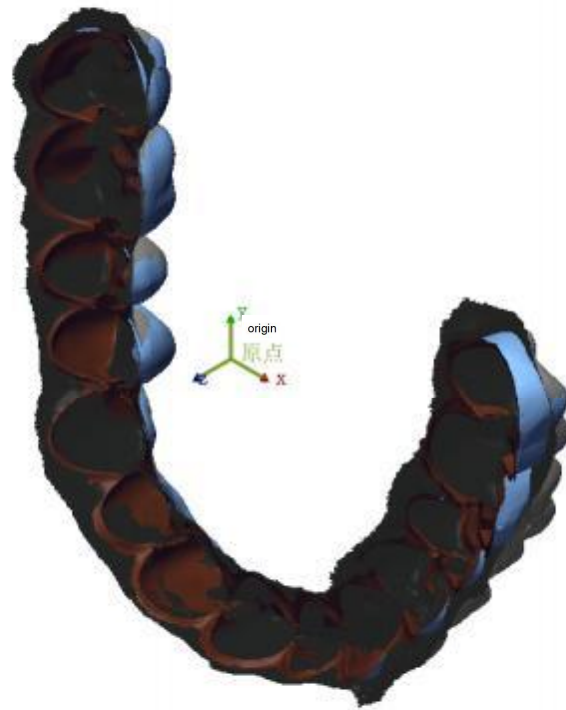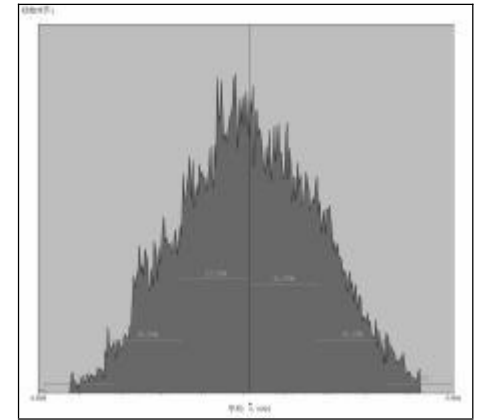

|                    |         |
|--------------------|---------|
| Minimum            | -0.4772 |
| Maximum            | 0.4774  |
| Average            | 0.0093  |
| RMS                | 0.1871  |
| Standard deviation | 0.1869  |
| Dispersion         | 0.0349  |
| +Average           | 0.1578  |
| -Average           | -0.1472 |

|              |                |
|--------------|----------------|
| Product Name | [Product Name] |
| Part Name    | [Part Name]    |

|            |              |
|------------|--------------|
| Department | [Department] |
| Inspector  | [Inspector]  |

|      |              |
|------|--------------|
| Date | Jul 18, 2023 |
| Unit | mm           |

# 结果数据 - 1 : 最佳拟合对齐1

Results data-1:Best-fit alignment1

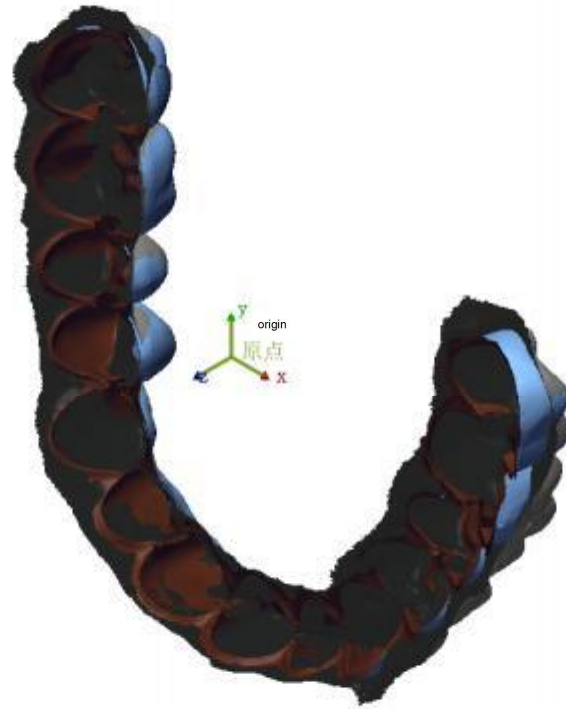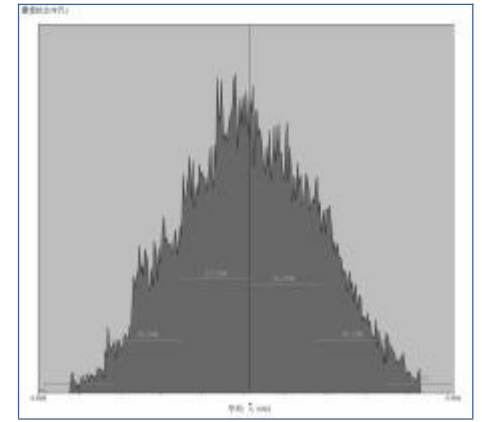

|                    |         |
|--------------------|---------|
| Minimum            | -0.4772 |
| Maximum            | 0.4774  |
| Average            | 0.0093  |
| RMS                | 0.1871  |
| Standard deviation | 0.1869  |
| Dispersion         | 0.0349  |
| +Average           | 0.1578  |
| -Average           | -0.1472 |

|              |                |
|--------------|----------------|
| Product Name | [Product Name] |
| Part Name    | [Part Name]    |

|            |              |
|------------|--------------|
| Department | [Department] |
| Inspector  | [Inspector]  |

|      |              |
|------|--------------|
| Date | Jul 18, 2023 |
| Unit | mm           |

# 结果数据 - 1 : 初始对齐2

Results data-1:Initial alignment2

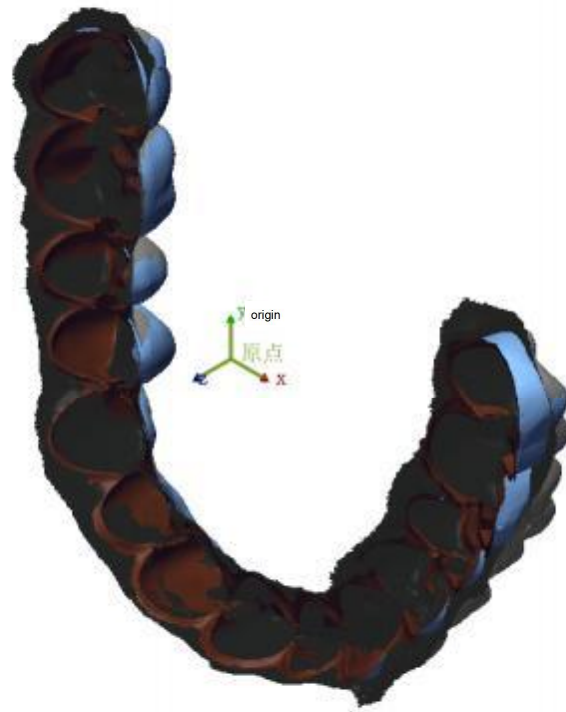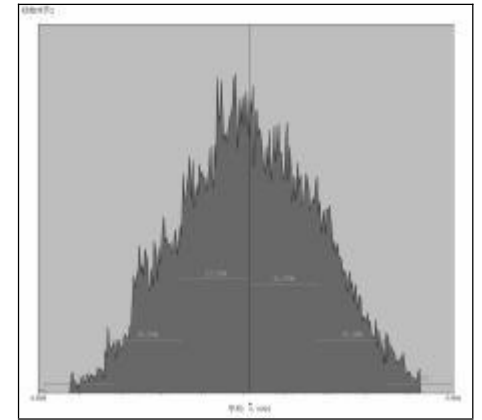

|                    |         |
|--------------------|---------|
| Minimum            | -0.4772 |
| Maximum            | 0.4774  |
| Average            | 0.0093  |
| RMS                | 0.1871  |
| Standard deviation | 0.1869  |
| Dispersion         | 0.0349  |
| +Average           | 0.1578  |
| -Average           | -0.1472 |

|              |                |
|--------------|----------------|
| Product Name | [Product Name] |
| Part Name    | [Part Name]    |

|            |              |
|------------|--------------|
| Department | [Department] |
| Inspector  | [Inspector]  |

|      |              |
|------|--------------|
| Date | Jul 18, 2023 |
| Unit | mm           |

# 结果数据 - 1 : 最佳拟合对齐2

Results data-1:Best-fit alignment2

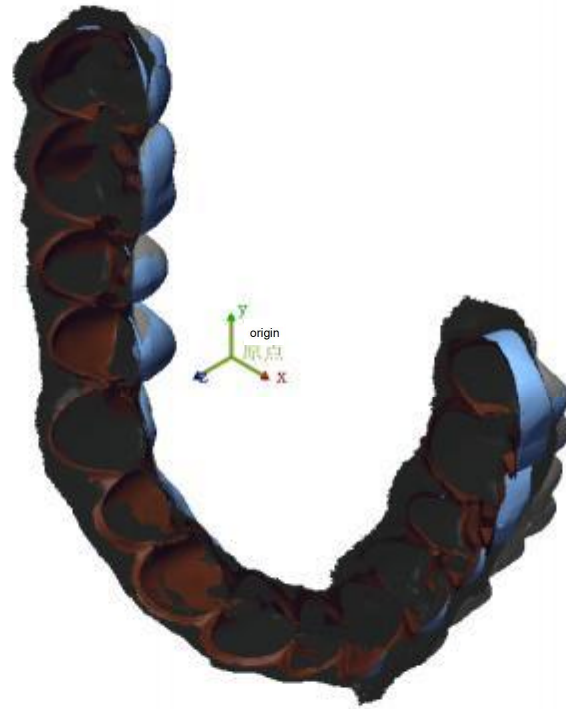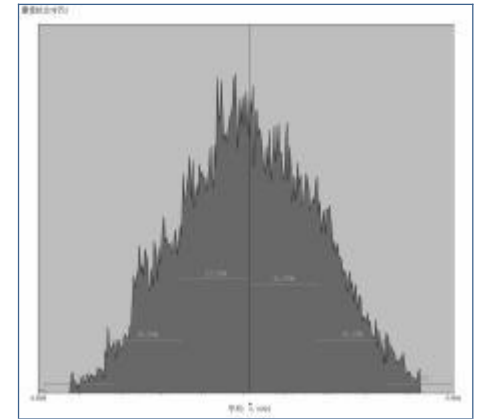

|                    |         |
|--------------------|---------|
| Minimum            | -0.4772 |
| Maximum            | 0.4774  |
| Average            | 0.0093  |
| RMS                | 0.1871  |
| Standard deviation | 0.1869  |
| Dispersion         | 0.0349  |
| +Average           | 0.1578  |
| -Average           | -0.1472 |

|              |                |
|--------------|----------------|
| Product Name | [Product Name] |
| Part Name    | [Part Name]    |

|            |              |
|------------|--------------|
| Department | [Department] |
| Inspector  | [Inspector]  |

|      |              |
|------|--------------|
| Date | Jul 18, 2023 |
| Unit | mm           |

# 结果数据 - 1 : 初始对齐3

Results data-1:Initial alignment3

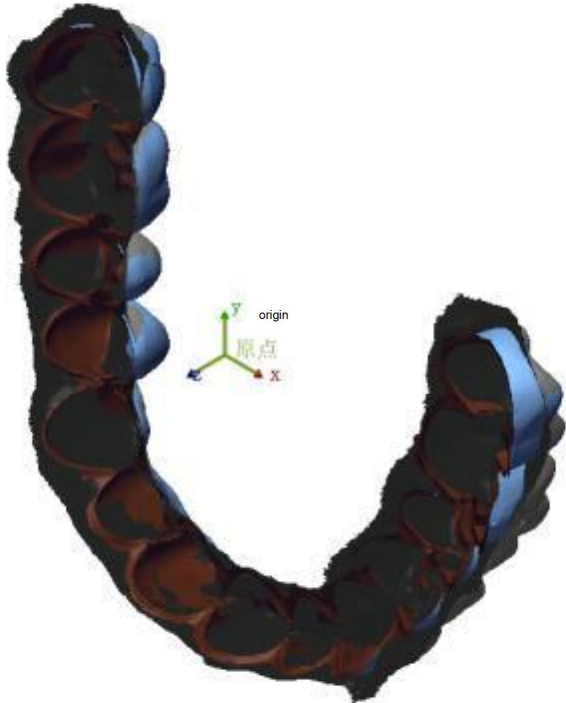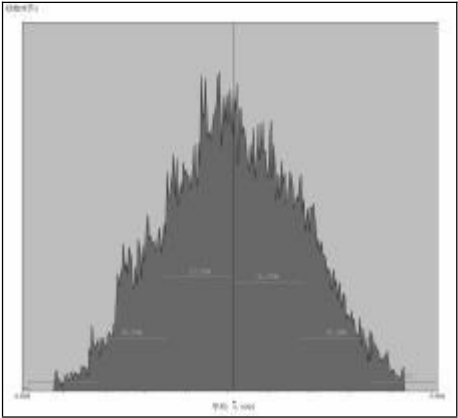

|                    |         |
|--------------------|---------|
| Minimum            | -0.4772 |
| Maximum            | 0.4774  |
| Average            | 0.0093  |
| RMS                | 0.1871  |
| Standard deviation | 0.1869  |
| Dispersion         | 0.0349  |
| +Average           | 0.1578  |
| -Average           | -0.1472 |

|              |                |
|--------------|----------------|
| Product Name | [Product Name] |
| Part Name    | [Part Name]    |

|            |              |
|------------|--------------|
| Department | [Department] |
| Inspector  | [Inspector]  |

|      |              |
|------|--------------|
| Date | Jul 18, 2023 |
| Unit | mm           |



# 结果数据 - 1 : 最佳拟合对齐3

Results data-1:Best-fit alignment3

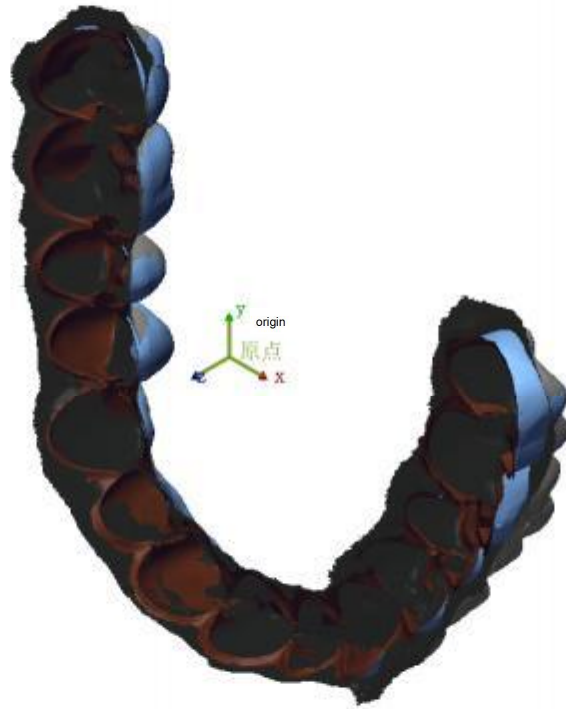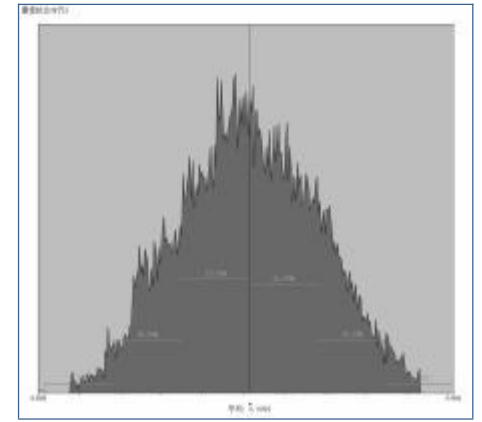

|                    |         |
|--------------------|---------|
| Minimum            | -0.4772 |
| Maximum            | 0.4774  |
| Average            | 0.0093  |
| RMS                | 0.1871  |
| Standard deviation | 0.1869  |
| Dispersion         | 0.0349  |
| +Average           | 0.1578  |
| -Average           | -0.1472 |

|              |                |
|--------------|----------------|
| Product Name | [Product Name] |
| Part Name    | [Part Name]    |

|            |              |
|------------|--------------|
| Department | [Department] |
| Inspector  | [Inspector]  |

|      |              |
|------|--------------|
| Date | Jul 18, 2023 |
| Unit | mm           |

# 结果数据 - 1 : 初始对齐4

Results data-1:Initial alignment4

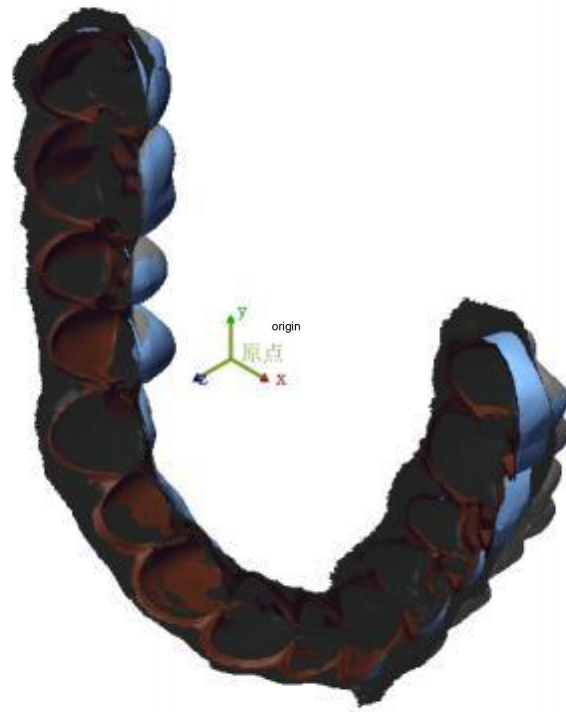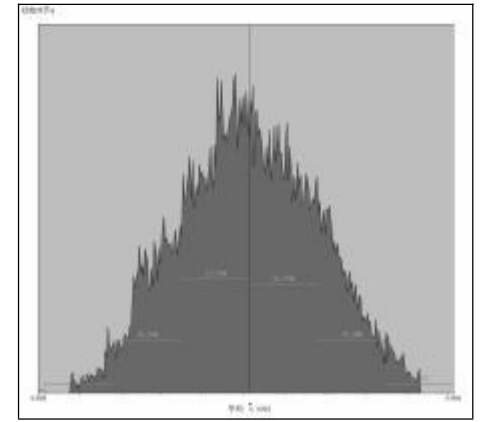

|                    |         |
|--------------------|---------|
| Minimum            | -0.4772 |
| Maximum            | 0.4774  |
| Average            | 0.0093  |
| RMS                | 0.1871  |
| Standard deviation | 0.1869  |
| Dispersion         | 0.0349  |
| +Average           | 0.1578  |
| -Average           | -0.1472 |

|              |                |
|--------------|----------------|
| Product Name | [Product Name] |
| Part Name    | [Part Name]    |

|            |              |
|------------|--------------|
| Department | [Department] |
| Inspector  | [Inspector]  |

|      |              |
|------|--------------|
| Date | Jul 18, 2023 |
| Unit | mm           |

# 结果数据 - 1 : 最佳拟合对齐4

Results data-1:Best-fit alignment4

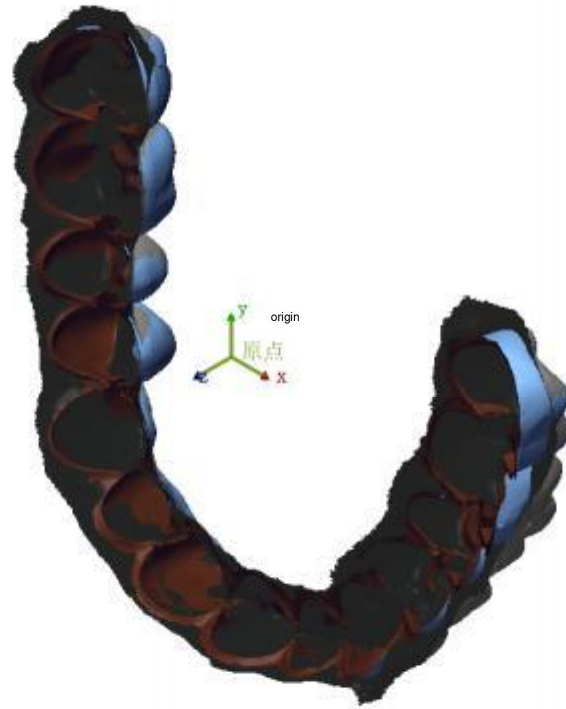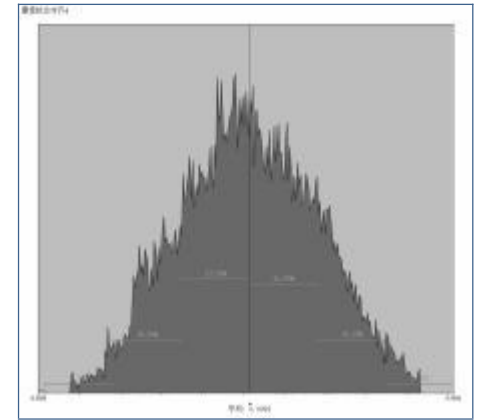

|                    |         |
|--------------------|---------|
| Minimum            | -0.4772 |
| Maximum            | 0.4774  |
| Average            | 0.0093  |
| RMS                | 0.1871  |
| Standard deviation | 0.1869  |
| Dispersion         | 0.0349  |
| +Average           | 0.1578  |
| -Average           | -0.1472 |

|              |                |
|--------------|----------------|
| Product Name | [Product Name] |
| Part Name    | [Part Name]    |

|            |              |
|------------|--------------|
| Department | [Department] |
| Inspector  | [Inspector]  |

|      |              |
|------|--------------|
| Date | Jul 18, 2023 |
| Unit | mm           |

# 结果数据 - 1 : 初始对齐5

Results data-1:Initial alignment5

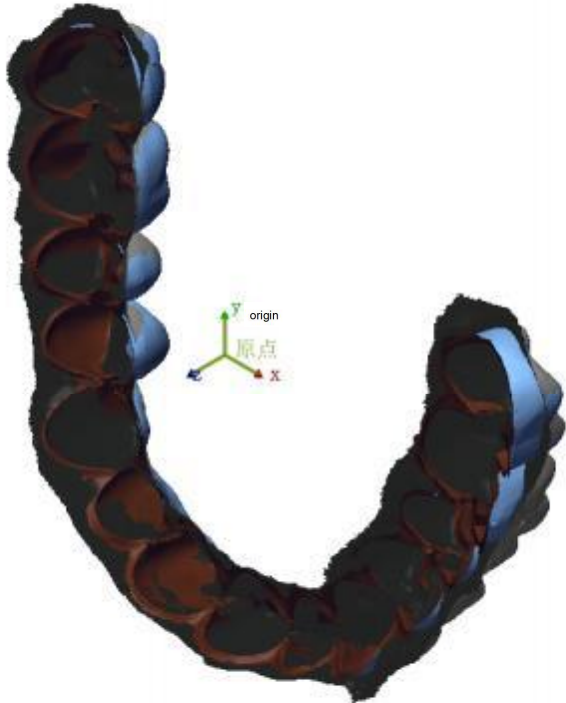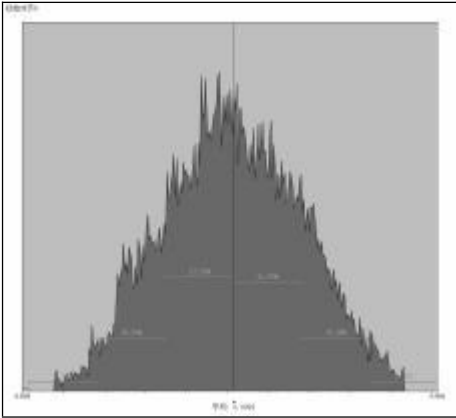

|                    |         |
|--------------------|---------|
| Minimum            | -0.4772 |
| Maximum            | 0.4774  |
| Average            | 0.0093  |
| RMS                | 0.1871  |
| Standard deviation | 0.1869  |
| Dispersion         | 0.0349  |
| +Average           | 0.1578  |
| -Average           | -0.1472 |

|              |                |
|--------------|----------------|
| Product Name | [Product Name] |
| Part Name    | [Part Name]    |

|            |              |
|------------|--------------|
| Department | [Department] |
| Inspector  | [Inspector]  |

|      |              |
|------|--------------|
| Date | Jul 18, 2023 |
| Unit | mm           |

# 结果数据 - 1 : 最佳拟合对齐5

Results data-1:Best-fit alignment5

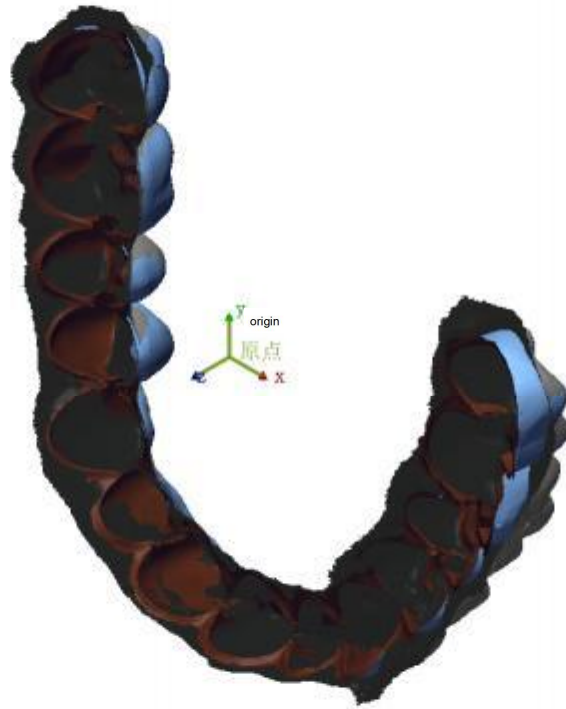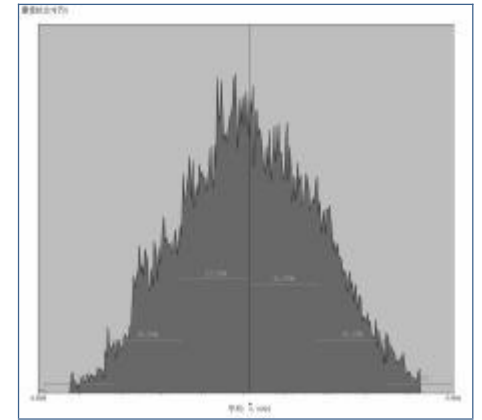

|                    |         |
|--------------------|---------|
| Minimum            | -0.4772 |
| Maximum            | 0.4774  |
| Average            | 0.0093  |
| RMS                | 0.1871  |
| Standard deviation | 0.1869  |
| Dispersion         | 0.0349  |
| +Average           | 0.1578  |
| -Average           | -0.1472 |

|              |                |
|--------------|----------------|
| Product Name | [Product Name] |
| Part Name    | [Part Name]    |

|            |              |
|------------|--------------|
| Department | [Department] |
| Inspector  | [Inspector]  |

|      |              |
|------|--------------|
| Date | Jul 18, 2023 |
| Unit | mm           |

# 结果数据 - 1 : 3D 比较绿1

Results data-1:3D compare Chlorogenic acid1

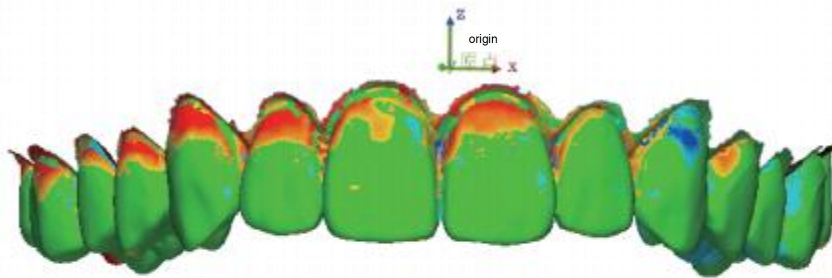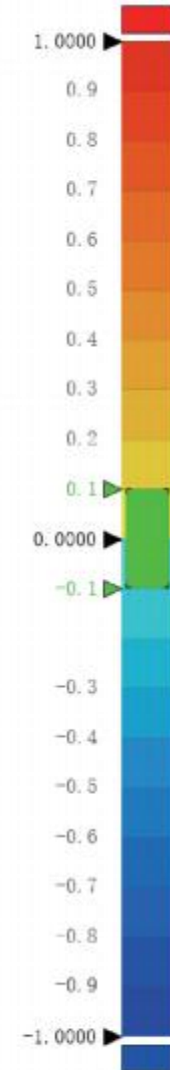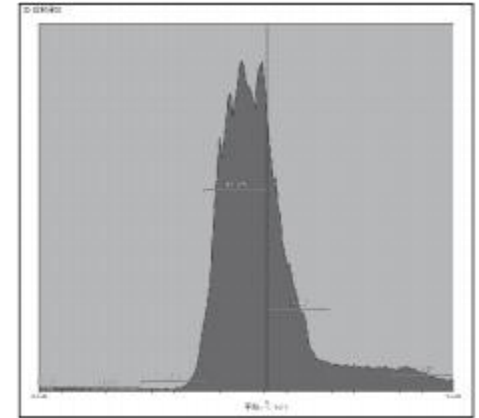

|                      |         |
|----------------------|---------|
| Minimum              | -2.2578 |
| Maximum              | 2.2581  |
| Average              | 0.1533  |
| RMS                  | 0.5169  |
| Standard deviation   | 0.4937  |
| Dispersion           | 0.2437  |
| +Average             | 0.4047  |
| -Average             | -0.1975 |
| Within Tolerance.(%) | 29.1408 |
| Out Of Tolerance(%)  | 70.8592 |
| Above Tolerance(%)   | 43.9511 |
| Below Tolerance(%)   | 26.9081 |

|              |                |
|--------------|----------------|
| Product Name | [Product Name] |
| Part Name    | [Part Name]    |

|            |              |
|------------|--------------|
| Department | [Department] |
| Inspector  | [Inspector]  |

|      |              |
|------|--------------|
| Date | Jul 18, 2023 |
| Unit | mm           |

| Name                            | Minimum | Maximum | Average | RMS    | Standard deviation | Dispersion | +Average | -Average |
|---------------------------------|---------|---------|---------|--------|--------------------|------------|----------|----------|
| 3D compare<br>Chlorogenic acid1 | -2.8686 | 2.8707  | 0.1282  | 0.5371 | 0.5216             | 0.2721     | 0.3108   | -0.1098  |

|              |                |
|--------------|----------------|
| Product Name | [Product Name] |
| Part Name    | [Part Name]    |

|            |              |
|------------|--------------|
| Department | [Department] |
| Inspector  | [Inspector]  |

|      |                     |
|------|---------------------|
| Date | <b>Jul 18, 2023</b> |
| Unit | mm                  |

# 结果数据 - 1 : 3D 比较-绿2

Results data-1:3D compare Chlorogenic acid2

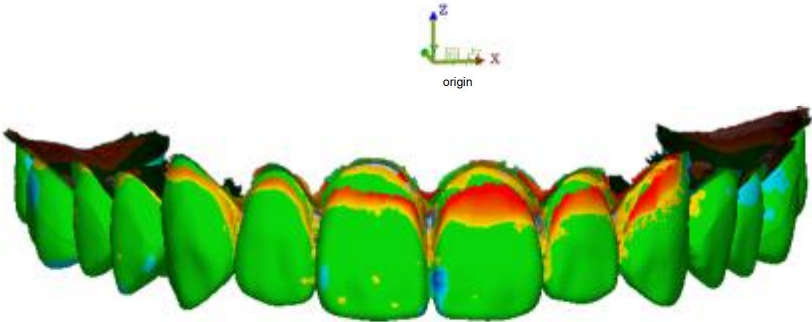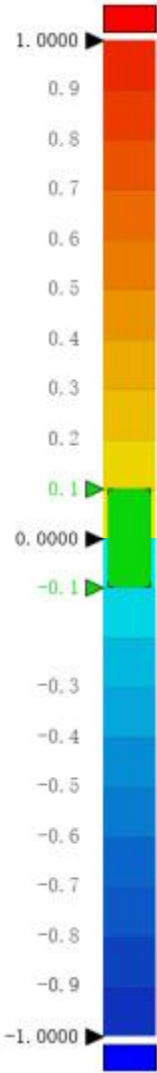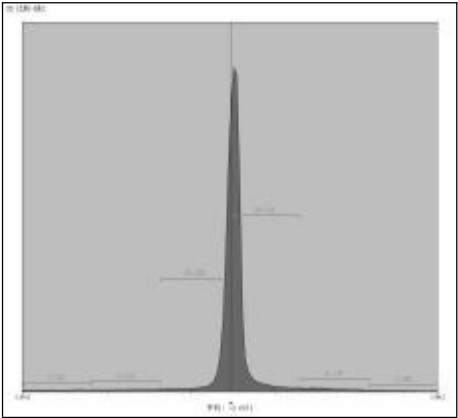

|                      |         |
|----------------------|---------|
| Minimum              | -2.7335 |
| Maximum              | 2.7335  |
| Average              | -0.0071 |
| RMS                  | 0.5248  |
| Standard deviation   | 0.5247  |
| Dispersion           | 0.2753  |
| +Average             | 0.1958  |
| -Average             | -0.2534 |
| Within Tolerance.(%) | 75.4062 |
| Out Of Tolerance(%)  | 24.5938 |
| Above Tolerance(%)   | 13.0101 |
| Below Tolerance(%)   | 11.5837 |

|              |                |
|--------------|----------------|
| Product Name | [Product Name] |
| Part Name    | [Part Name]    |

|            |              |
|------------|--------------|
| Department | [Department] |
| Inspector  | [Inspector]  |

|      |              |
|------|--------------|
| Date | Jul 18, 2023 |
| Unit | mm           |



| Name                            | Minimum | Maximum | Average | RMS    | Standard deviation | Dispersion | +Average | -Average |
|---------------------------------|---------|---------|---------|--------|--------------------|------------|----------|----------|
| 3D compare<br>Chlorogenic acid2 | -2.7335 | 2.7335  | -0.0071 | 0.5248 | 0.5247             | 0.2753     | 0.1958   | -0.2534  |

|              |                |
|--------------|----------------|
| Product Name | [Product Name] |
| Part Name    | [Part Name]    |

|            |              |
|------------|--------------|
| Department | [Department] |
| Inspector  | [Inspector]  |

|      |              |
|------|--------------|
| Date | Jul 18, 2023 |
| Unit | mm           |

# 结果数据 - 1 : 3D 比较-绿3

Results data-1:3D compare Chlorogenic acid3

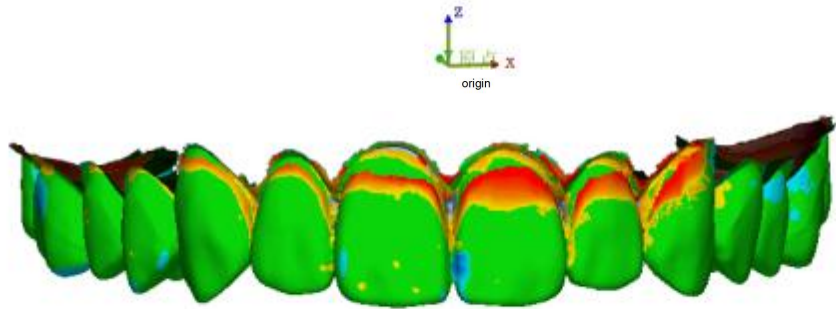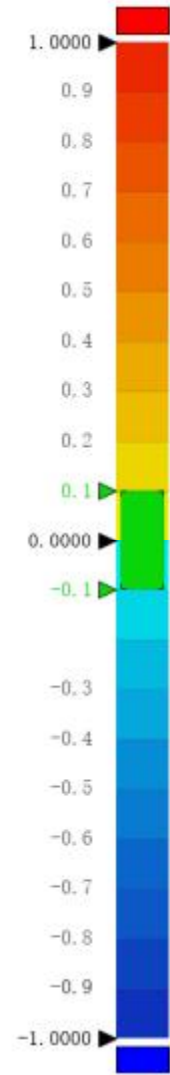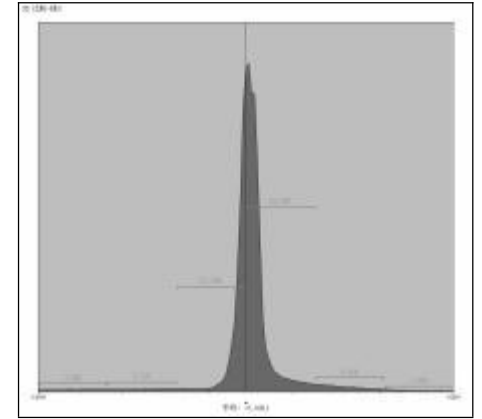

|                     |         |
|---------------------|---------|
| Minimum             | -1.8951 |
| Maximum             | 1.895   |
| Average             | -0.0061 |
| RMS                 | 0.3624  |
| Standard deviation  | 0.3623  |
| Dispersion          | 0.1313  |
| +Average            | 0.1346  |
| -Average            | -0.1961 |
| Within Tolerance(%) | 76.3744 |
| Out Of Tolerance(%) | 23.6256 |
| Above Tolerance(%)  | 13.7362 |
| Below Tolerance(%)  | 9.8893  |

|              |                |
|--------------|----------------|
| Product Name | [Product Name] |
| Part Name    | [Part Name]    |

|            |              |
|------------|--------------|
| Department | [Department] |
| Inspector  | [Inspector]  |

|      |              |
|------|--------------|
| Date | Jul 18, 2023 |
| Unit | mm           |

| Name                            | Minimum | Maximum | Average | RMS    | Standard deviation | Dispersion | +Average | -Average |
|---------------------------------|---------|---------|---------|--------|--------------------|------------|----------|----------|
| 3D compare<br>Chlorogenic acid3 | -1.8951 | 1.895   | -0.0061 | 0.3624 | 0.3623             | 0.1313     | 0.1346   | -0.1961  |

|              |                |
|--------------|----------------|
| Product Name | [Product Name] |
| Part Name    | [Part Name]    |

|            |              |
|------------|--------------|
| Department | [Department] |
| Inspector  | [Inspector]  |

|      |              |
|------|--------------|
| Date | Jul 18, 2023 |
| Unit | mm           |

# 结果数据 - 1 : 3D 比较-绿4

Results data-1:3D compare Chlorogenic acid4

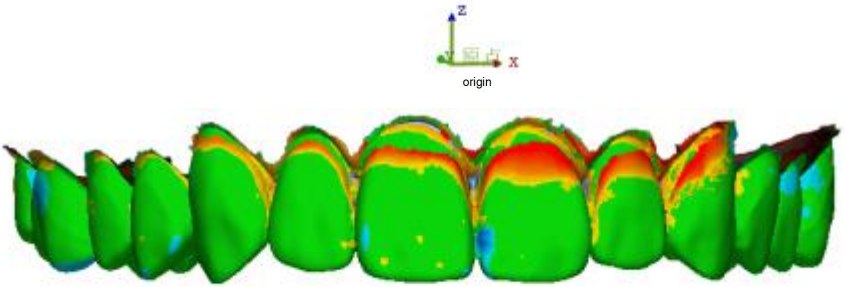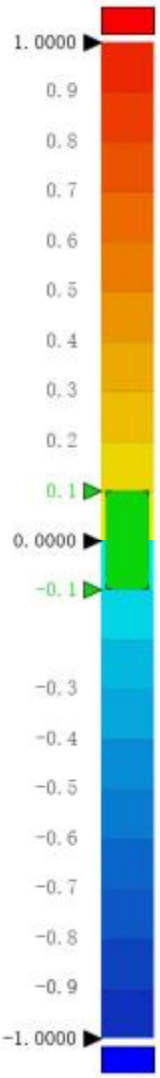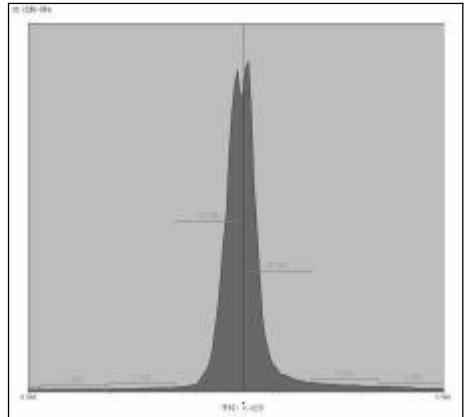

|                     |         |
|---------------------|---------|
| Minimum             | -1.3413 |
| Maximum             | 1.3412  |
| Average             | 0.0225  |
| RMS                 | 0.2556  |
| Standard deviation  | 0.2546  |
| Dispersion          | 0.0648  |
| +Average            | 0.1291  |
| -Average            | -0.1161 |
| Within Tolerance(%) | 78.1616 |
| Out Of Tolerance(%) | 21.8384 |
| Above Tolerance(%)  | 13.765  |
| Below Tolerance(%)  | 8.0734  |

|              |                |
|--------------|----------------|
| Product Name | [Product Name] |
| Part Name    | [Part Name]    |

|            |              |
|------------|--------------|
| Department | [Department] |
| Inspector  | [Inspector]  |

|      |              |
|------|--------------|
| Date | Jul 18, 2023 |
| Unit | mm           |

| Name                            | Minimum | Maximum | Average | RMS    | Standard deviation | Dispersion | +Average | -Average |
|---------------------------------|---------|---------|---------|--------|--------------------|------------|----------|----------|
| 3D compare<br>Chlorogenic acid4 | -1.3413 | 1.3412  | 0.0225  | 0.2556 | 0.2546             | 0.0648     | 0.1291   | -0.1161  |

|              |                |
|--------------|----------------|
| Product Name | [Product Name] |
|--------------|----------------|

|            |              |
|------------|--------------|
| Department | [Department] |
| Inspector  | [Inspector]  |

|      |              |
|------|--------------|
| Date | Jul 18, 2023 |
| Unit | mm           |

|           |             |
|-----------|-------------|
| Part Name | [Part Name] |
|-----------|-------------|

# 结果数据 - 1 : 3D 比较-绿5

Results data-1:3D compare Chlorogenic acid5

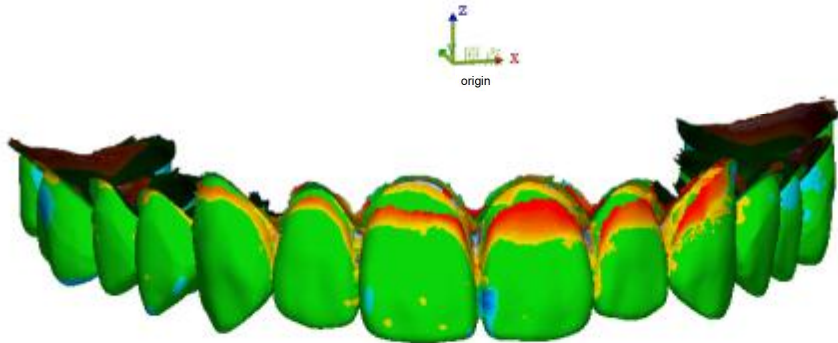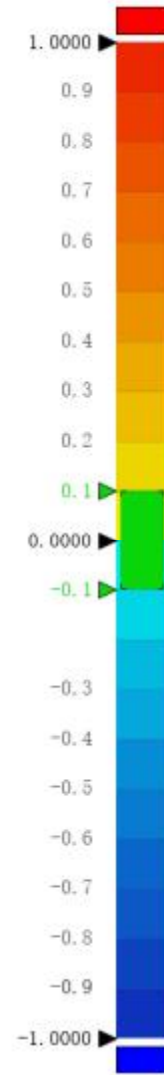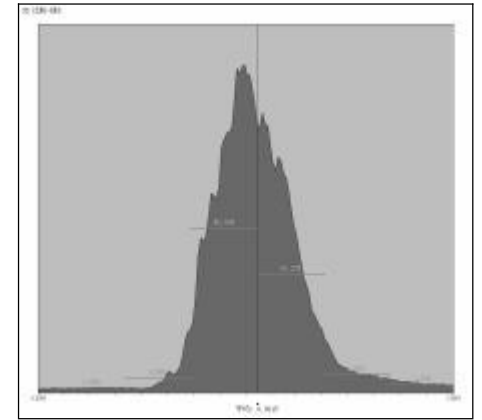

|                      |         |
|----------------------|---------|
| Minimum              | -1.9511 |
| Maximum              | 1.9506  |
| Average              | 0.0615  |
| RMS                  | 0.396   |
| Standard deviation   | 0.3912  |
| Dispersion           | 0.153   |
| +Average             | 0.2906  |
| -Average             | -0.2085 |
| Within Tolerance.(%) | 31.9315 |
| Out Of Tolerance(%)  | 68.0685 |
| Above Tolerance(%)   | 38.9087 |
| Below Tolerance(%)   | 29.1598 |

|              |                |
|--------------|----------------|
| Product Name | [Product Name] |
| Part Name    | [Part Name]    |

|            |              |
|------------|--------------|
| Department | [Department] |
| Inspector  | [Inspector]  |

|      |              |
|------|--------------|
| Date | Jul 18, 2023 |
|------|--------------|

|      |    |
|------|----|
| Unit | mm |
|------|----|



| Name                            | Minimum | Maximum | Average | RMS   | Standard deviation | Dispersion | +Average | -Average |
|---------------------------------|---------|---------|---------|-------|--------------------|------------|----------|----------|
| 3D compare<br>Chlorogenic acid5 | -1.9511 | 1.9506  | 0.0615  | 0.396 | 0.3912             | 0.153      | 0.2906   | -0.2085  |

|              |                |
|--------------|----------------|
| Product Name | [Product Name] |
| Part Name    | [Part Name]    |

|            |              |
|------------|--------------|
| Department | [Department] |
| Inspector  | [Inspector]  |

|      |              |
|------|--------------|
| Date | Jul 18, 2023 |
| Unit | mm           |

# 结果数据 - 1 : 参考数据 - 初始

Results data-1:Reference data-Initial

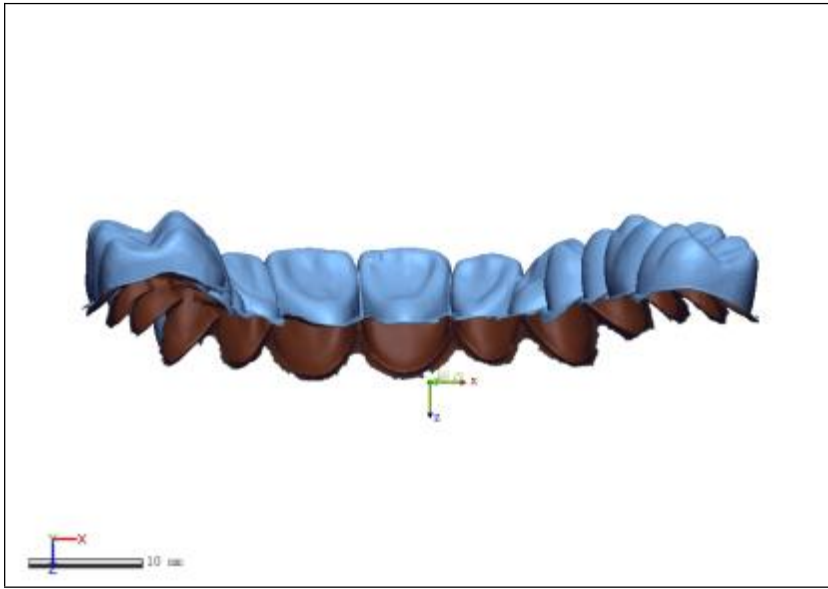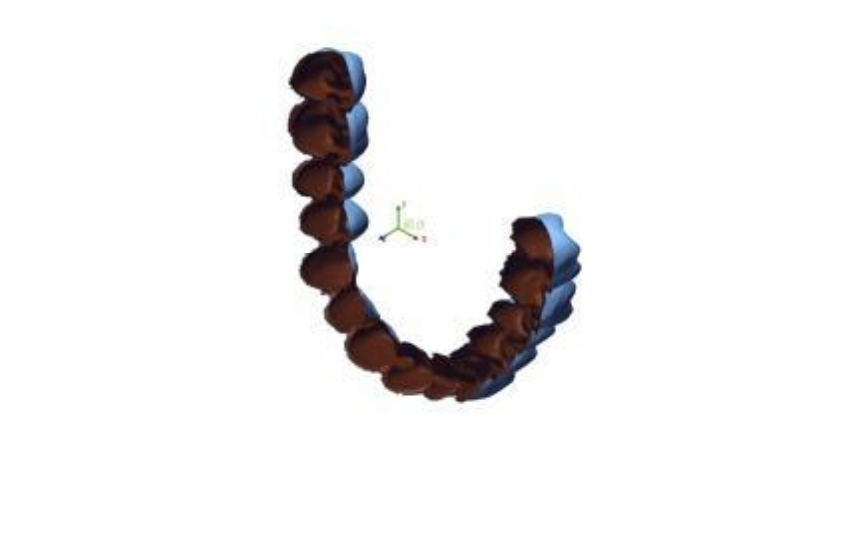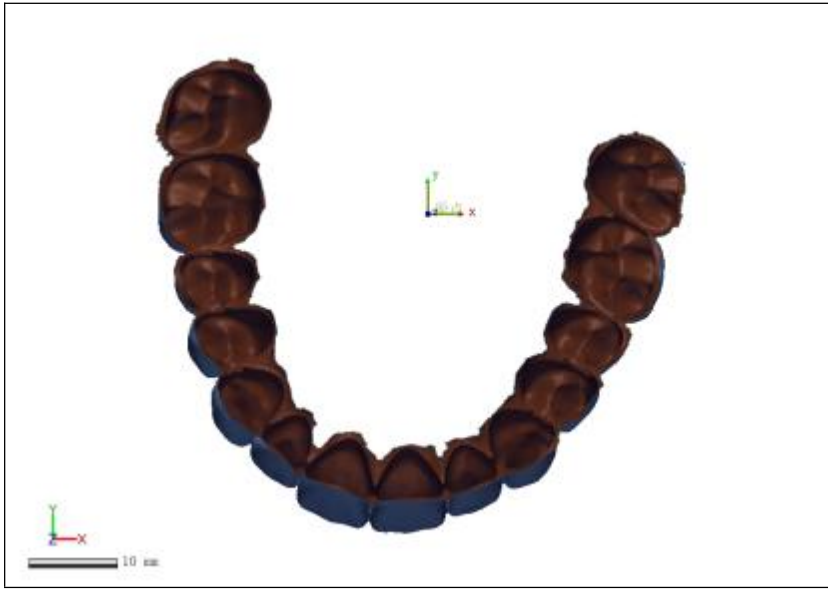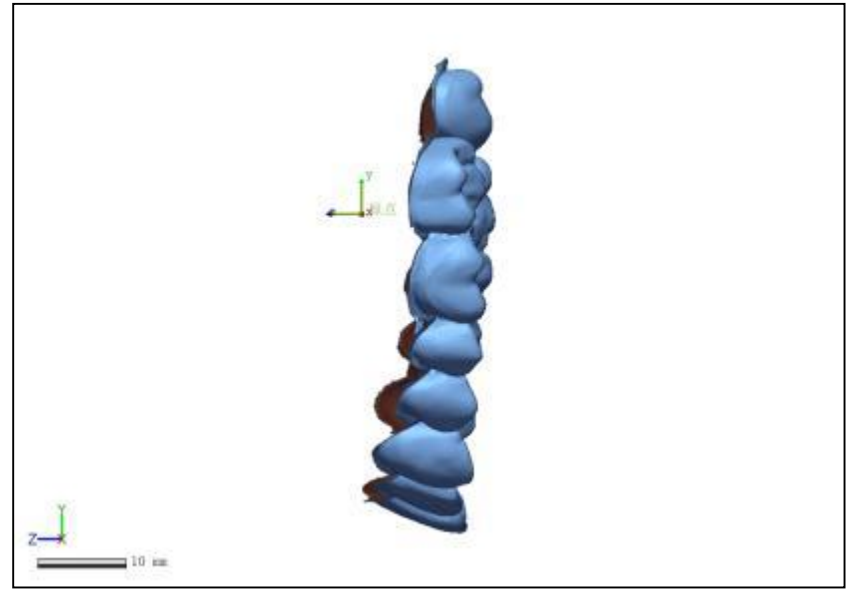

|              |                |
|--------------|----------------|
| Product Name | [Product Name] |
|--------------|----------------|

|            |              |
|------------|--------------|
| Department | [Department] |
| Inspector  | [Inspector]  |

|      |              |
|------|--------------|
| Date | Jul 24, 2023 |
| Unit | mm           |

|           |             |
|-----------|-------------|
| Part Name | [Part Name] |
|-----------|-------------|

# 结果数据 - 1 : 测试数据 - 绿10

Results data-1: Test Data-Chlorogenic acid10

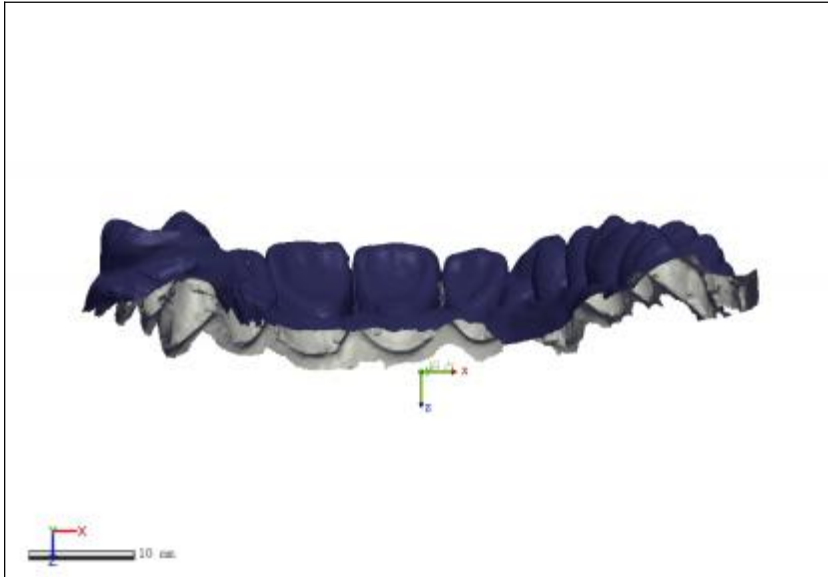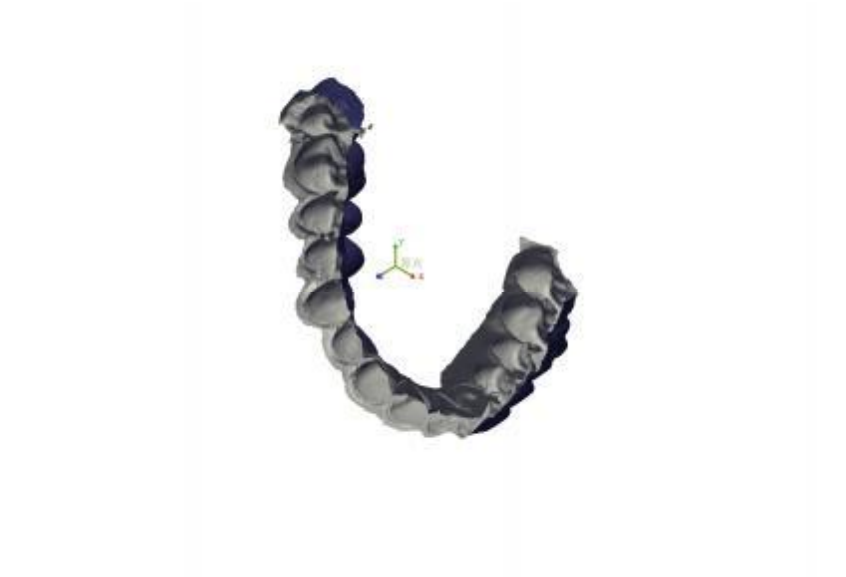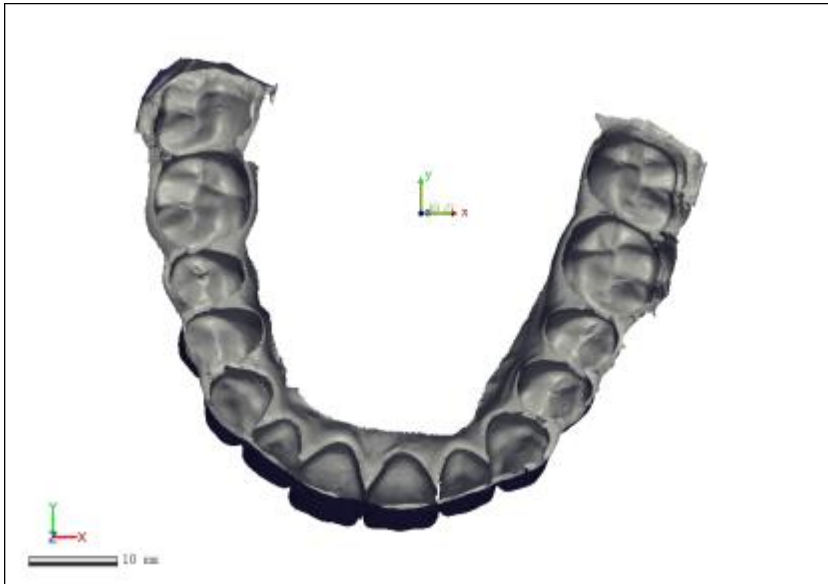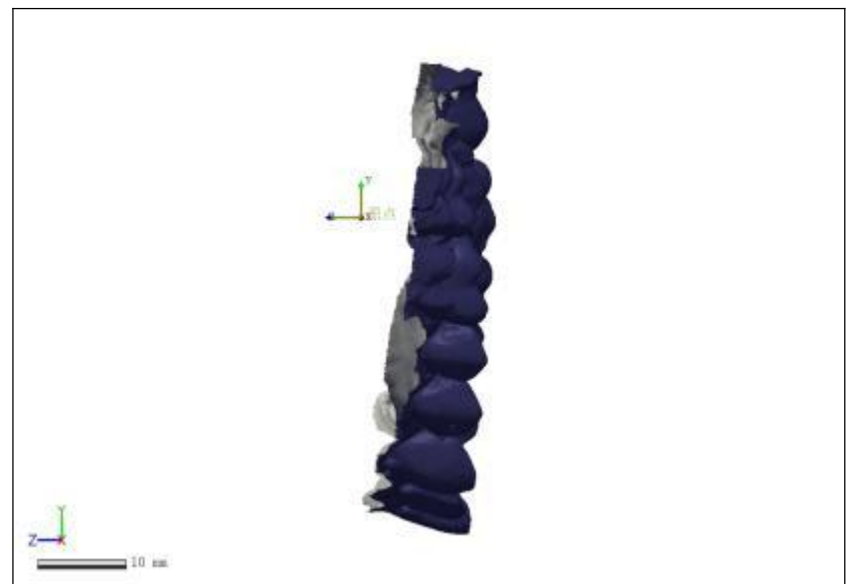

|              |                |            |              |      |              |
|--------------|----------------|------------|--------------|------|--------------|
| Product Name | [Product Name] | Department | [Department] | Date | Jul 24, 2023 |
| Part Name    | [Part Name]    | Inspector  | [Inspector]  | Unit | mm           |

# 结果数据 - 1 : 初始对齐1

Results data-1:Initial alignment1

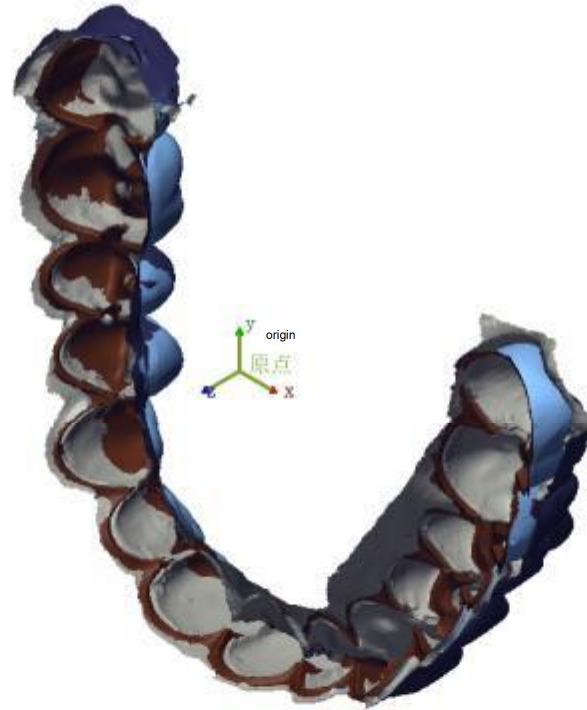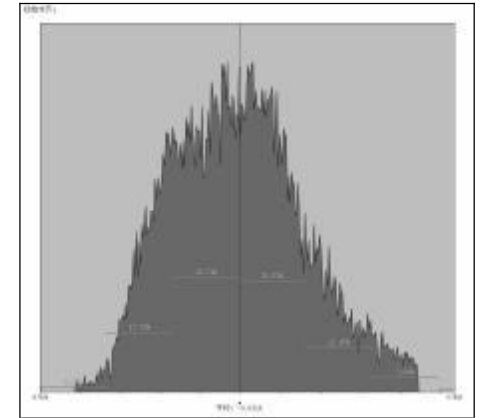

|                    |         |
|--------------------|---------|
| Minimum            | -0.6264 |
| Maximum            | 0.6271  |
| Average            | -0.0316 |
| RMS                | 0.2458  |
| Standard deviation | 0.2438  |
| Dispersion         | 0.0594  |
| +Average           | 0.192   |
| -Average           | -0.2071 |

|              |                |
|--------------|----------------|
| Product Name | [Product Name] |
| Part Name    | [Part Name]    |

|            |              |
|------------|--------------|
| Department | [Department] |
| Inspector  | [Inspector]  |

|      |              |
|------|--------------|
| Date | Jul 24, 2023 |
| Unit | mm           |

# 结果数据 - 1 : 最佳拟合对齐1

Results data-1:Best-fit alignment1

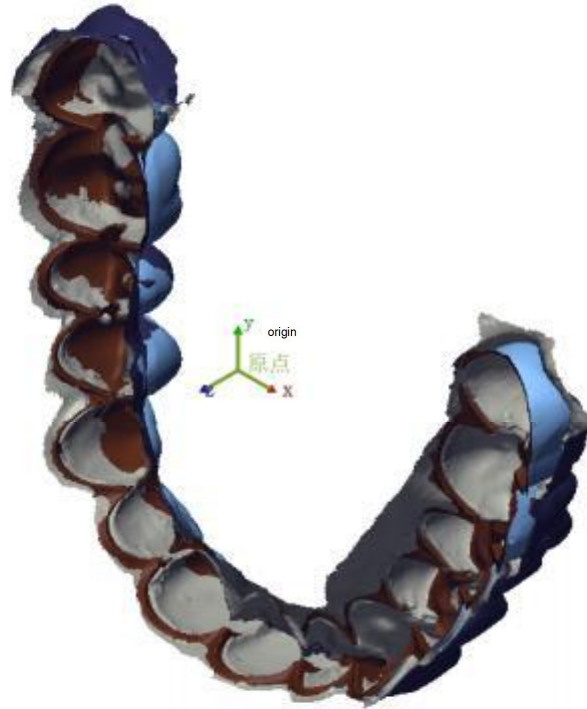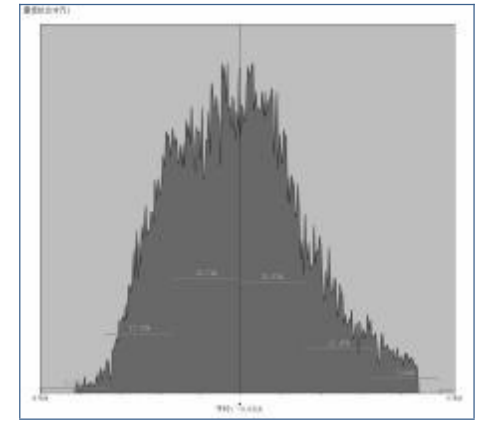

|                    |         |
|--------------------|---------|
| Minimum            | -0.6264 |
| Maximum            | 0.6271  |
| Average            | -0.0316 |
| RMS                | 0.2458  |
| Standard deviation | 0.2438  |
| Dispersion         | 0.0594  |
| +Average           | 0.192   |
| -Average           | -0.2071 |

|              |                |
|--------------|----------------|
| Product Name | [Product Name] |
| Part Name    | [Part Name]    |

|            |              |
|------------|--------------|
| Department | [Department] |
| Inspector  | [Inspector]  |

|      |              |
|------|--------------|
| Date | Jul 24, 2023 |
| Unit | mm           |

# 结果数据 - 1 : 初始对齐2

Results data-1:Initial alignment2

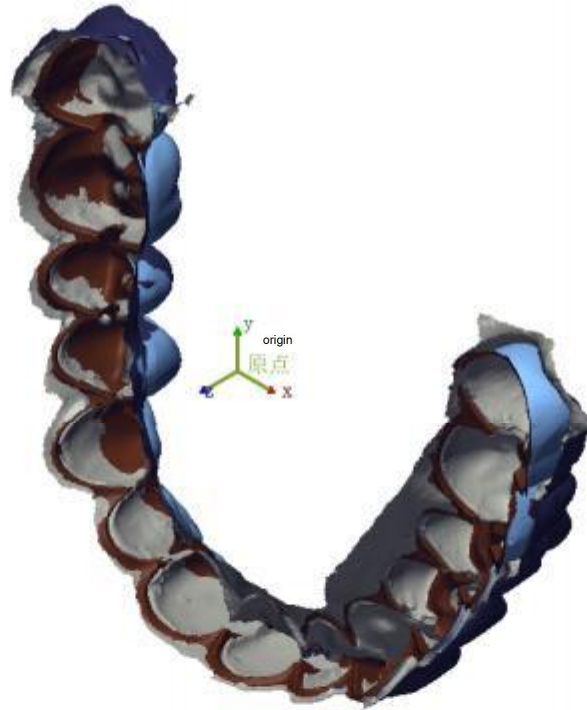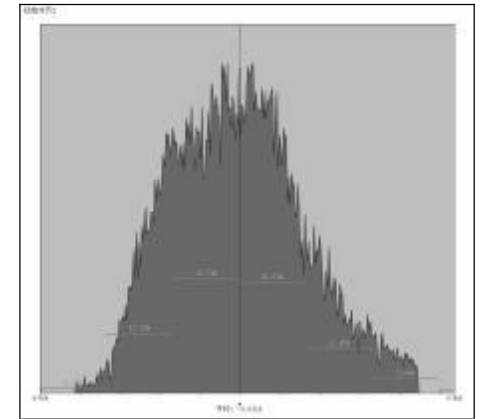

|                    |         |
|--------------------|---------|
| Minimum            | -0.6264 |
| Maximum            | 0.6271  |
| Average            | -0.0316 |
| RMS                | 0.2458  |
| Standard deviation | 0.2438  |
| Dispersion         | 0.0594  |
| +Average           | 0.192   |
| -Average           | -0.2071 |

|              |                |
|--------------|----------------|
| Product Name | [Product Name] |
| Part Name    | [Part Name]    |

|            |              |
|------------|--------------|
| Department | [Department] |
| Inspector  | [Inspector]  |

|      |              |
|------|--------------|
| Date | Jul 24, 2023 |
| Unit | mm           |

# 结果数据 - 1 : 最佳拟合对齐2

Results data-1:Best-fit alignment2

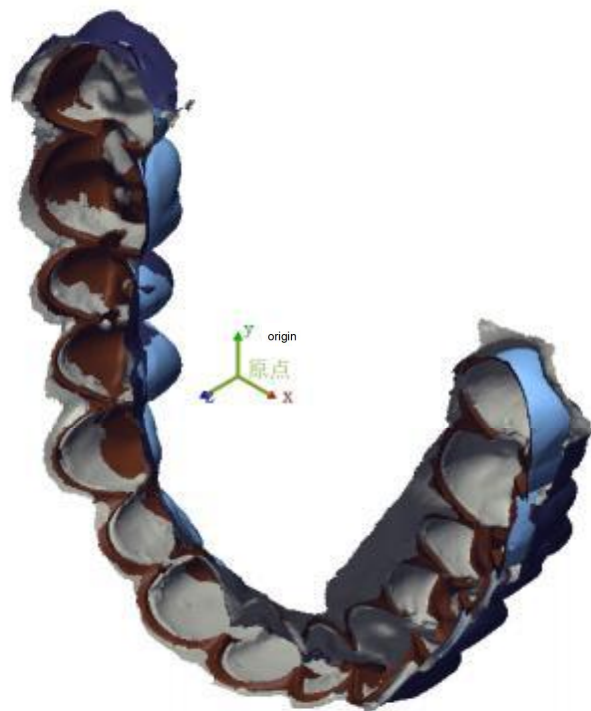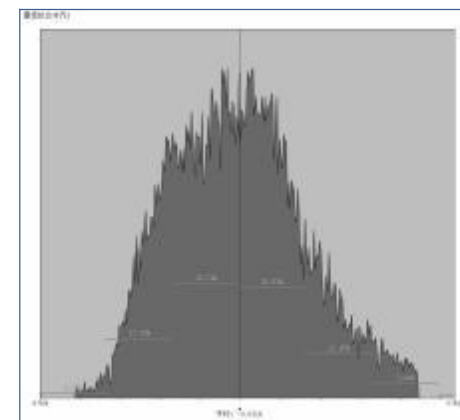

|                    |         |
|--------------------|---------|
| Minimum            | -0.6264 |
| Maximum            | 0.6271  |
| Average            | -0.0316 |
| RMS                | 0.2458  |
| Standard deviation | 0.2438  |
| Dispersion         | 0.0594  |
| +Average           | 0.192   |
| -Average           | -0.2071 |

|              |                |
|--------------|----------------|
| Product Name | [Product Name] |
| Part Name    | [Part Name]    |

|            |              |
|------------|--------------|
| Department | [Department] |
| Inspector  | [Inspector]  |

|      |              |
|------|--------------|
| Date | Jul 24, 2023 |
| Unit | mm           |



# 结果数据 - 1 : 初始对齐3

Results data-1:Initial alignment3

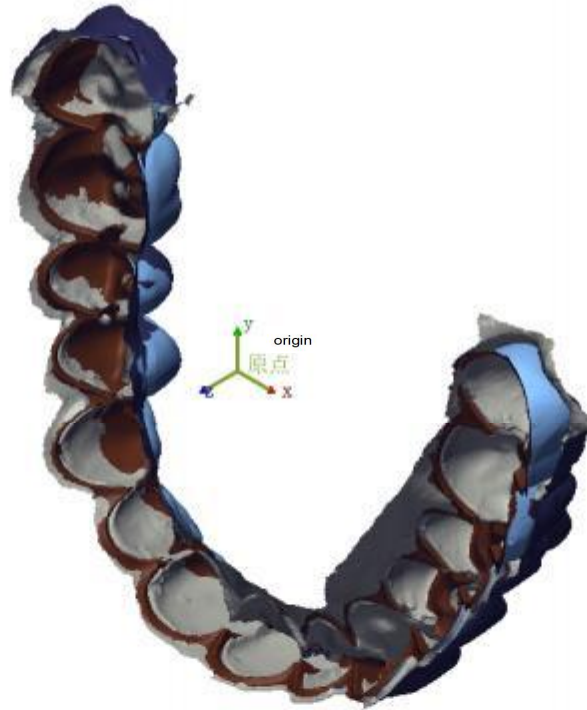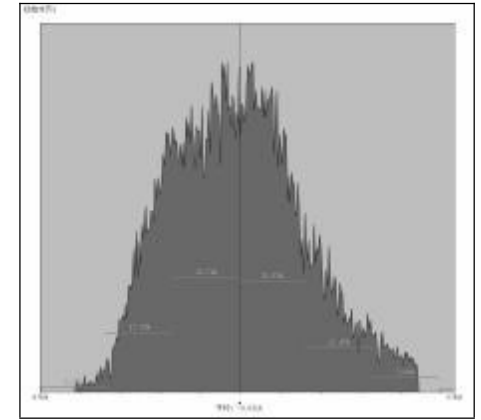

|                    |         |
|--------------------|---------|
| Minimum            | -0.6264 |
| Maximum            | 0.6271  |
| Average            | -0.0316 |
| RMS                | 0.2458  |
| Standard deviation | 0.2438  |
| Dispersion         | 0.0594  |
| +Average           | 0.192   |
| -Average           | -0.2071 |

|              |                |
|--------------|----------------|
| Product Name | [Product Name] |
| Part Name    | [Part Name]    |

|            |              |
|------------|--------------|
| Department | [Department] |
| Inspector  | [Inspector]  |

|      |              |
|------|--------------|
| Date | Jul 24, 2023 |
| Unit | mm           |

# 结果数据 - 1 : 最佳拟合对齐3

Results data-1:Best-fit alignment3

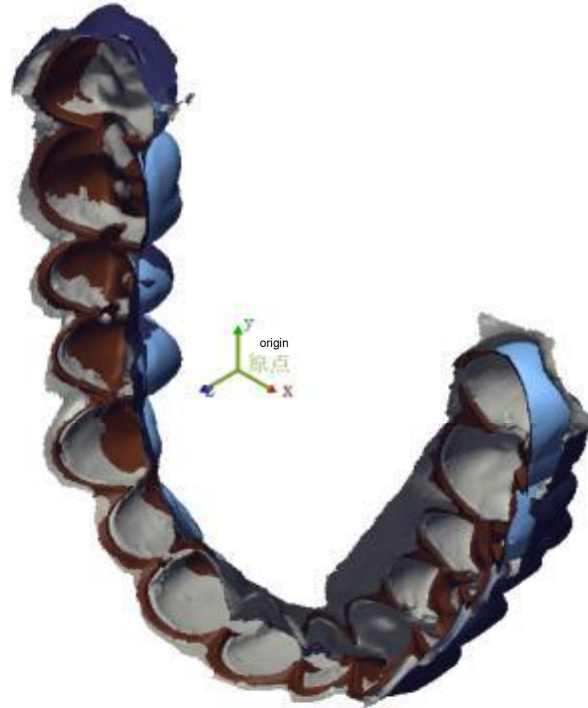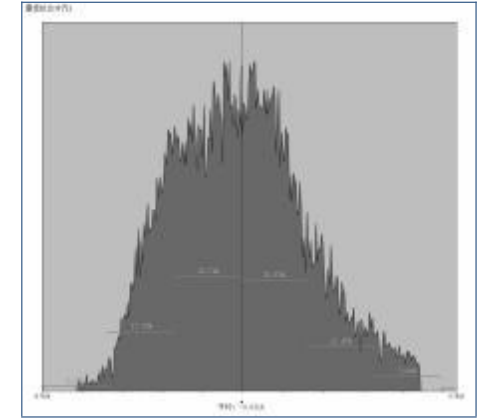

|                    |         |
|--------------------|---------|
| Minimum            | -0.6264 |
| Maximum            | 0.6271  |
| Average            | -0.0316 |
| RMS                | 0.2458  |
| Standard deviation | 0.2438  |
| Dispersion         | 0.0594  |
| +Average           | 0.192   |
| -Average           | -0.2071 |

|              |                |
|--------------|----------------|
| Product Name | [Product Name] |
| Part Name    | [Part Name]    |

|            |              |
|------------|--------------|
| Department | [Department] |
| Inspector  | [Inspector]  |

|      |              |
|------|--------------|
| Date | Jul 24, 2023 |
| Unit | mm           |

# 结果数据 - 1 : 初始对齐4

Results data-1:Initial alignment4

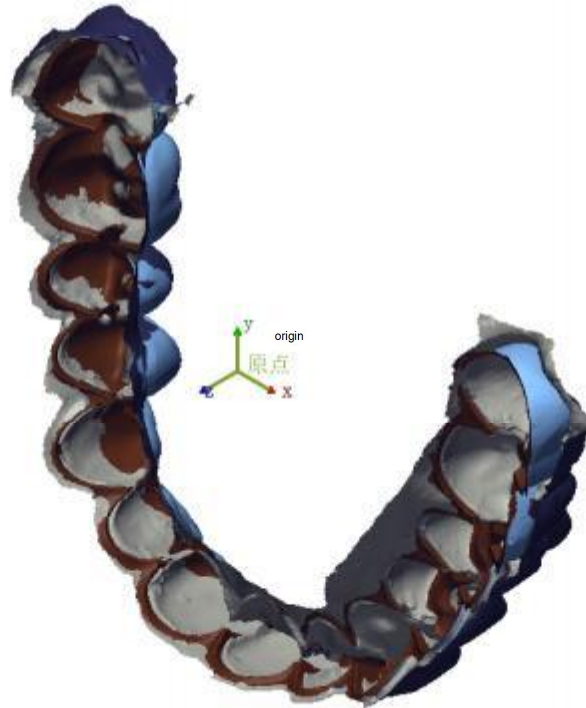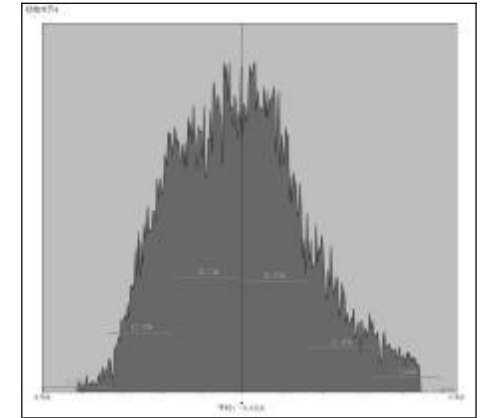

|                    |         |
|--------------------|---------|
| Minimum            | -0.6264 |
| Maximum            | 0.6271  |
| Average            | -0.0316 |
| RMS                | 0.2458  |
| Standard deviation | 0.2438  |
| Dispersion         | 0.0594  |
| +Average           | 0.192   |
| -Average           | -0.2071 |

|              |                |
|--------------|----------------|
| Product Name | [Product Name] |
| Part Name    | [Part Name]    |

|            |              |
|------------|--------------|
| Department | [Department] |
| Inspector  | [Inspector]  |

|      |              |
|------|--------------|
| Date | Jul 24, 2023 |
| Unit | mm           |

# 结果数据 - 1 : 最佳拟合对齐4

Results data-1:Best-fit alignment4

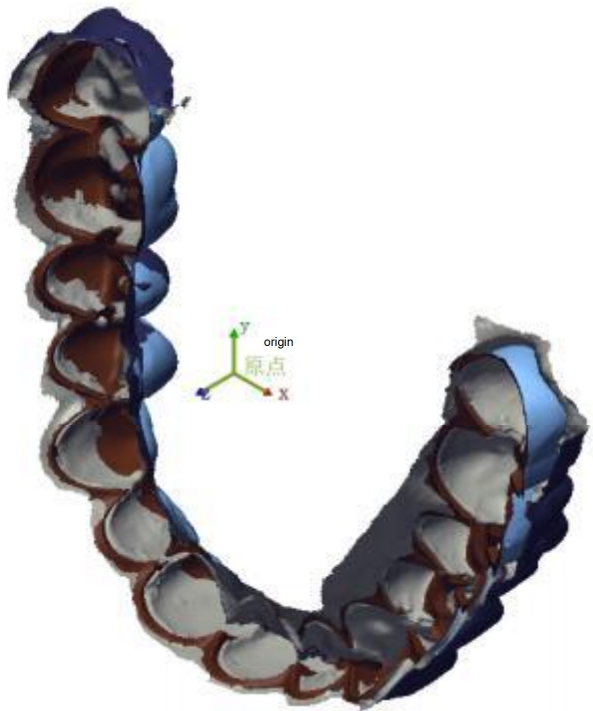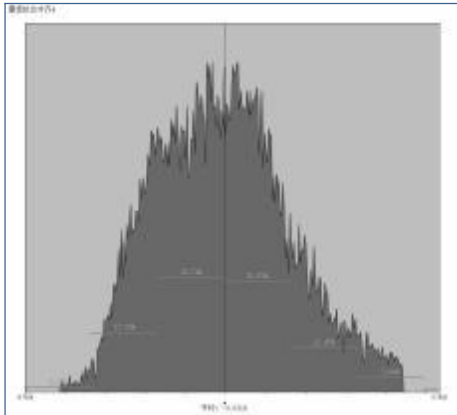

|                    |         |
|--------------------|---------|
| Minimum            | -0.6264 |
| Maximum            | 0.6271  |
| Average            | -0.0316 |
| RMS                | 0.2458  |
| Standard deviation | 0.2438  |
| Dispersion         | 0.0594  |
| +Average           | 0.192   |
| -Average           | -0.2071 |

|              |                |
|--------------|----------------|
| Product Name | [Product Name] |
| Part Name    | [Part Name]    |

|            |              |
|------------|--------------|
| Department | [Department] |
| Inspector  | [Inspector]  |

|      |              |
|------|--------------|
| Date | Jul 24, 2023 |
| Unit | mm           |

# 结果数据 - 1 : 初始对齐5

Results data-1:Initial alignment5

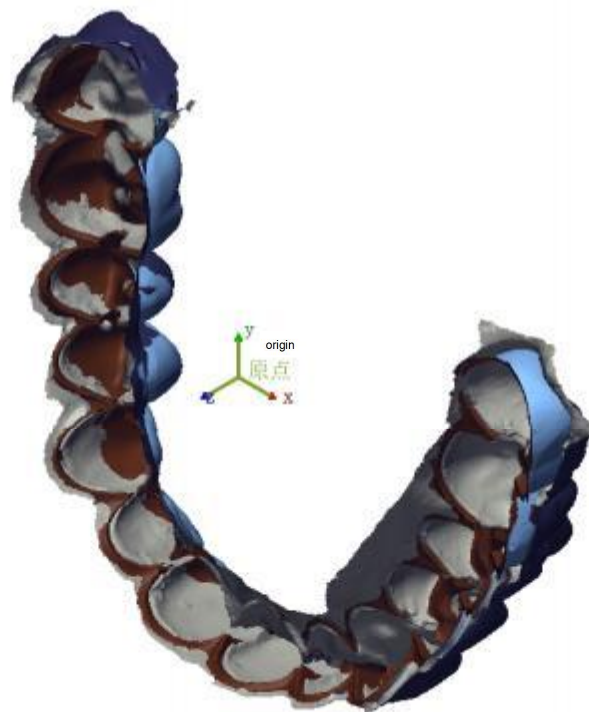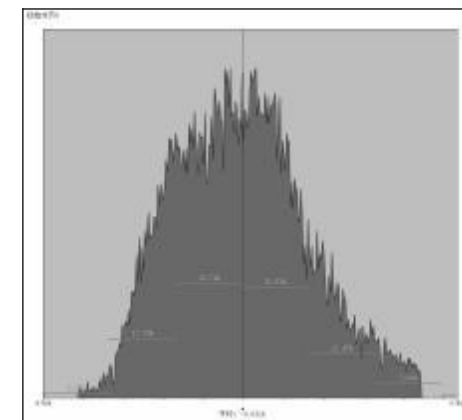

|                    |         |
|--------------------|---------|
| Minimum            | -0.6264 |
| Maximum            | 0.6271  |
| Average            | -0.0316 |
| RMS                | 0.2458  |
| Standard deviation | 0.2438  |
| Dispersion         | 0.0594  |
| +Average           | 0.192   |
| -Average           | -0.2071 |

|              |                |
|--------------|----------------|
| Product Name | [Product Name] |
| Part Name    | [Part Name]    |

|            |              |
|------------|--------------|
| Department | [Department] |
| Inspector  | [Inspector]  |

|      |              |
|------|--------------|
| Date | Jul 24, 2023 |
| Unit | mm           |

# 结果数据 - 1 : 最佳拟合对齐5

Results data-1:Best-fit alignment5

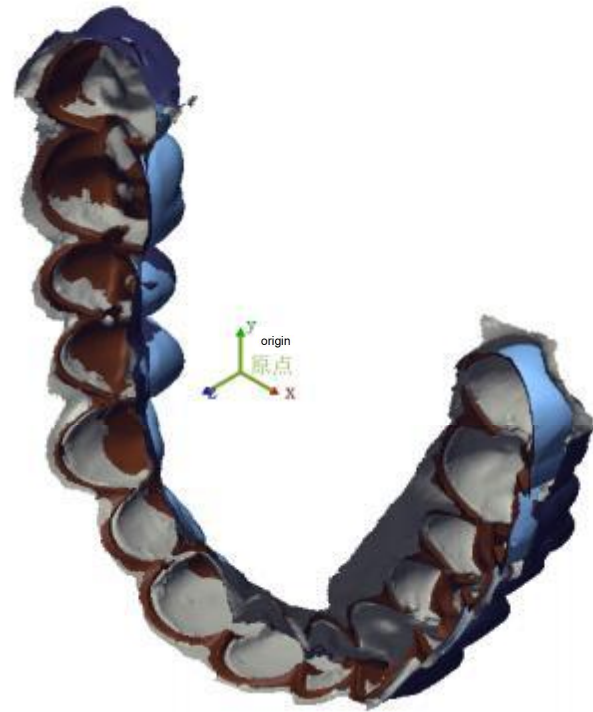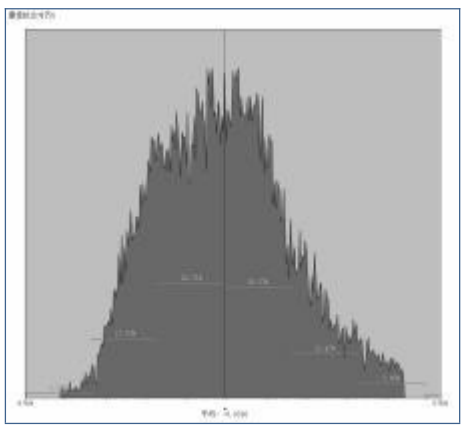

|                    |         |
|--------------------|---------|
| Minimum            | -0.6264 |
| Maximum            | 0.6271  |
| Average            | -0.0316 |
| RMS                | 0.2458  |
| Standard deviation | 0.2438  |
| Dispersion         | 0.0594  |
| +Average           | 0.192   |
| -Average           | -0.2071 |

|              |                |            |              |      |              |
|--------------|----------------|------------|--------------|------|--------------|
| Product Name | [Product Name] | Department | [Department] | Date | Jul 24, 2023 |
| Part Name    | [Part Name]    | Inspector  | [Inspector]  | Unit | mm           |

# 结果数据 - 1 : 3D 比较绿6

Results data-1:3D compare Chlorogenic acid6

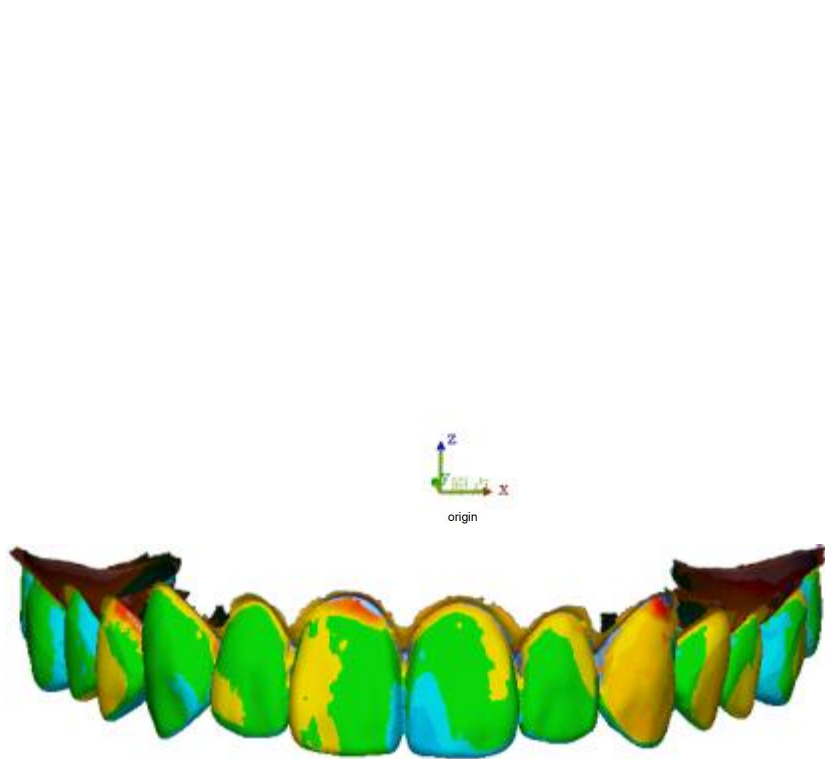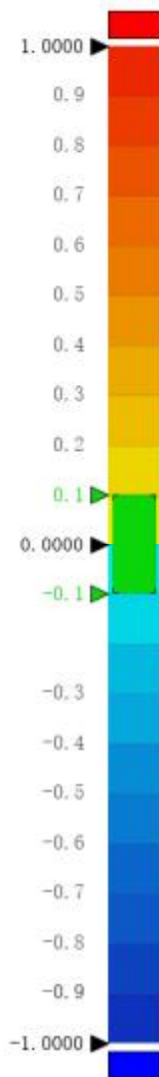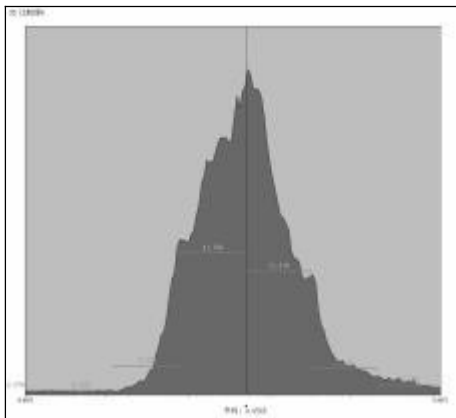

|                     |         |
|---------------------|---------|
| Minimum             | -1.6488 |
| Maximum             | 1.6485  |
| Average             | 0.0565  |
| RMS                 | 0.3187  |
| Standard deviation  | 0.3136  |
| Dispersion          | 0.0983  |
| +Average            | 0.2402  |
| -Average            | -0.1923 |
| Within Tolerance(%) | 32.9189 |
| Out Of Tolerance(%) | 67.0811 |
| Above Tolerance(%)  | 39.6071 |
| Below Tolerance(%)  | 27.474  |

|              |                |
|--------------|----------------|
| Product Name | [Product Name] |
| Part Name    | [Part Name]    |

|            |              |
|------------|--------------|
| Department | [Department] |
| Inspector  | [Inspector]  |

|      |              |
|------|--------------|
| Date | Jul 24, 2023 |
| Unit | mm           |



| Name                            | Minimum | Maximum | Average | RMS    | Standard deviation | Dispersion | +Average | -Average |
|---------------------------------|---------|---------|---------|--------|--------------------|------------|----------|----------|
| 3D compare<br>Chlorogenic acid6 | -1.6488 | 1.6485  | 0.0565  | 0.3187 | 0.3136             | 0.0983     | 0.2402   | -0.1923  |

|              |                |
|--------------|----------------|
| Product Name | [Product Name] |
| Part Name    | [Part Name]    |

|            |              |
|------------|--------------|
| Department | [Department] |
| Inspector  | [Inspector]  |

|      |                     |
|------|---------------------|
| Date | <b>Jul 18, 2023</b> |
| Unit | mm                  |

# 结果数据 - 1 : 3D 比较绿7

Results data-1:3D compare Chlorogenic acid7

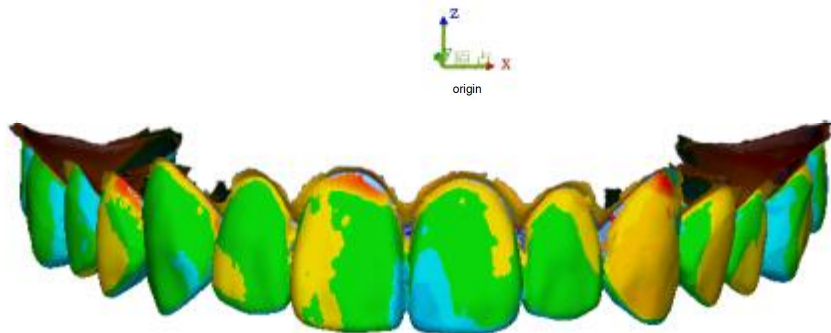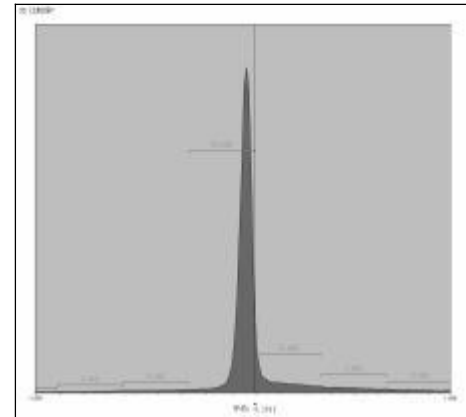

|                      |         |
|----------------------|---------|
| Minimum              | -2.9078 |
| Maximum              | 2.9078  |
| Average              | 0.1011  |
| RMS                  | 0.6206  |
| Standard deviation   | 0.6123  |
| Dispersion           | 0.3749  |
| +Average             | 0.3419  |
| -Average             | -0.2299 |
| Within Tolerance.(%) | 67.2227 |
| Out Of Tolerance(%)  | 32.7773 |
| Above Tolerance(%)   | 21.2387 |
| Below Tolerance(%)   | 11.5386 |

|              |                |
|--------------|----------------|
| Product Name | [Product Name] |
| Part Name    | [Part Name]    |

|            |              |
|------------|--------------|
| Department | [Department] |
| Inspector  | [Inspector]  |

|      |              |
|------|--------------|
| Date | Jul 24, 2023 |
| Unit | mm           |

| Name                            | Minimum | Maximum | Average | RMS    | Standard deviation | Dispersion | +Average | -Average |
|---------------------------------|---------|---------|---------|--------|--------------------|------------|----------|----------|
| 3D compare<br>Chlorogenic acid7 | -2.9078 | 2.9078  | 0.1011  | 0.6206 | 0.6123             | 0.3749     | 0.3419   | -0.2299  |

|              |                |
|--------------|----------------|
| Product Name | [Product Name] |
| Part Name    | [Part Name]    |

|            |              |
|------------|--------------|
| Department | [Department] |
| Inspector  | [Inspector]  |

|      |              |
|------|--------------|
| Date | Jul 18, 2023 |
| Unit | mm           |

# 结果数据 - 1 : 3D 比较绿8

Results data-1:3D compare Chlorogenic acid8

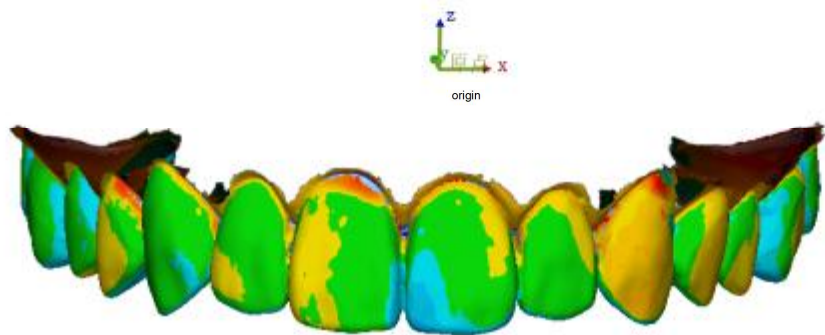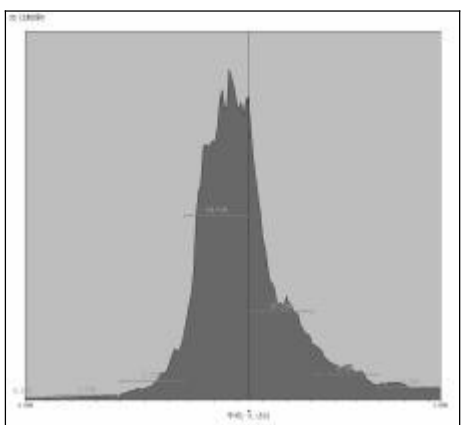

|                      |         |
|----------------------|---------|
| Minimum              | -3.1249 |
| Maximum              | 3.1248  |
| Average              | 0.1533  |
| RMS                  | 0.6858  |
| Standard deviation   | 0.6684  |
| Dispersion           | 0.4468  |
| +Average             | 0.5645  |
| -Average             | -0.3127 |
| Within Tolerance.(%) | 20.0767 |
| Out Of Tolerance(%)  | 79.9233 |
| Above Tolerance(%)   | 43.4231 |
| Below Tolerance(%)   | 36.5002 |

|              |                |
|--------------|----------------|
| Product Name | [Product Name] |
| Part Name    | [Part Name]    |

|            |              |
|------------|--------------|
| Department | [Department] |
| Inspector  | [Inspector]  |

|      |              |
|------|--------------|
| Date | Jul 24, 2023 |
| Unit | mm           |

| Name                            | Minimum | Maximum | Average | RMS    | Standard deviation | Dispersion | +Average | -Average |
|---------------------------------|---------|---------|---------|--------|--------------------|------------|----------|----------|
| 3D compare<br>Chlorogenic acid8 | -3.1249 | 3.1248  | 0.1533  | 0.6858 | 0.6684             | 0.4468     | 0.5645   | -0.3127  |

|              |                |
|--------------|----------------|
| Product Name | [Product Name] |
| Part Name    | [Part Name]    |

|            |              |
|------------|--------------|
| Department | [Department] |
| Inspector  | [Inspector]  |

|      |              |
|------|--------------|
| Date | Jul 18, 2023 |
| Unit | mm           |

# 结果数据 - 1 : 3D 比较绿9

Results data-1:3D compare Chlorogenic acid9

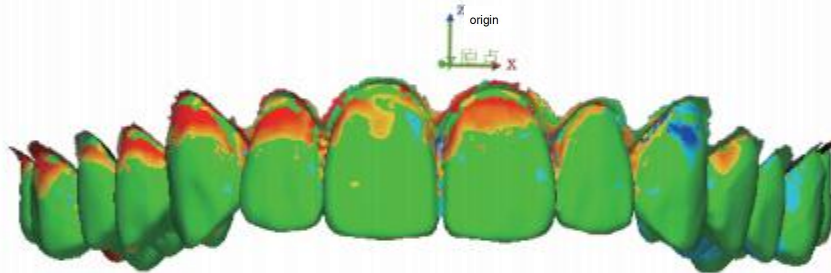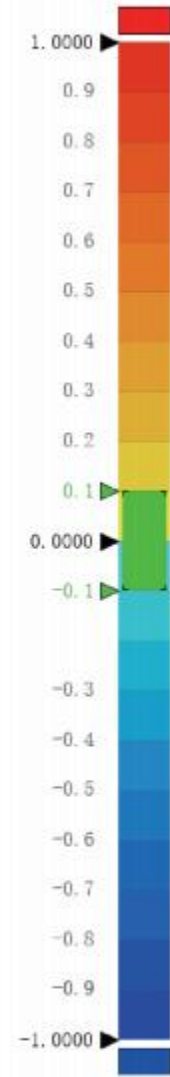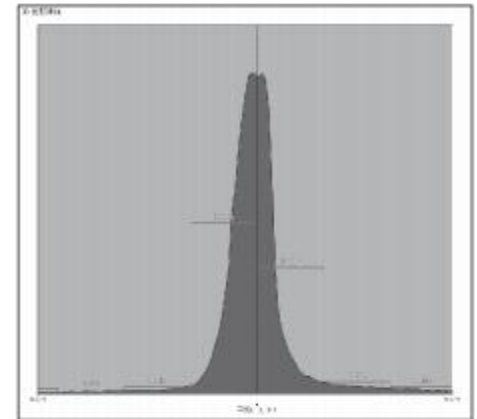

|                      |         |
|----------------------|---------|
| Minimum              | -1.3039 |
| Maximum              | 1.304   |
| Average              | 0.031   |
| RMS                  | 0.2045  |
| Standard deviation   | 0.2021  |
| Dispersion           | 0.0408  |
| +Average             | 0.1059  |
| -Average             | -0.0959 |
| Within Tolerance.(%) | 79.7058 |
| Out Of Tolerance(%)  | 20.2942 |
| Above Tolerance(%)   | 13.5846 |
| Below Tolerance(%)   | 6.7096  |

|              |                |            |              |      |              |
|--------------|----------------|------------|--------------|------|--------------|
| Product Name | [Product Name] | Department | [Department] | Date | Jul 24, 2023 |
| Part Name    | [Part Name]    | Inspector  | [Inspector]  | Unit | mm           |

| Name                          | Minimum | Maximum | Average | RMS    | Standard deviation | Dispersion | +Average | -Average |
|-------------------------------|---------|---------|---------|--------|--------------------|------------|----------|----------|
| 3D compare Chlorogenic acid14 | -1.3039 | 1.304   | 0.031   | 0.2045 | 0.2021             | 0.0408     | 0.1059   | -0.0959  |

|              |                |
|--------------|----------------|
| Product Name | [Product Name] |
| Part Name    | [Part Name]    |

|            |              |
|------------|--------------|
| Department | [Department] |
| Inspector  | [Inspector]  |

|      |                     |
|------|---------------------|
| Date | <b>Jul 18, 2023</b> |
| Unit | mm                  |

# 结果数据 - 1 : 3D 比较绿10

Results data-1:3D compare Chlorogenic acid10

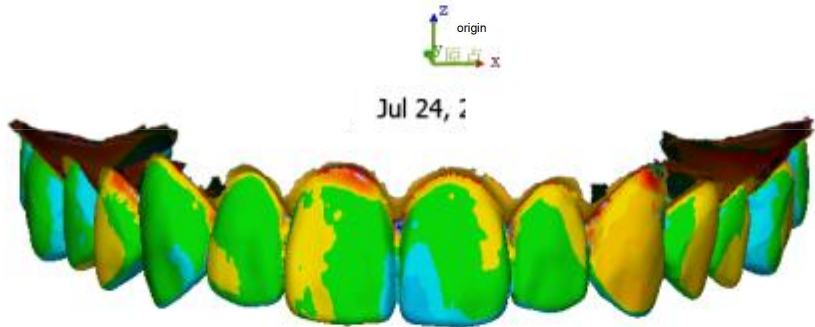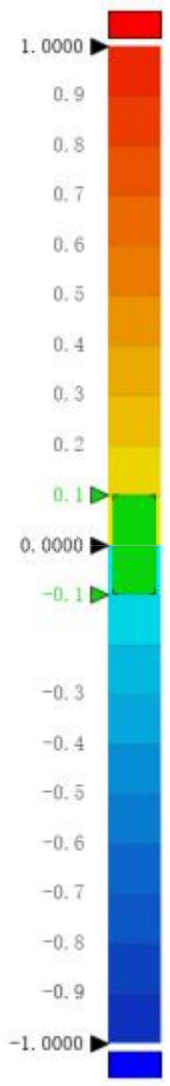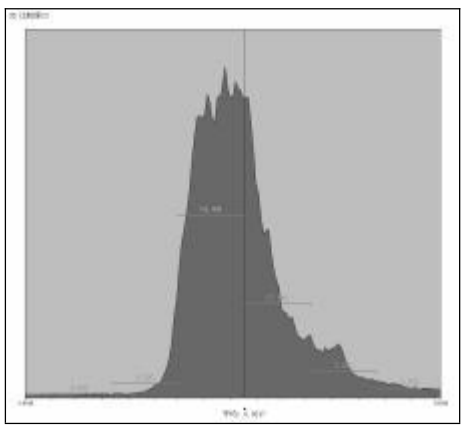

|                      |         |
|----------------------|---------|
| Minimum              | -2.527  |
| Maximum              | 2.5286  |
| Average              | 0.0817  |
| RMS                  | 0.5182  |
| Standard deviation   | 0.5117  |
| Dispersion           | 0.2619  |
| +Average             | 0.4204  |
| -Average             | -0.2537 |
| Within Tolerance.(%) | 24.5692 |
| Out Of Tolerance(%)  | 75.4308 |
| Above Tolerance(%)   | 37.5549 |
| Below Tolerance(%)   | 37.876  |

|              |                |
|--------------|----------------|
| Product Name | [Product Name] |
| Part Name    | [Part Name]    |

|            |              |
|------------|--------------|
| Department | [Department] |
| Inspector  | [Inspector]  |

|      |              |
|------|--------------|
| Date | Jul 24, 2023 |
| Unit | mm           |



| Name                          | Minimum | Maximum | Average | RMS    | Standard deviation | Dispersion | +Average | -Average |
|-------------------------------|---------|---------|---------|--------|--------------------|------------|----------|----------|
| 3D compare Chlorogenic acid10 | -2.527  | 2.5286  | 0.0817  | 0.5182 | 0.5117             | 0.2619     | 0.4204   | -0.2537  |

|              |                |
|--------------|----------------|
| Product Name | [Product Name] |
| Part Name    | [Part Name]    |

|            |              |
|------------|--------------|
| Department | [Department] |
| Inspector  | [Inspector]  |

|      |              |
|------|--------------|
| Date | Jul 18, 2023 |
| Unit | mm           |

# 结果数据 - 1 : 参考数据 - 初始

Results data-1:Reference data-Initial

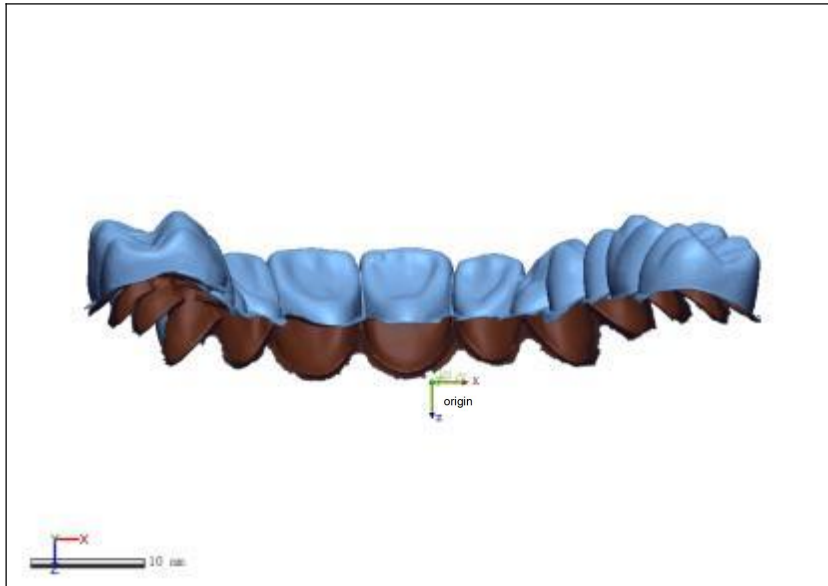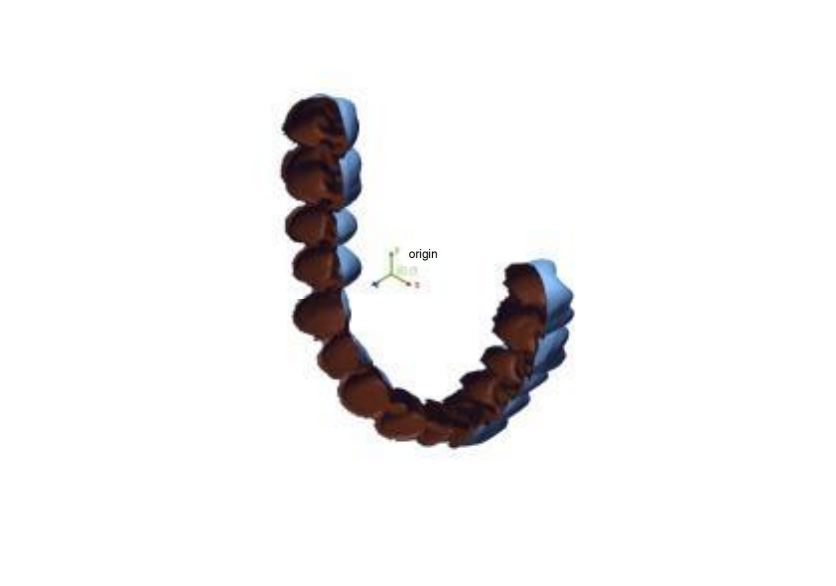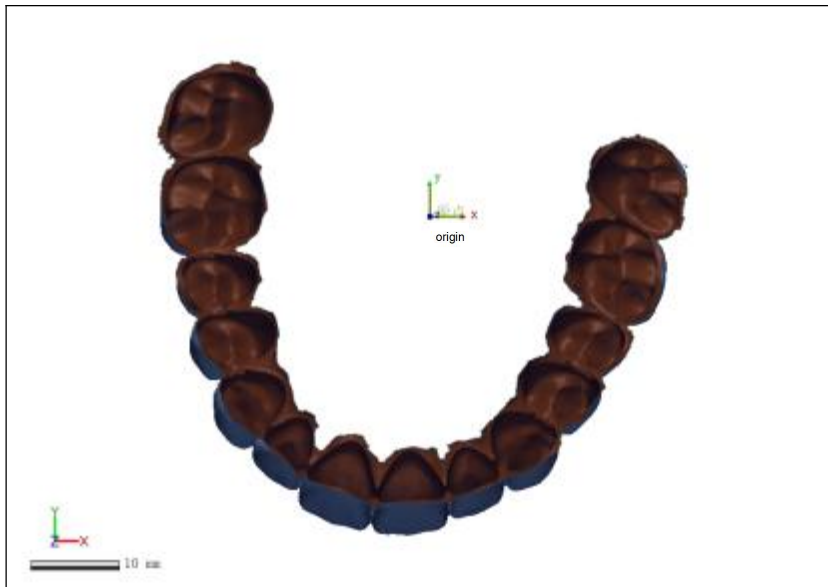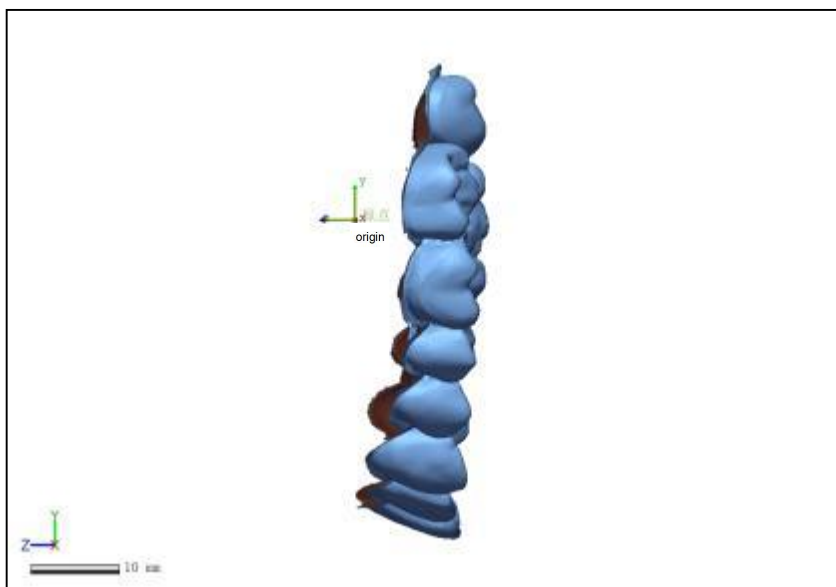

|              |                |
|--------------|----------------|
| Product Name | [Product Name] |
| Part Name    | [Part Name]    |

|            |              |
|------------|--------------|
| Department | [Department] |
| Inspector  | [Inspector]  |

|      |              |
|------|--------------|
| Date | Jul 26, 2023 |
| Unit | mm           |

# 结果数据 - 1 : 测试数据 - 绿12

Results data-1:Test data- Chlorogenic acid12

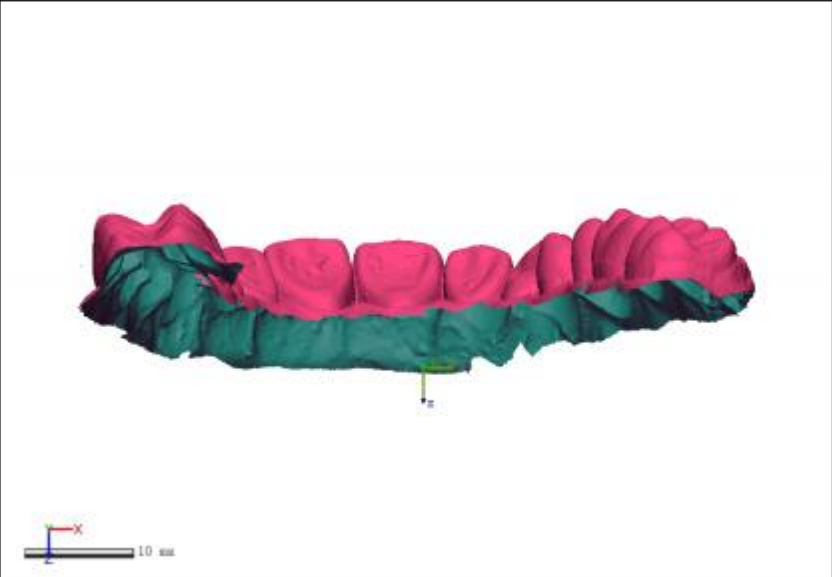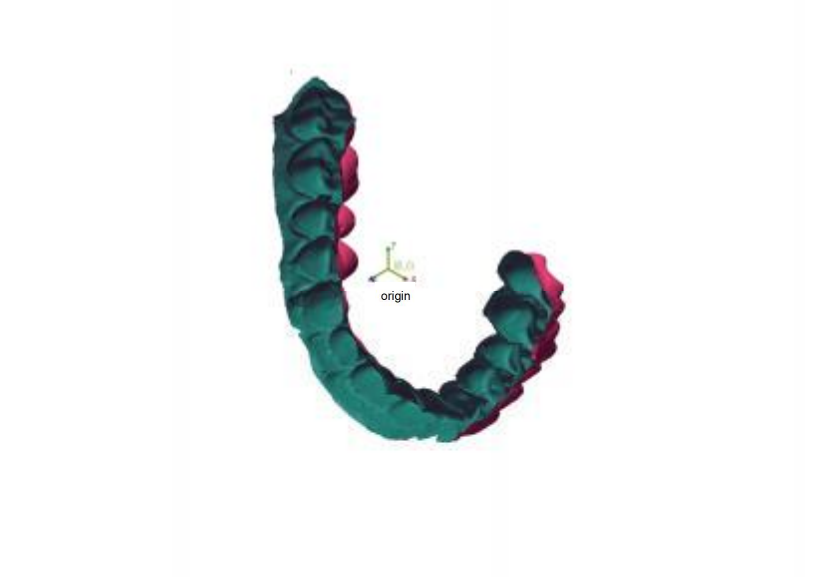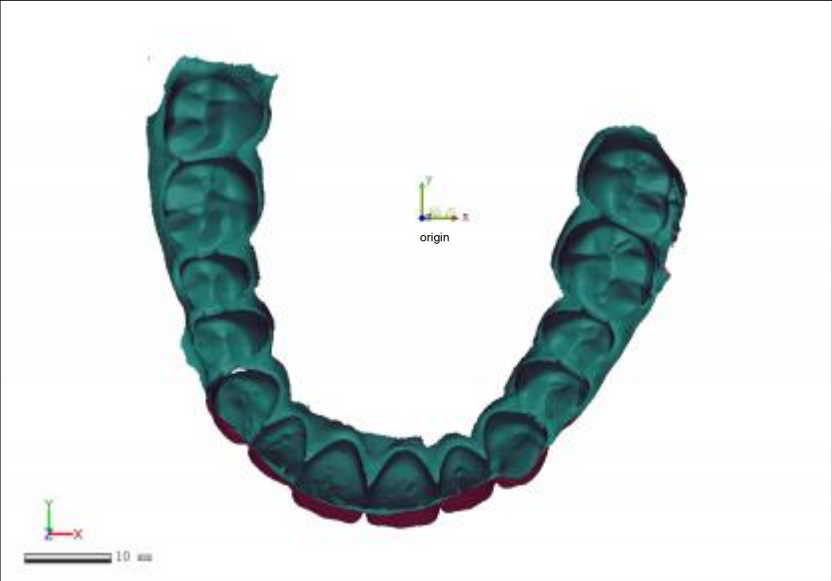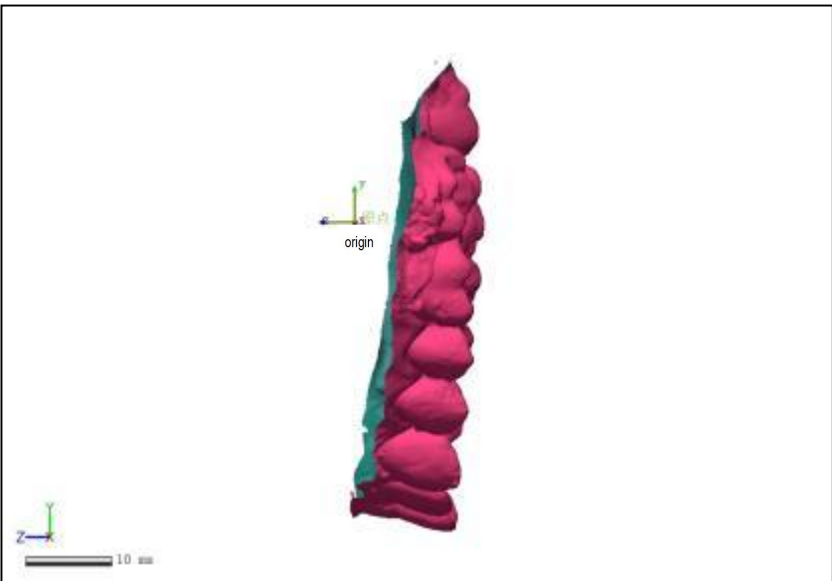

|              |                |            |              |      |              |
|--------------|----------------|------------|--------------|------|--------------|
| Product Name | [Product Name] | Department | [Department] | Date | Jul 26, 2023 |
| Part Name    | [Part Name]    | Inspector  | [Inspector]  | Unit | mm           |

# 结果数据 - 1 : 初始对齐1

Results data-1:Initial alignment1

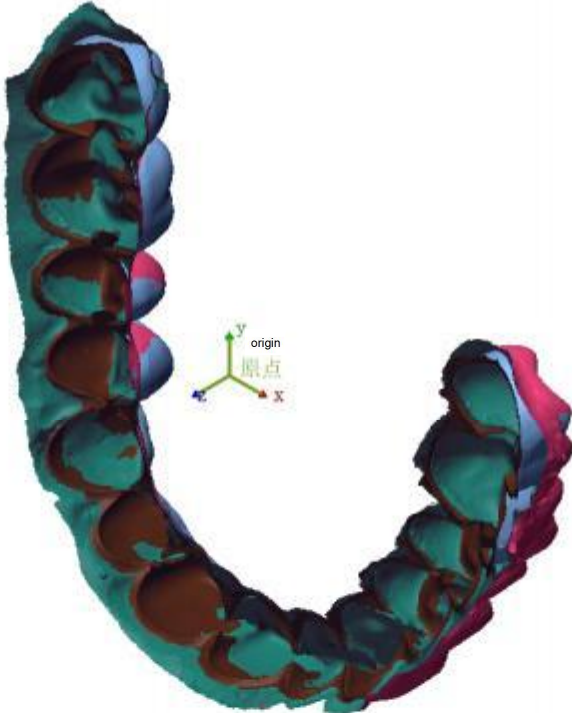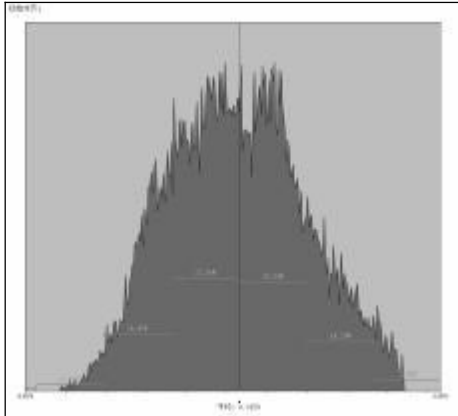

|                    |         |
|--------------------|---------|
| Minimum            | -0.4827 |
| Maximum            | 0.4847  |
| Average            | 0.0159  |
| RMS                | 0.1913  |
| Standard deviation | 0.1906  |
| Dispersion         | 0.0363  |
| +Average           | 0.1669  |
| -Average           | -0.1466 |

|              |                |
|--------------|----------------|
| Product Name | [Product Name] |
| Part Name    | [Part Name]    |

|            |              |
|------------|--------------|
| Department | [Department] |
| Inspector  | [Inspector]  |

|      |              |
|------|--------------|
| Date | Jul 26, 2023 |
| Unit | mm           |

# 结果数据 - 1 : 最佳拟合对齐1

Results data-1:Best-fit alignment1

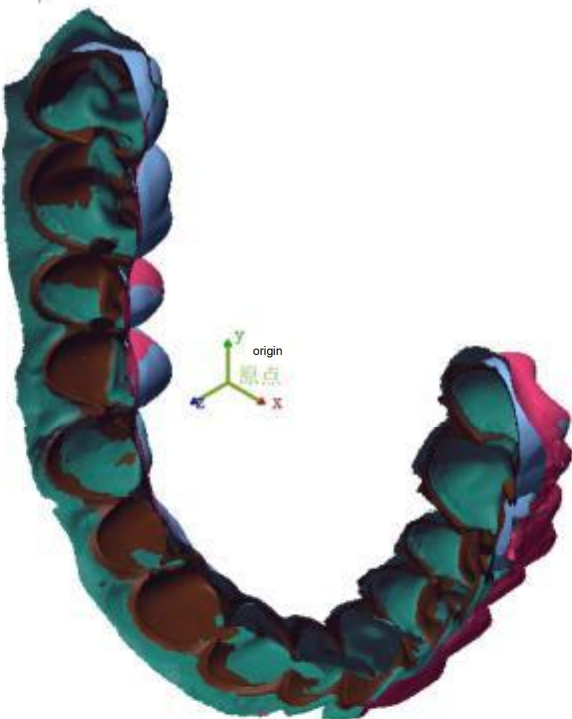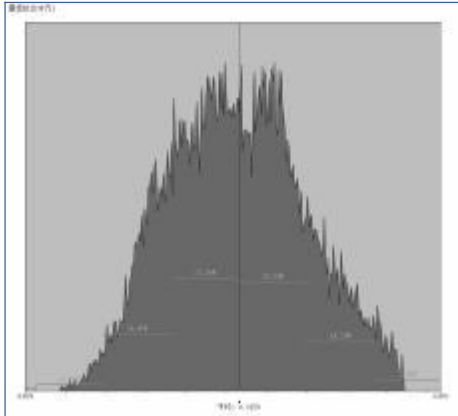

|                    |         |
|--------------------|---------|
| Minimum            | -0.4827 |
| Maximum            | 0.4847  |
| Average            | 0.0159  |
| RMS                | 0.1913  |
| Standard deviation | 0.1906  |
| Dispersion         | 0.0363  |
| +Average           | 0.1669  |
| -Average           | -0.1465 |

|              |                |
|--------------|----------------|
| Product Name | [Product Name] |
| Part Name    | [Part Name]    |

|            |              |
|------------|--------------|
| Department | [Department] |
| Inspector  | [Inspector]  |

|      |              |
|------|--------------|
| Date | Jul 26, 2023 |
| Unit | mm           |

# 结果数据 - 1 : 初始对齐2

Results data-1:Initial alignment2

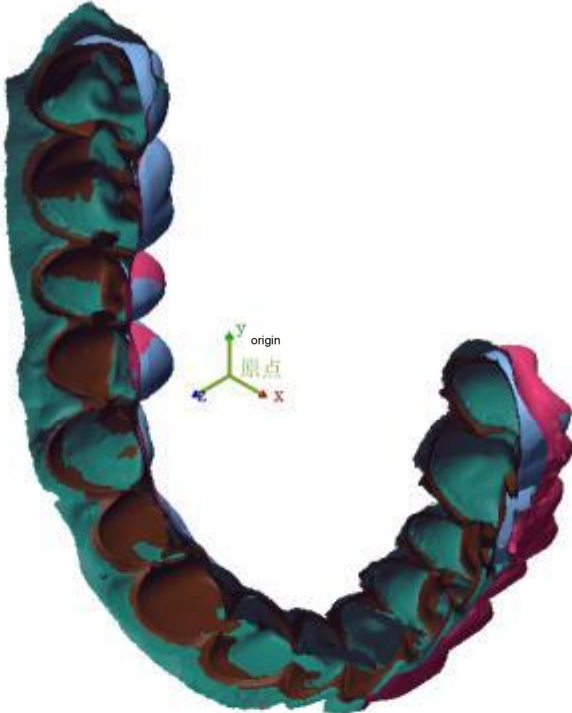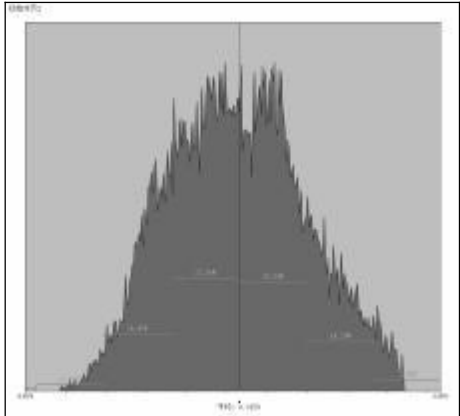

|                    |         |
|--------------------|---------|
| Minimum            | -0.4827 |
| Maximum            | 0.4847  |
| Average            | 0.0159  |
| RMS                | 0.1913  |
| Standard deviation | 0.1906  |
| Dispersion         | 0.0363  |
| +Average           | 0.1669  |
| -Average           | -0.1465 |

|              |                |
|--------------|----------------|
| Product Name | [Product Name] |
| Part Name    | [Part Name]    |

|            |              |
|------------|--------------|
| Department | [Department] |
| Inspector  | [Inspector]  |

|      |              |
|------|--------------|
| Date | Jul 26, 2023 |
| Unit | mm           |

# 结果数据 - 1 : 最佳拟合对齐2

Results data-1:Best-fit alignment2

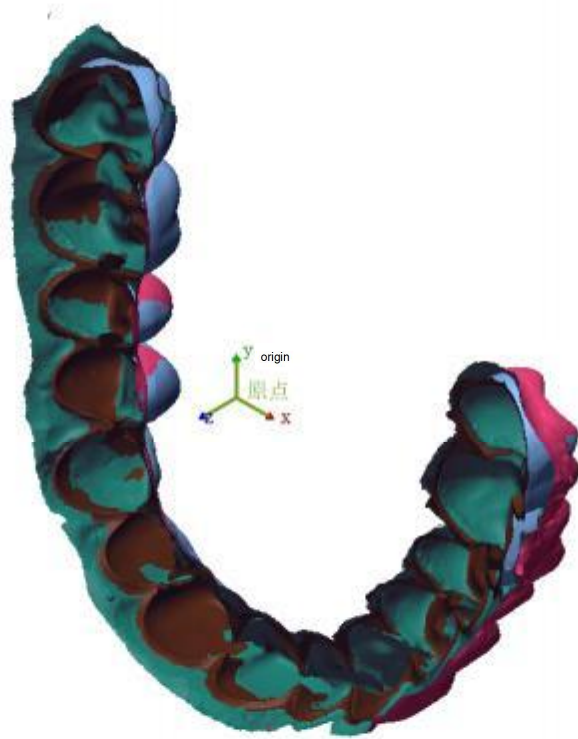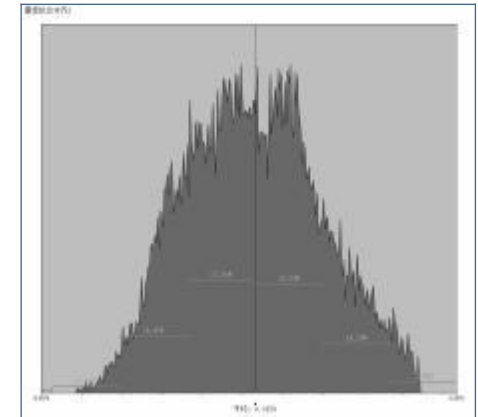

|                    |         |
|--------------------|---------|
| Minimum            | -0.4827 |
| Maximum            | 0.4847  |
| Average            | 0.0159  |
| RMS                | 0.1913  |
| Standard deviation | 0.1906  |
| Dispersion         | 0.0363  |
| +Average           | 0.1669  |
| -Average           | -0.1465 |

|              |                |
|--------------|----------------|
| Product Name | [Product Name] |
| Part Name    | [Part Name]    |

|            |              |
|------------|--------------|
| Department | [Department] |
| Inspector  | [Inspector]  |

|      |              |
|------|--------------|
| Date | Jul 26, 2023 |
| Unit | mm           |

# 结果数据 - 1 : 3D 比较绿11

Results data-1:3D compare Chlorogenic acid11

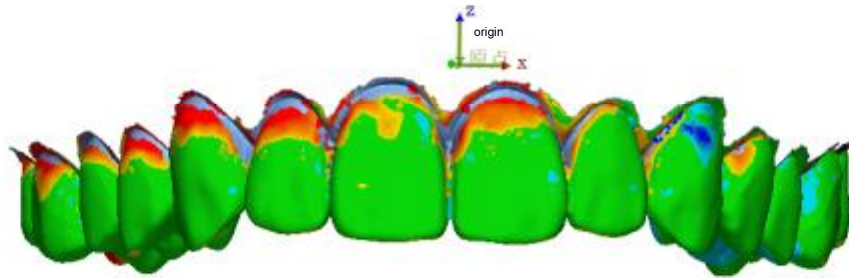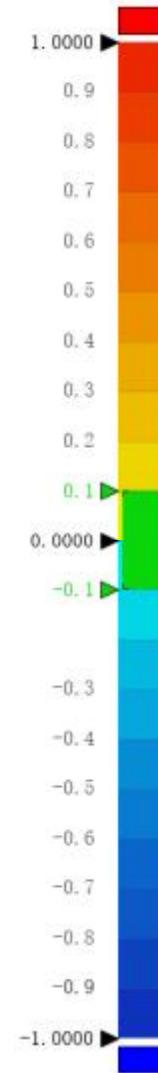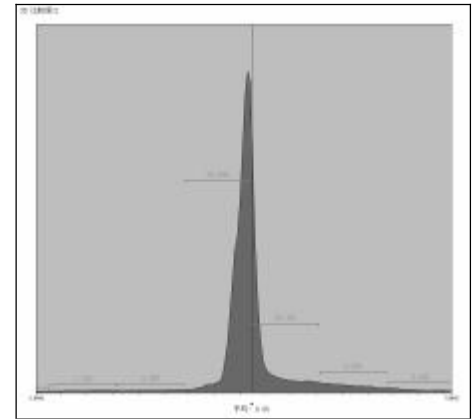

|                      |         |
|----------------------|---------|
| Minimum              | -2.9406 |
| Maximum              | 2.9402  |
| Average              | 0.06    |
| RMS                  | 0.611   |
| Standard deviation   | 0.6081  |
| Dispersion           | 0.3698  |
| +Average             | 0.3434  |
| -Average             | -0.2563 |
| Within Tolerance.(%) | 57.8101 |
| Out Of Tolerance(%)  | 42.1899 |
| Above Tolerance(%)   | 22.6995 |
| Below Tolerance(%)   | 19.4905 |

|              |                |
|--------------|----------------|
| Product Name | [Product Name] |
| Part Name    | [Part Name]    |

|            |              |
|------------|--------------|
| Department | [Department] |
| Inspector  | [Inspector]  |

|      |              |
|------|--------------|
| Date | Jul 26, 2023 |
| Unit | mm           |



| Name                          | Minimum | Maximum | Average | RMS   | Standard deviation | Dispersion | +Average | -Average |
|-------------------------------|---------|---------|---------|-------|--------------------|------------|----------|----------|
| 3D compare Chlorogenic acid11 | -2.9406 | 2.9402  | 0.06    | 0.611 | 0.6081             | 0.3698     | 0.3434   | -0.2563  |

|              |                |            |              |      |              |
|--------------|----------------|------------|--------------|------|--------------|
| Product Name | [Product Name] | Department | [Department] | Date | Jul 18, 2023 |
|              |                | Inspector  | [Inspector]  | Unit | mm           |

|           |             |
|-----------|-------------|
| Part Name | [Part Name] |
|-----------|-------------|

# 结果数据 - 1 : 3D 比较绿12

Results data-1:3D compare Chlorogenic acid12

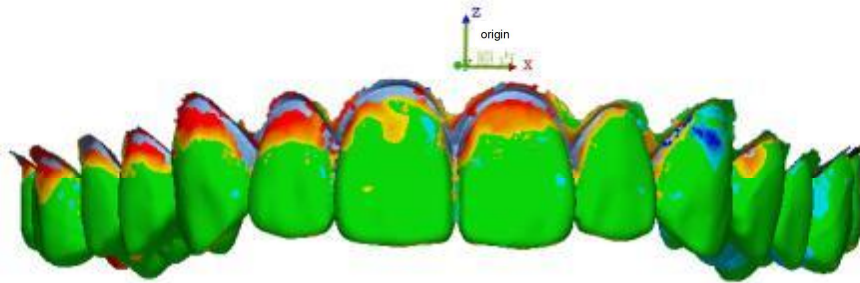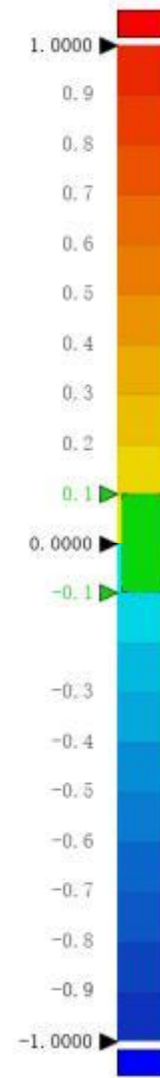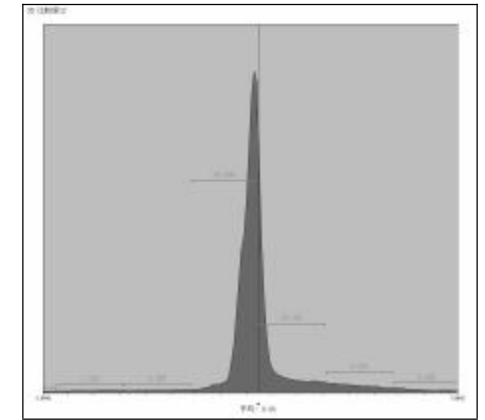

|                     |         |
|---------------------|---------|
| Minimum             | -2.9406 |
| Maximum             | 2.9402  |
| Average             | 0.06    |
| RMS                 | 0.611   |
| Standard deviation  | 0.6081  |
| Dispersion          | 0.3698  |
| +Average            | 0.3434  |
| -Average            | -0.2563 |
| Within Tolerance(%) | 57.8101 |
| Out Of Tolerance(%) | 42.1899 |
| Above Tolerance(%)  | 22.6995 |
| Below Tolerance(%)  | 19.4905 |

|              |                |
|--------------|----------------|
| Product Name | [Product Name] |
| Part Name    | [Part Name]    |

|            |              |
|------------|--------------|
| Department | [Department] |
| Inspector  | [Inspector]  |

|      |              |
|------|--------------|
| Date | Jul 26, 2023 |
| Unit | mm           |

| Name                          | Minimum | Maximum | Average | RMS   | Standard deviation | Dispersion | +Average | -Average |
|-------------------------------|---------|---------|---------|-------|--------------------|------------|----------|----------|
| 3D compare Chlorogenic acid12 | -2.9406 | 2.9402  | 0.06    | 0.611 | 0.6081             | 0.3698     | 0.3434   | -0.2563  |

|              |                |
|--------------|----------------|
| Product Name | [Product Name] |
| Part Name    | [Part Name]    |

|            |              |
|------------|--------------|
| Department | [Department] |
| Inspector  | [Inspector]  |

|      |              |
|------|--------------|
| Date | Jul 18, 2023 |
| Unit | mm           |
