# Supplementary material for: Study on the effect of chlorogenic acid on the antimicrobial effect, physical properties and model accuracy of alginate impression materials
Source: PeerJ journal article supplement (doi:10.7717/peerj.18228), 2024-10-31
Supplement: Effective_chlorine_intervention_group_accuracy.pdf [file Effective_chlorine_intervention_group_accuracy.pdf]

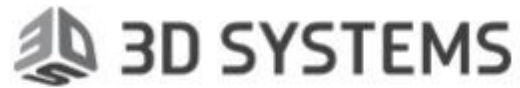

|              |                |
|--------------|----------------|
| Product Name | [Product Name] |
| Part Name    | [Part Name]    |
| Part Number  | [Part Number]  |
| Department   | [Department]   |
| Inspector    | [Inspector]    |
| Date         | Jul 20, 2023   |
| Unit         | mm             |

**Disclaimer**

The results of this analysis and forecastings are believed to be reliable but are not to be construed as providing a warranty, including any warranty of merchantability or fitness for purpose, or representation for which 3D Systems, Inc. assumes legal responsibility. Users should undertake sufficient verification and iterative testing to determine the suitability of any information presented.

Nothing herein is to be taken as permission, inducement or recommendation by 3D Systems, Inc. to practice any patented invention without a license or to in any way infringe upon the intellectual property rights of any other party.

# 结果数据 - 1 : 参考数据 - 初始

Results data-1:Reference data-Initial

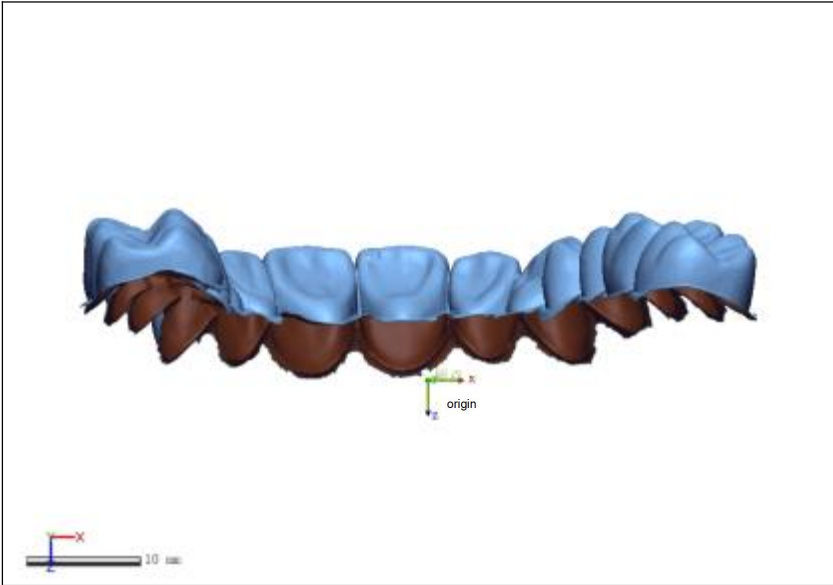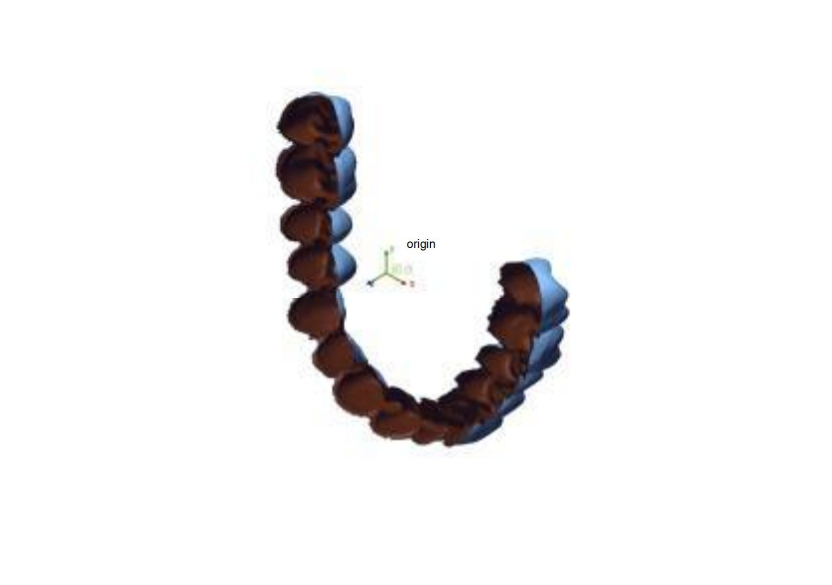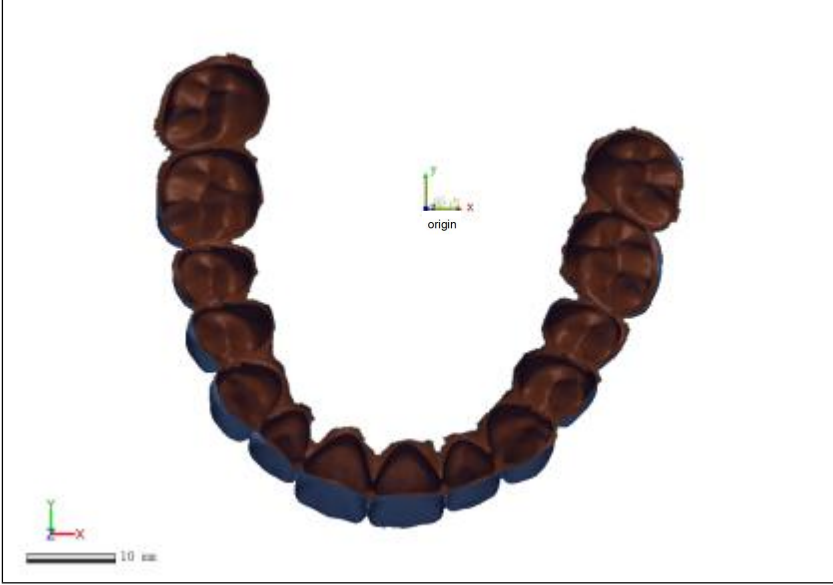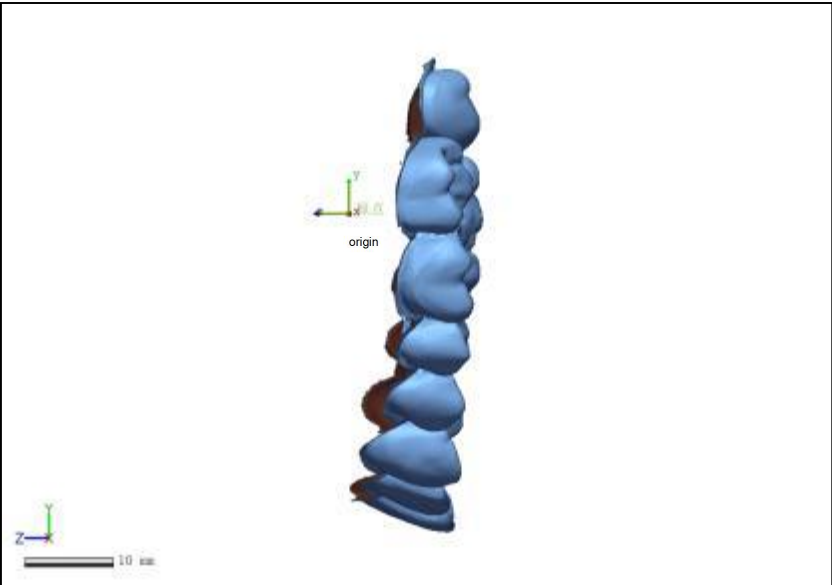

|              |                |
|--------------|----------------|
| Product Name | [Product Name] |
| Part Name    | [Part Name]    |

|            |              |
|------------|--------------|
| Department | [Department] |
| Inspector  | [Inspector]  |

|      |              |
|------|--------------|
| Date | Jul 20, 2023 |
| Unit | mm           |

# 结果数据 - 1 : 测试数据 - 氯喷5

Results data-1:Test Data-Effective chlorine spray5

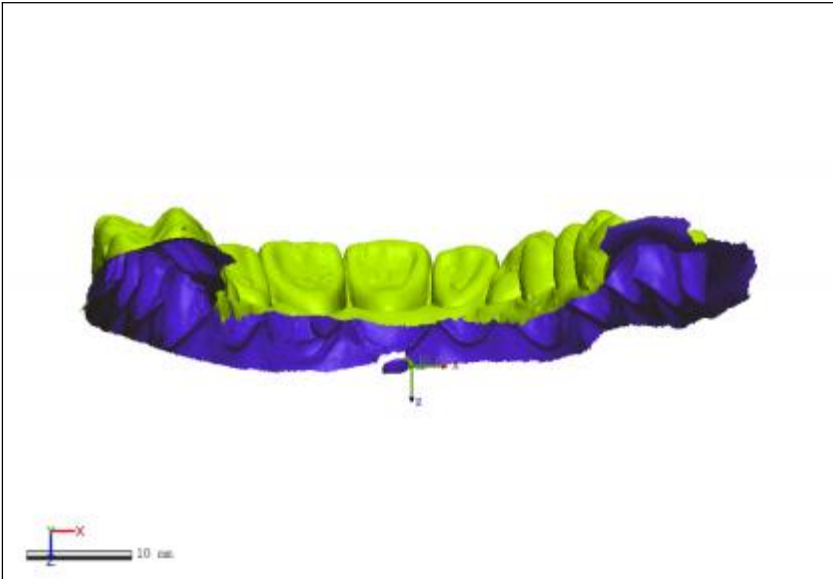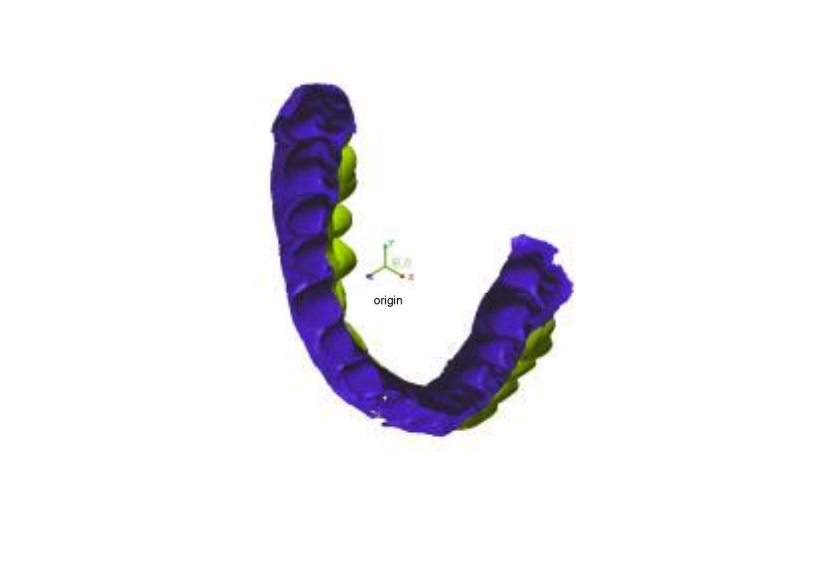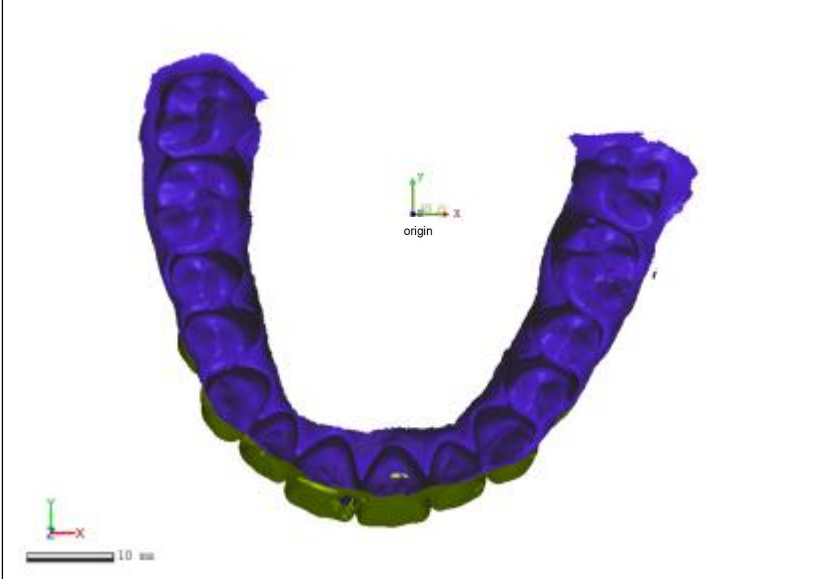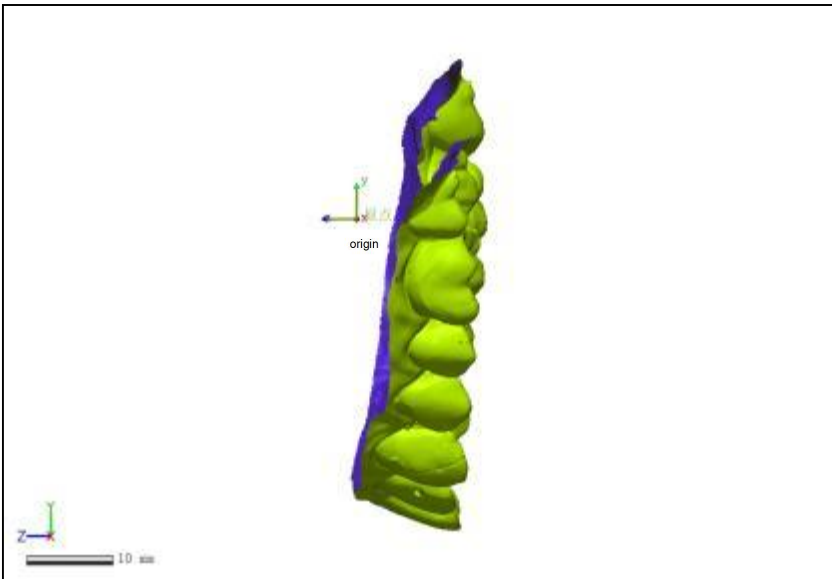

|              |                |
|--------------|----------------|
| Product Name | [Product Name] |
| Part Name    | [Part Name]    |

|            |              |
|------------|--------------|
| Department | [Department] |
| Inspector  | [Inspector]  |

|      |              |
|------|--------------|
| Date | Jul 20, 2023 |
| Unit | mm           |

# 结果数据 - 1 : 初始对齐1

Results data-1:Initial alignment1

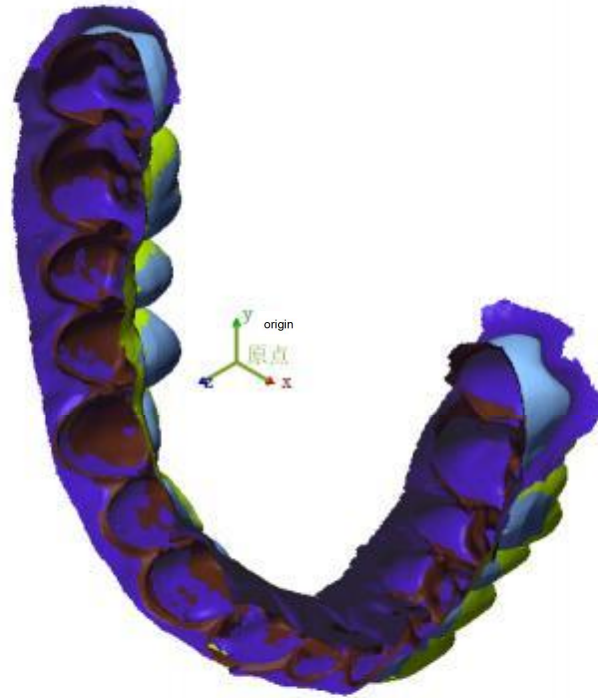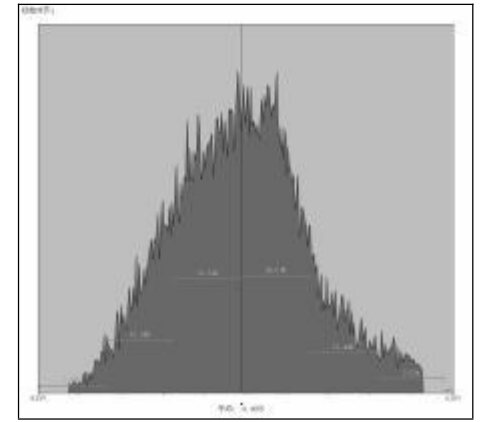

|                    |         |
|--------------------|---------|
| Minimum            | -0.2006 |
| Maximum            | 0.2012  |
| Average            | -0.0055 |
| RMS                | 0.0774  |
| Standard deviation | 0.0772  |
| Dispersion         | 0.006   |
| +Average           | 0.0606  |
| -Average           | -0.0635 |

|              |                |
|--------------|----------------|
| Product Name | [Product Name] |
| Part Name    | [Part Name]    |

|            |              |
|------------|--------------|
| Department | [Department] |
| Inspector  | [Inspector]  |

|      |              |
|------|--------------|
| Date | Jul 20, 2023 |
| Unit | mm           |

# 结果数据 - 1 : 最佳拟合对齐1

Results data-1:Best-fit alignment1

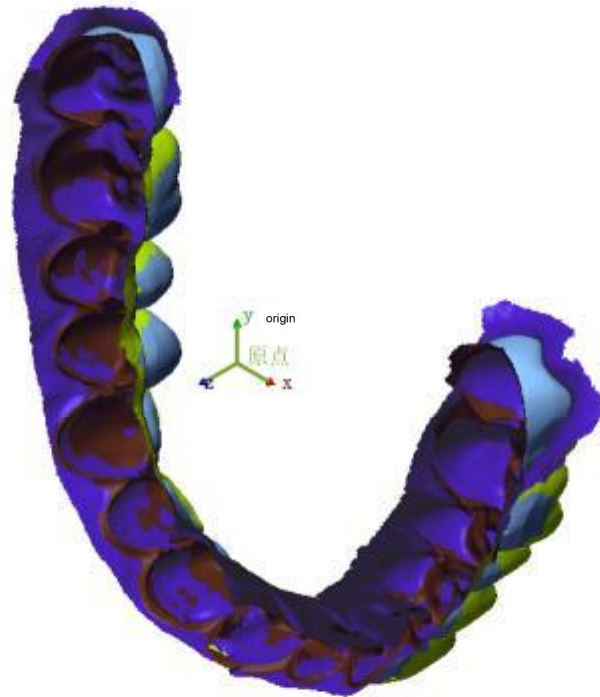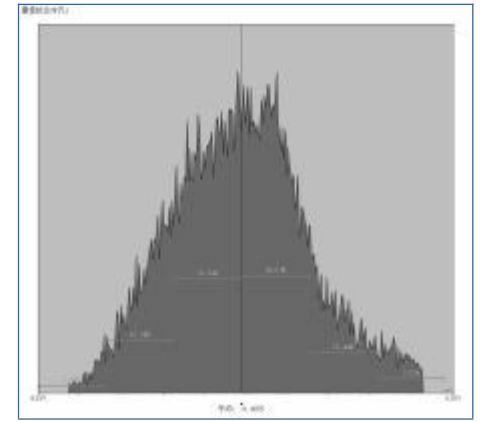

|                    |         |
|--------------------|---------|
| Minimum            | -0.2006 |
| Maximum            | 0.2012  |
| Average            | -0.0055 |
| RMS                | 0.0774  |
| Standard deviation | 0.0772  |
| Dispersion         | 0.006   |
| +Average           | 0.0606  |
| -Average           | -0.0635 |

|              |                |
|--------------|----------------|
| Product Name | [Product Name] |
| Part Name    | [Part Name]    |

|            |              |
|------------|--------------|
| Department | [Department] |
| Inspector  | [Inspector]  |

|      |              |
|------|--------------|
| Date | Jul 20, 2023 |
| Unit | mm           |

# 结果数据 - 1 : 初始对齐2

Results data-1:Initial alignment2

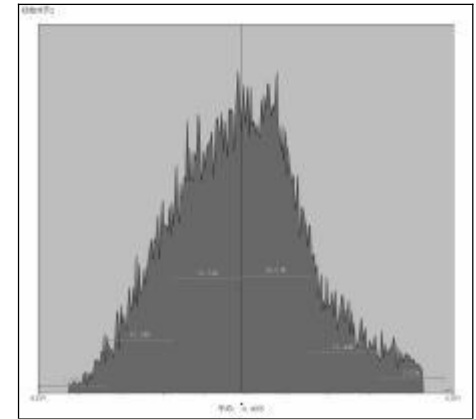

|                    |         |
|--------------------|---------|
| Minimum            | -0.2006 |
| Maximum            | 0.2012  |
| Average            | -0.0055 |
| RMS                | 0.0774  |
| Standard deviation | 0.0772  |
| Dispersion         | 0.006   |
| +Average           | 0.0606  |
| -Average           | -0.0635 |

|              |                |
|--------------|----------------|
| Product Name | [Product Name] |
| Part Name    | [Part Name]    |

|            |              |
|------------|--------------|
| Department | [Department] |
| Inspector  | [Inspector]  |

|      |              |
|------|--------------|
| Date | Jul 20, 2023 |
| Unit | mm           |

# 结果数据 - 1 : 最佳拟合对齐2

Results data-1:Best-fit alignment2

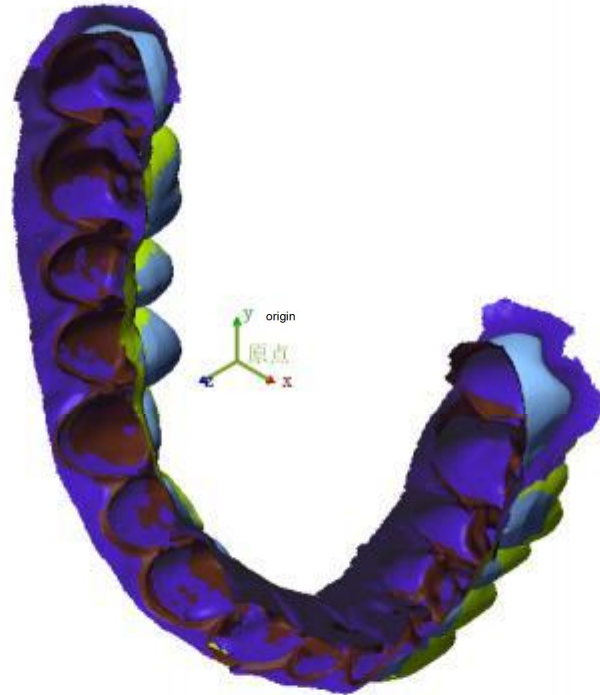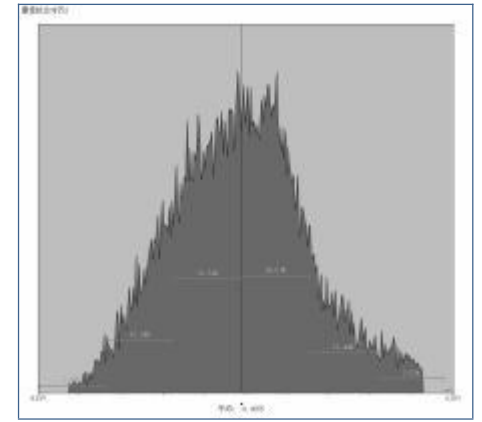

|                    |         |
|--------------------|---------|
| Minimum            | -0.2006 |
| Maximum            | 0.2012  |
| Average            | -0.0055 |
| RMS                | 0.0774  |
| Standard deviation | 0.0772  |
| Dispersion         | 0.006   |
| +Average           | 0.0606  |
| -Average           | -0.0635 |

|              |                |
|--------------|----------------|
| Product Name | [Product Name] |
| Part Name    | [Part Name]    |

|            |              |
|------------|--------------|
| Department | [Department] |
| Inspector  | [Inspector]  |

|      |              |
|------|--------------|
| Date | Jul 20, 2023 |
| Unit | mm           |

# 结果数据 - 1 : 初始对齐3

Results data-1:Initial alignment3

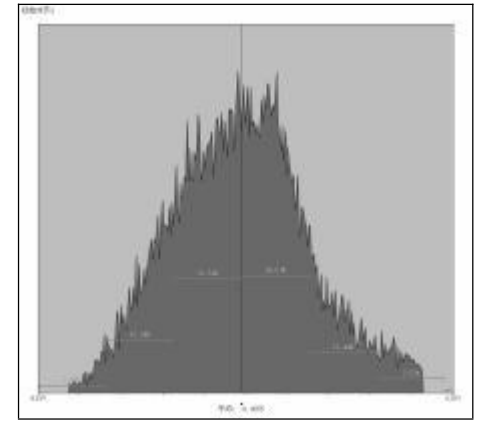

|                    |         |
|--------------------|---------|
| Minimum            | -0.2006 |
| Maximum            | 0.2012  |
| Average            | -0.0055 |
| RMS                | 0.0774  |
| Standard deviation | 0.0772  |
| Dispersion         | 0.006   |
| +Average           | 0.0606  |
| -Average           | -0.0635 |

|              |                |
|--------------|----------------|
| Product Name | [Product Name] |
| Part Name    | [Part Name]    |

|            |              |
|------------|--------------|
| Department | [Department] |
| Inspector  | [Inspector]  |

|      |              |
|------|--------------|
| Date | Jul 20, 2023 |
| Unit | mm           |



# 结果数据 - 1 : 最佳拟合对齐3

Results data-1:Best-fit alignment3

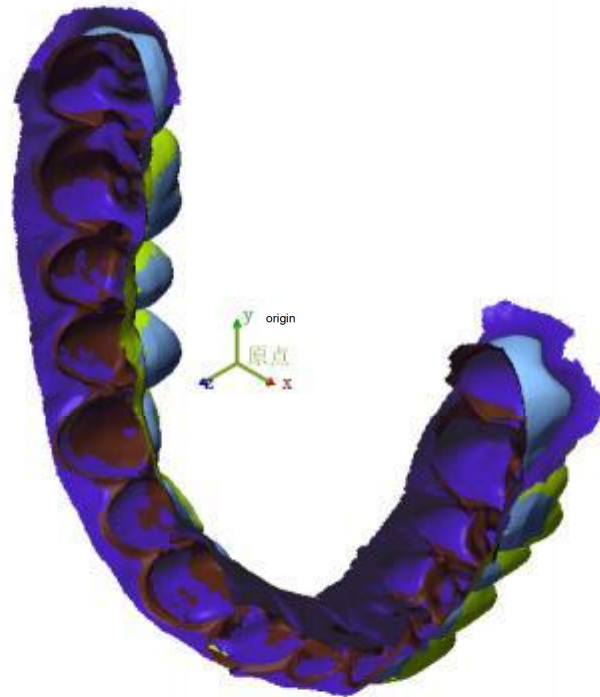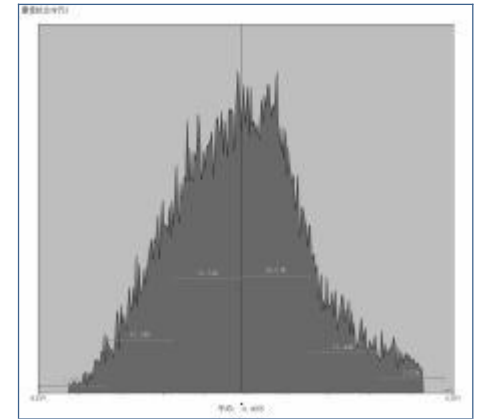

|                    |         |
|--------------------|---------|
| Minimum            | -0.2006 |
| Maximum            | 0.2012  |
| Average            | -0.0055 |
| RMS                | 0.0774  |
| Standard deviation | 0.0772  |
| Dispersion         | 0.006   |
| +Average           | 0.0606  |
| -Average           | -0.0635 |

|              |                |
|--------------|----------------|
| Product Name | [Product Name] |
| Part Name    | [Part Name]    |

|            |              |
|------------|--------------|
| Department | [Department] |
| Inspector  | [Inspector]  |

|      |              |
|------|--------------|
| Date | Jul 20, 2023 |
| Unit | mm           |

# 结果数据 - 1 : 初始对齐4

Results data-1:Initial alignment4

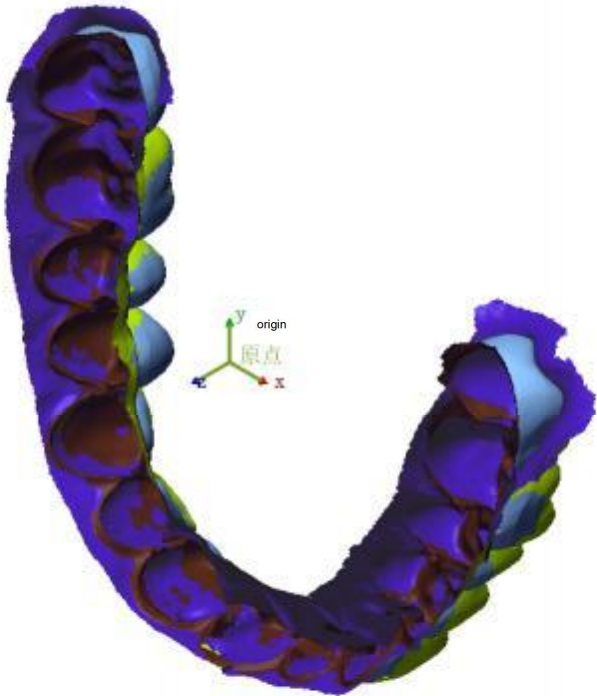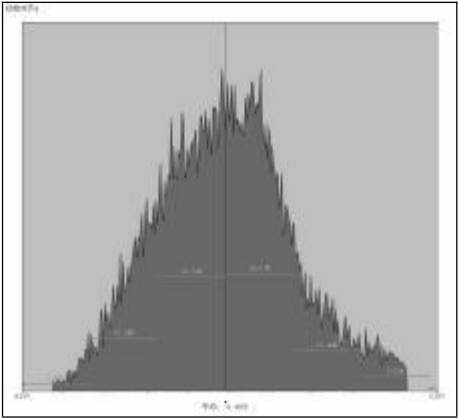

|                    |         |
|--------------------|---------|
| Minimum            | -0.2006 |
| Maximum            | 0.2012  |
| Average            | -0.0055 |
| RMS                | 0.0774  |
| Standard deviation | 0.0772  |
| Dispersion         | 0.006   |
| +Average           | 0.0606  |
| -Average           | -0.0635 |

|              |                |
|--------------|----------------|
| Product Name | [Product Name] |
| Part Name    | [Part Name]    |

|            |              |
|------------|--------------|
| Department | [Department] |
| Inspector  | [Inspector]  |

|      |              |
|------|--------------|
| Date | Jul 20, 2023 |
| Unit | mm           |

# 结果数据 - 1 : 最佳拟合对齐4

Results data-1:Best-fit alignment4

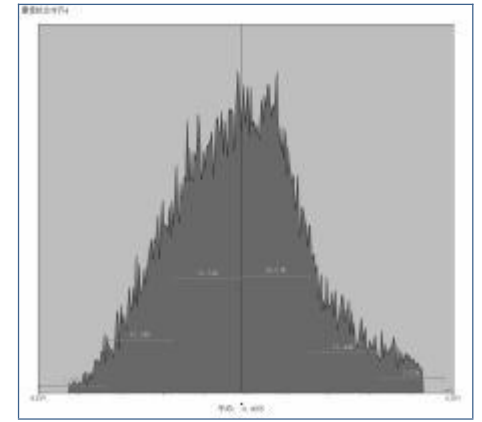

|                    |         |
|--------------------|---------|
| Minimum            | -0.2006 |
| Maximum            | 0.2012  |
| Average            | -0.0055 |
| RMS                | 0.0774  |
| Standard deviation | 0.0772  |
| Dispersion         | 0.006   |
| +Average           | 0.0606  |
| -Average           | -0.0635 |

|              |                |
|--------------|----------------|
| Product Name | [Product Name] |
| Part Name    | [Part Name]    |

|            |              |
|------------|--------------|
| Department | [Department] |
| Inspector  | [Inspector]  |

|      |              |
|------|--------------|
| Date | Jul 20, 2023 |
| Unit | mm           |

# 结果数据 - 1 : 初始对齐5

Results data-1:Initial alignment5

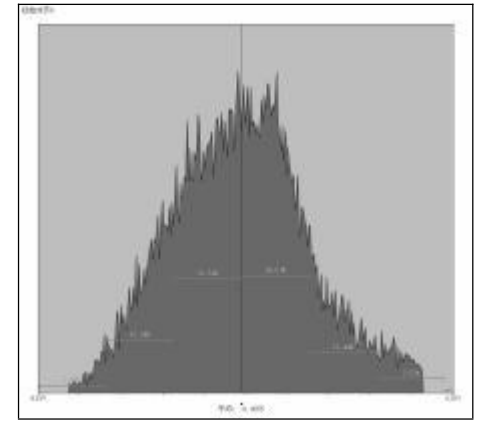

|                    |         |
|--------------------|---------|
| Minimum            | -0.2006 |
| Maximum            | 0.2012  |
| Average            | -0.0055 |
| RMS                | 0.0774  |
| Standard deviation | 0.0772  |
| Dispersion         | 0.006   |
| +Average           | 0.0606  |
| -Average           | -0.0635 |

|              |                |
|--------------|----------------|
| Product Name | [Product Name] |
| Part Name    | [Part Name]    |

|            |              |
|------------|--------------|
| Department | [Department] |
| Inspector  | [Inspector]  |

|      |              |
|------|--------------|
| Date | Jul 20, 2023 |
| Unit | mm           |

# 结果数据 - 1 : 最佳拟合对齐5

Results data-1:Best-fit alignment5

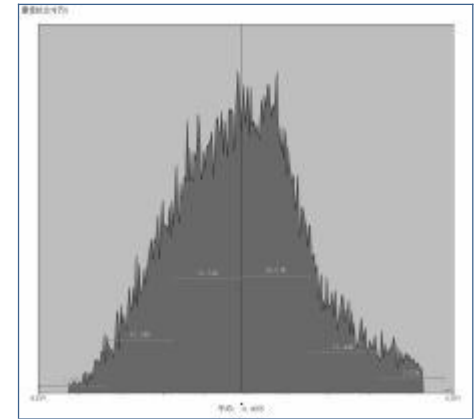

|                    |         |
|--------------------|---------|
| Minimum            | -0.2006 |
| Maximum            | 0.2012  |
| Average            | -0.0055 |
| RMS                | 0.0774  |
| Standard deviation | 0.0772  |
| Dispersion         | 0.006   |
| +Average           | 0.0606  |
| -Average           | -0.0635 |

|              |                |
|--------------|----------------|
| Product Name | [Product Name] |
| Part Name    | [Part Name]    |

|            |              |
|------------|--------------|
| Department | [Department] |
| Inspector  | [Inspector]  |

|      |              |
|------|--------------|
| Date | Jul 20, 2023 |
| Unit | mm           |

# 结果数据 - 1 : 3D 比较氯喷1

Results data-1:3D compare Effective chlorine spray1

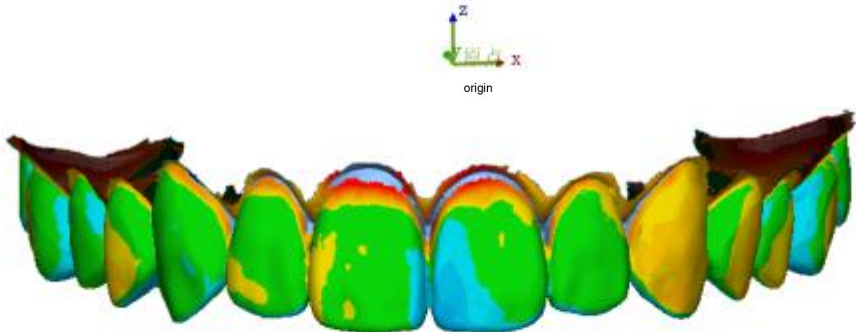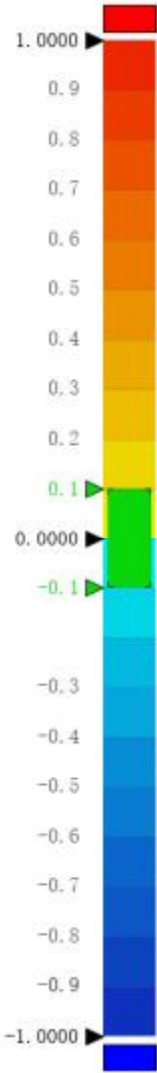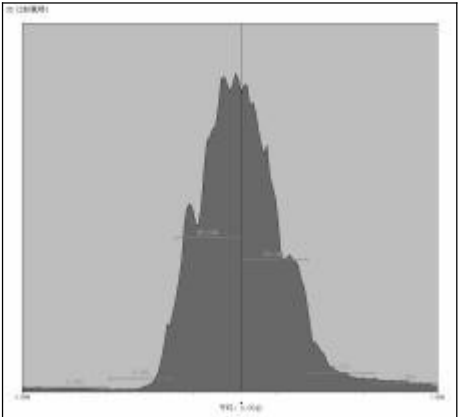

|                     |         |
|---------------------|---------|
| Minimum             | -2.0032 |
| Maximum             | 2.0033  |
| Average             | 0.0542  |
| RMS                 | 0.3695  |
| Standard deviation  | 0.3655  |
| Dispersion          | 0.1336  |
| +Average            | 0.2553  |
| -Average            | -0.2133 |
| Within Tolerance(%) | 32.9284 |
| Out Of Tolerance(%) | 67.0716 |
| Above Tolerance(%)  | 40.2889 |
| Below Tolerance(%)  | 26.7827 |

|              |                |
|--------------|----------------|
| Product Name | [Product Name] |
| Part Name    | [Part Name]    |

|            |              |
|------------|--------------|
| Department | [Department] |
| Inspector  | [Inspector]  |

|      |              |
|------|--------------|
| Date | Jul 20, 2023 |
|------|--------------|

|      |    |
|------|----|
| Unit | mm |
|------|----|

| Name                                 | Minimum | Maximum | Average | RMS    | Standard deviation | Dispersion | +Average | -Average |
|--------------------------------------|---------|---------|---------|--------|--------------------|------------|----------|----------|
| 3D compare Effective chlorine spray1 | -2.0032 | 2.0033  | 0.0542  | 0.3695 | 0.3655             | 0.1336     | 0.2553   | -0.2133  |

|              |                |
|--------------|----------------|
| Product Name | [Product Name] |
| Part Name    | [Part Name]    |

|            |              |
|------------|--------------|
| Department | [Department] |
| Inspector  | [Inspector]  |

|      |              |
|------|--------------|
| Date | Jul 18, 2023 |
| Unit | mm           |





# 结果数据 - 1 : 3D 比较氯喷2

Results data-1:3D compare Effective chlorine spray2

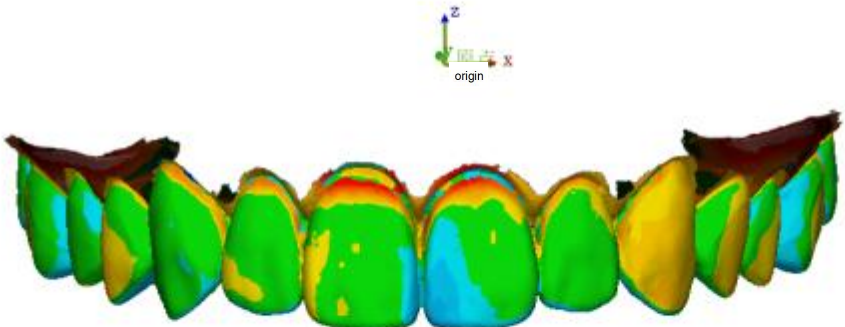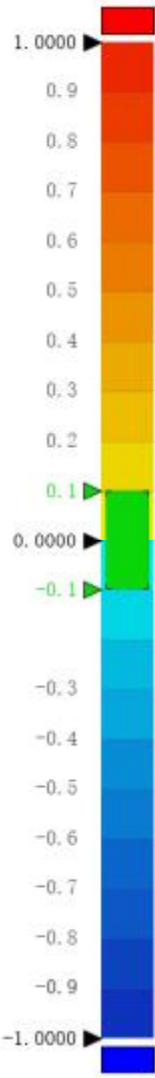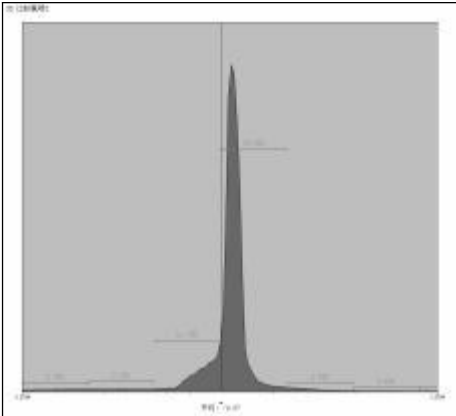

|                     |         |
|---------------------|---------|
| Minimum             | -2.3469 |
| Maximum             | 2.3449  |
| Average             | -0.07   |
| RMS                 | 0.4421  |
| Standard deviation  | 0.4365  |
| Dispersion          | 0.1905  |
| +Average            | 0.1351  |
| -Average            | -0.2383 |
| Within Tolerance(%) | 71.4055 |
| Out Of Tolerance(%) | 28.5945 |
| Above Tolerance(%)  | 9.1144  |
| Below Tolerance(%)  | 19.4801 |

|              |                |
|--------------|----------------|
| Product Name | [Product Name] |
| Part Name    | [Part Name]    |

|            |              |
|------------|--------------|
| Department | [Department] |
| Inspector  | [Inspector]  |

|      |              |
|------|--------------|
| Date | Jul 20, 2023 |
| Unit | mm           |



| Name                                 | Minimum | Maximum | Average | RMS    | Standard deviation | Dispersion | +Average | -Average |
|--------------------------------------|---------|---------|---------|--------|--------------------|------------|----------|----------|
| 3D compare Effective chlorine spray2 | -2.3469 | 2.3449  | -0.07   | 0.4421 | 0.4365             | 0.1905     | 0.1351   | -0.2383  |

|              |                |
|--------------|----------------|
| Product Name | [Product Name] |
| Part Name    | [Part Name]    |

|            |              |
|------------|--------------|
| Department | [Department] |
| Inspector  | [Inspector]  |

|      |              |
|------|--------------|
| Date | Jul 18, 2023 |
| Unit | mm           |



# 结果数据 - 1 : 3D 比较氯喷3

Results data-1:3D compare Effective chlorine spray3

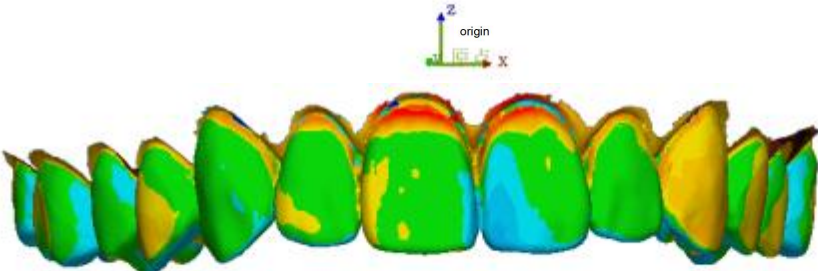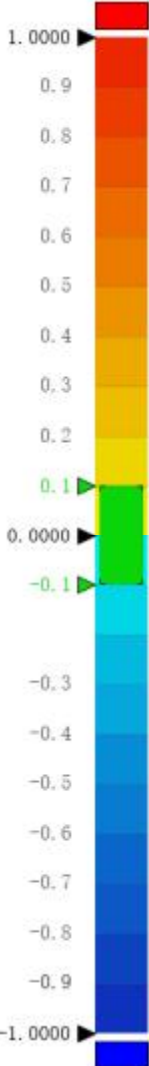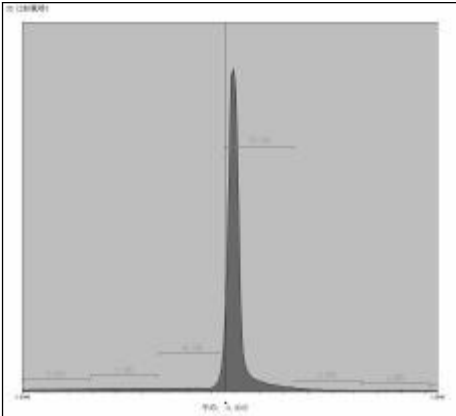

|                     |         |
|---------------------|---------|
| Minimum             | -2.8981 |
| Maximum             | 2.898   |
| Average             | -0.0505 |
| RMS                 | 0.65    |
| Standard deviation  | 0.648   |
| Dispersion          | 0.42    |
| +Average            | 0.2229  |
| -Average            | -0.3957 |
| Within Tolerance(%) | 69.6575 |
| Out Of Tolerance(%) | 30.3425 |
| Above Tolerance(%)  | 15.5967 |
| Below Tolerance(%)  | 14.7459 |

|              |                |
|--------------|----------------|
| Product Name | [Product Name] |
| Part Name    | [Part Name]    |

|            |              |
|------------|--------------|
| Department | [Department] |
| Inspector  | [Inspector]  |

|      |              |
|------|--------------|
| Date | Jul 20, 2023 |
| Unit | mm           |



| Name                                 | Minimum | Maximum | Average | RMS  | Standard deviation | Dispersion | +Average | -Average |
|--------------------------------------|---------|---------|---------|------|--------------------|------------|----------|----------|
| 3D compare Effective chlorine spray3 | -2.8981 | 2.898   | -0.0505 | 0.65 | 0.648              | 0.42       | 0.2229   | -0.3957  |

|              |                |
|--------------|----------------|
| Product Name | [Product Name] |
| Part Name    | [Part Name]    |

|            |              |
|------------|--------------|
| Department | [Department] |
| Inspector  | [Inspector]  |

|      |              |
|------|--------------|
| Date | Jul 18, 2023 |
| Unit | mm           |





# 结果数据 - 1 : 3D 比较氯喷4

Results data-1:3D compare Effective chlorine spray4

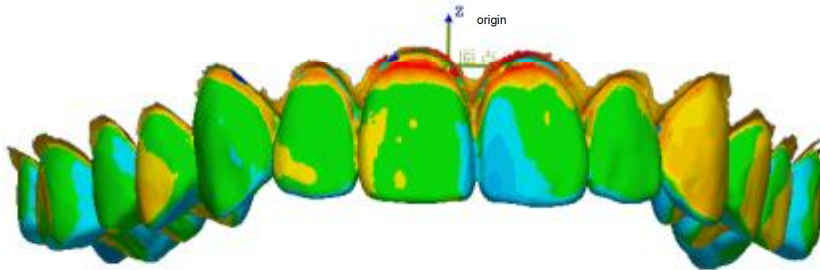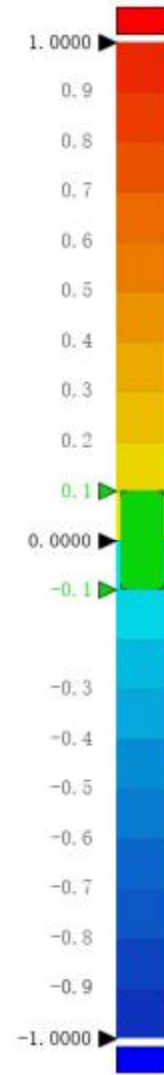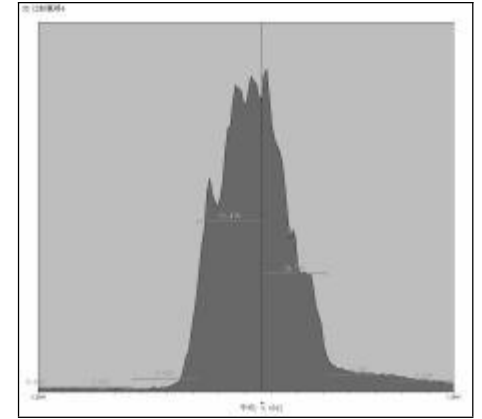

|                     |         |
|---------------------|---------|
| Minimum             | -2.0369 |
| Maximum             | 2.0368  |
| Average             | 0.0912  |
| RMS                 | 0.4079  |
| Standard deviation  | 0.3976  |
| Dispersion          | 0.1581  |
| +Average            | 0.2994  |
| -Average            | -0.2004 |
| Within Tolerance(%) | 31.3173 |
| Out Of Tolerance(%) | 68.6827 |
| Above Tolerance(%)  | 42.4652 |
| Below Tolerance(%)  | 26.2175 |

|              |                |
|--------------|----------------|
| Product Name | [Product Name] |
| Part Name    | [Part Name]    |

|            |              |
|------------|--------------|
| Department | [Department] |
| Inspector  | [Inspector]  |

|      |              |
|------|--------------|
| Date | Jul 20, 2023 |
| Unit | mm           |



| Name                                 | Minimum | Maximum | Average | RMS    | Standard deviation | Dispersion | +Average | -Average |
|--------------------------------------|---------|---------|---------|--------|--------------------|------------|----------|----------|
| 3D compare Effective chlorine spray4 | -2.0369 | 2.0368  | 0.0912  | 0.4079 | 0.3976             | 0.1581     | 0.2994   | -0.2004  |

|              |                |
|--------------|----------------|
| Product Name | [Product Name] |
| Part Name    | [Part Name]    |

|            |              |
|------------|--------------|
| Department | [Department] |
| Inspector  | [Inspector]  |

|      |              |
|------|--------------|
| Date | Jul 18, 2023 |
| Unit | mm           |



# 结果数据 - 1 : 3D 比较氯喷5

Results data-1:3D compare Effective chlorine spray5

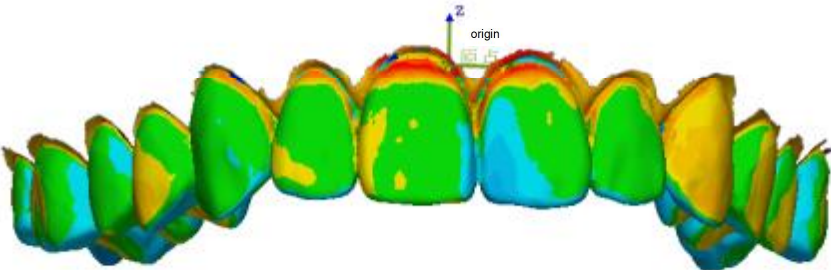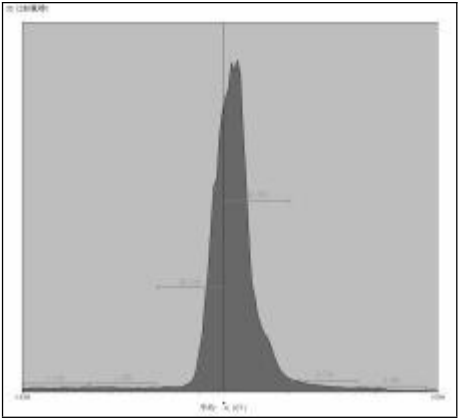

|                      |         |
|----------------------|---------|
| Minimum              | -1.8613 |
| Maximum              | 1.861   |
| Average              | -0.0371 |
| RMS                  | 0.335   |
| Standard deviation   | 0.3329  |
| Dispersion           | 0.1108  |
| +Average             | 0.1294  |
| -Average             | -0.1866 |
| Within Tolerance.(%) | 66.9682 |
| Out Of Tolerance(%)  | 33.0318 |
| Above Tolerance(%)   | 15.4924 |
| Below Tolerance(%)   | 17.5394 |

|              |                |
|--------------|----------------|
| Product Name | [Product Name] |
| Part Name    | [Part Name]    |

|            |              |
|------------|--------------|
| Department | [Department] |
| Inspector  | [Inspector]  |

|      |              |
|------|--------------|
| Date | Jul 20, 2023 |
| Unit | mm           |



| Name                                 | Minimum | Maximum | Average | RMS   | Standard deviation | Dispersion | +Average | -Average |
|--------------------------------------|---------|---------|---------|-------|--------------------|------------|----------|----------|
| 3D compare Effective chlorine spray5 | -1.8613 | 1.861   | -0.0371 | 0.335 | 0.3329             | 0.1108     | 0.1294   | -0.1866  |

|              |                |
|--------------|----------------|
| Product Name | [Product Name] |
| Part Name    | [Part Name]    |

|            |              |
|------------|--------------|
| Department | [Department] |
| Inspector  | [Inspector]  |

|      |              |
|------|--------------|
| Date | Jul 18, 2023 |
| Unit | mm           |





# 结果数据 - 1 : 参考数据 - 初始

Results data-1:Reference data-Initial

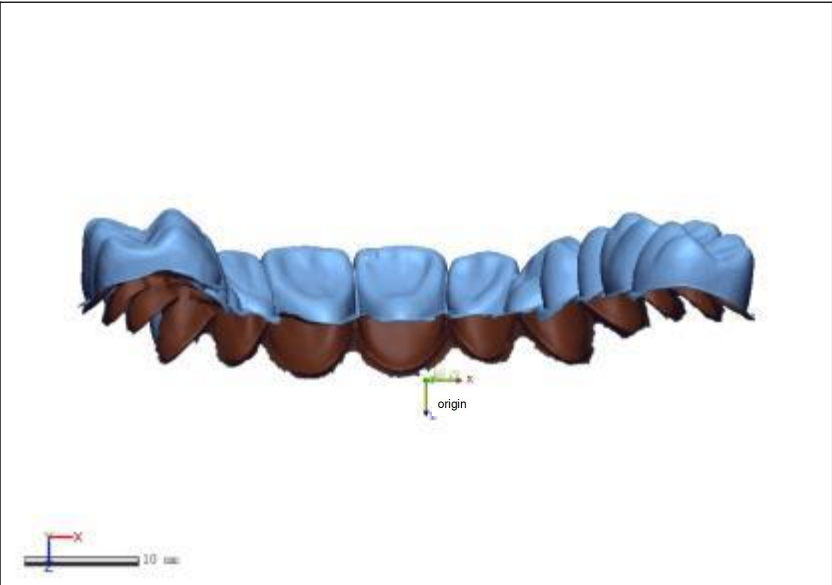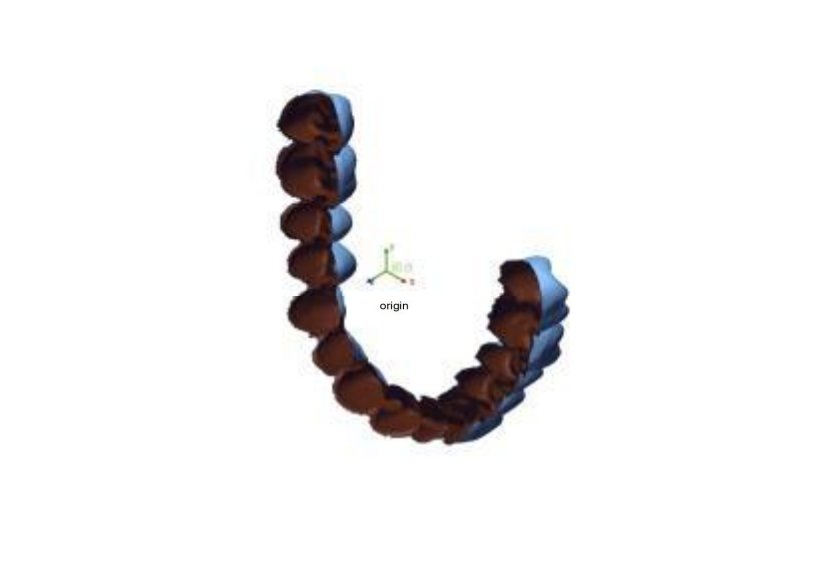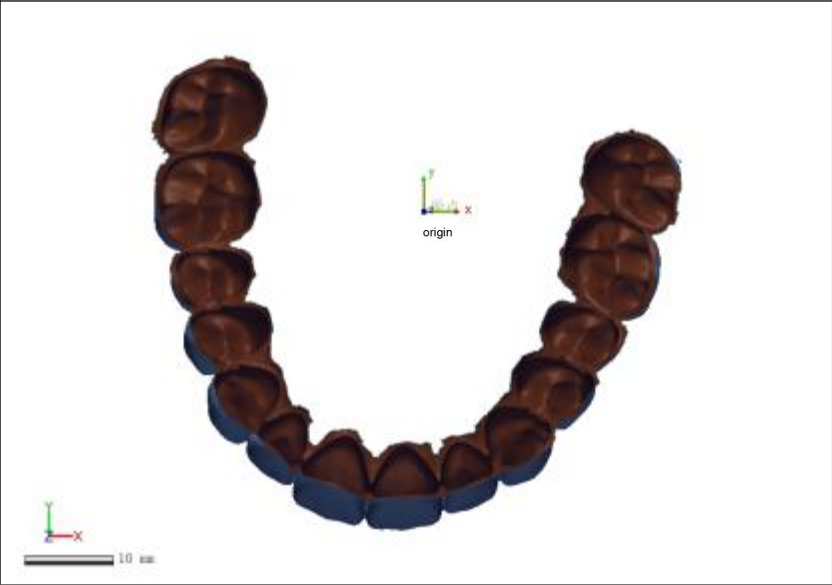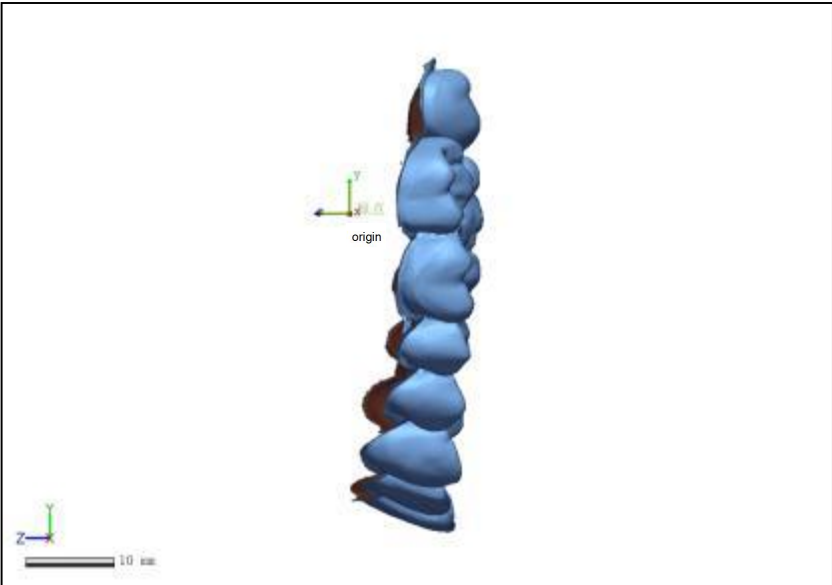

|              |                |
|--------------|----------------|
| Product Name | [Product Name] |
| Part Name    | [Part Name]    |

|            |              |
|------------|--------------|
| Department | [Department] |
| Inspector  | [Inspector]  |

|      |              |
|------|--------------|
| Date | Jul 25, 2023 |
| Unit | mm           |



# v结果数据 - 1 : 测试数据 - 氯10

Results data-1: Test Data-Effective Chlorine10

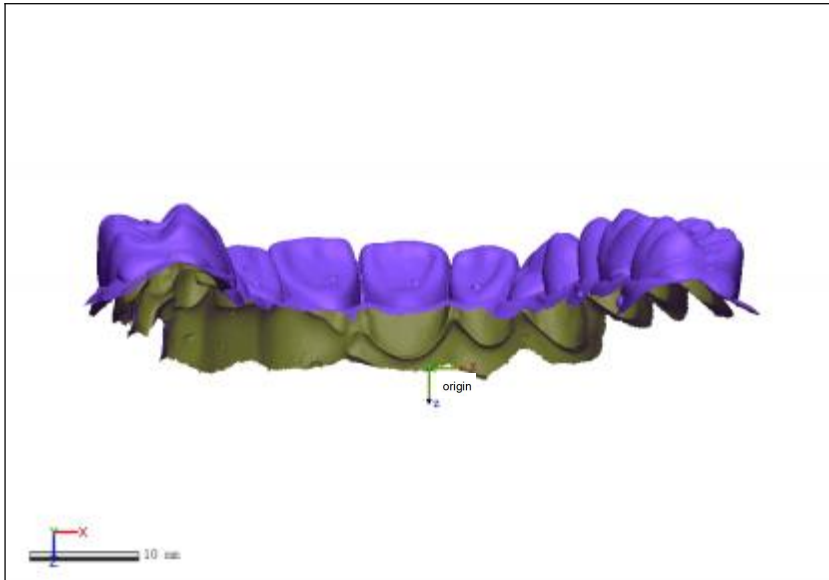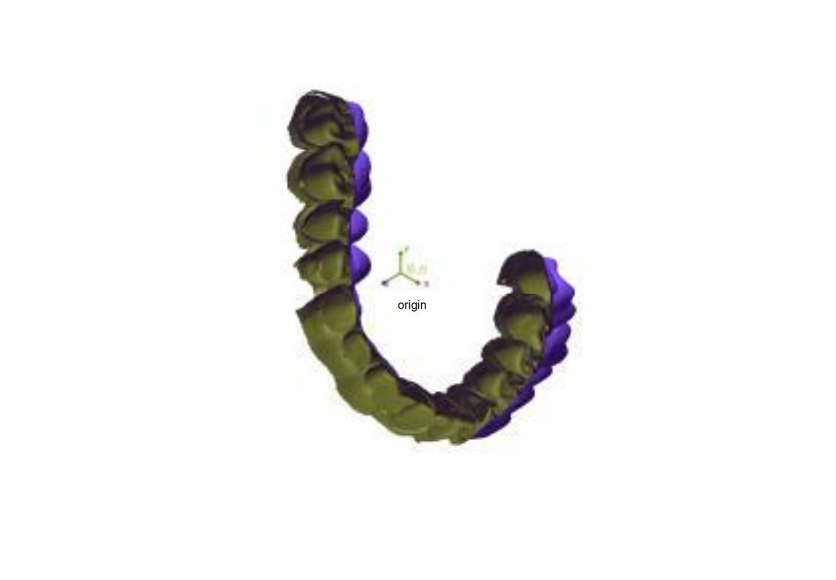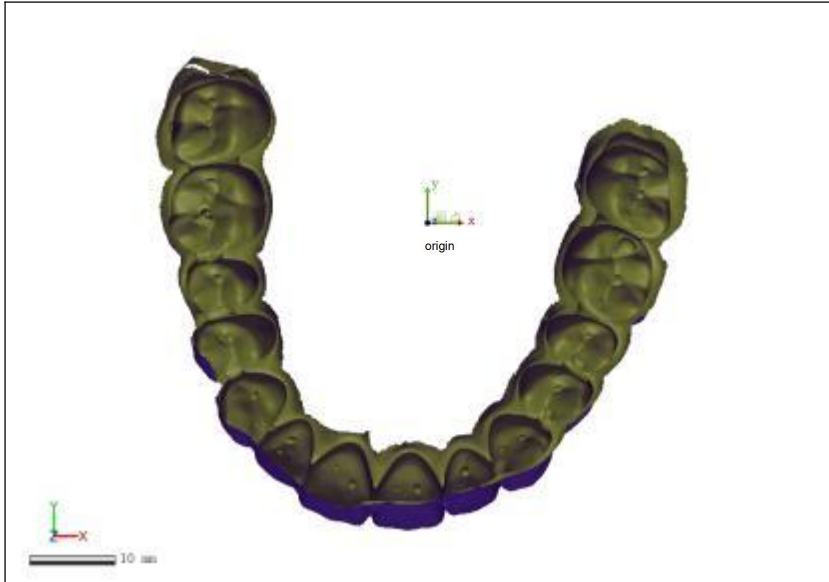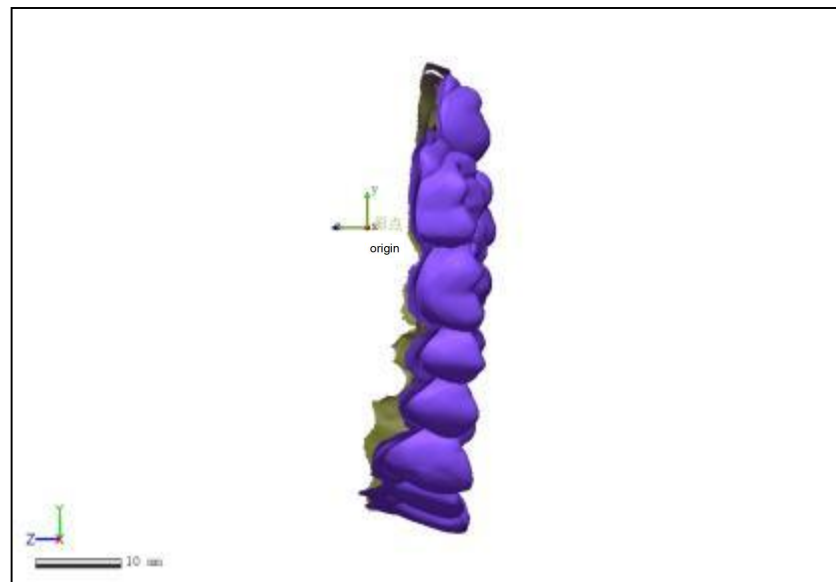

|              |                |
|--------------|----------------|
| Product Name | [Product Name] |
| Part Name    | [Part Name]    |

|            |              |
|------------|--------------|
| Department | [Department] |
| Inspector  | [Inspector]  |

|      |              |
|------|--------------|
| Date | Jul 25, 2023 |
| Unit | mm           |

# 结果数据 - 1 : 初始对齐1

Results data-1:Initial alignment1

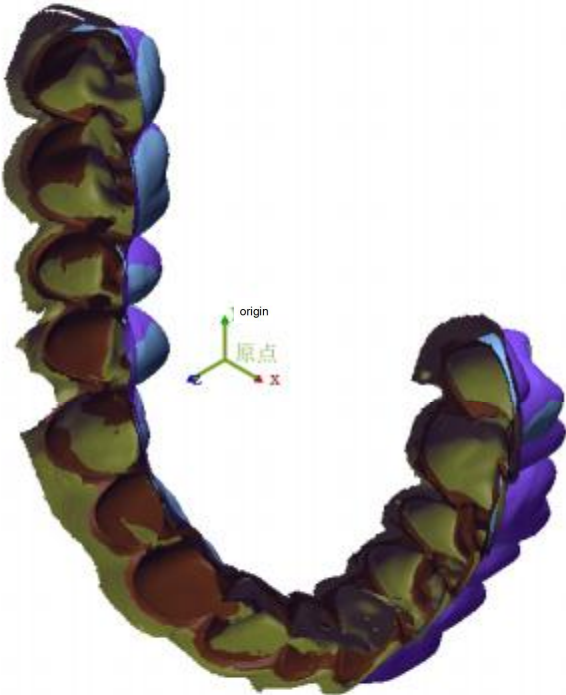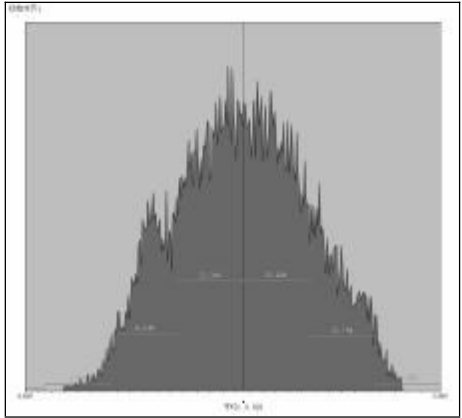

|                    |         |
|--------------------|---------|
| Minimum            | -0.4837 |
| Maximum            | 0.4857  |
| Average            | 0.028   |
| RMS                | 0.1923  |
| Standard deviation | 0.1902  |
| Dispersion         | 0.0362  |
| +Average           | 0.1687  |
| -Average           | -0.1452 |

|              |                |
|--------------|----------------|
| Product Name | [Product Name] |
| Part Name    | [Part Name]    |

|            |              |
|------------|--------------|
| Department | [Department] |
| Inspector  | [Inspector]  |

|      |              |
|------|--------------|
| Date | Jul 25, 2023 |
| Unit | mm           |

# 结果数据 - 1 : 最佳拟合对齐1

Results data-1:Best-fit alignment1

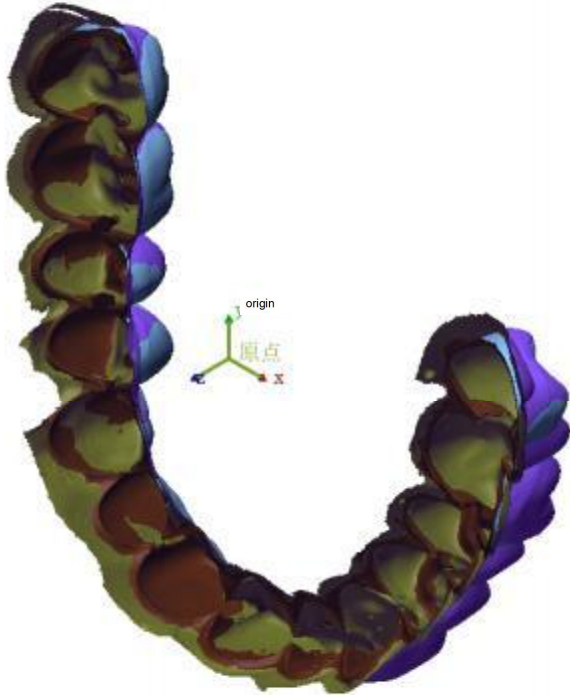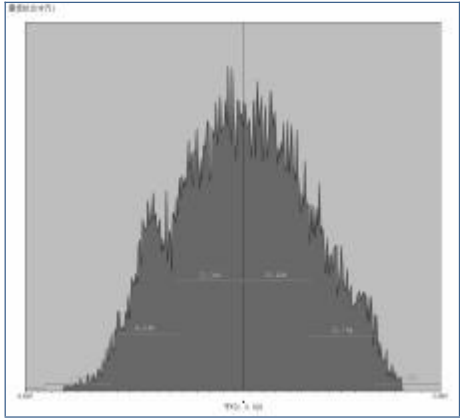

|                    |         |
|--------------------|---------|
| Minimum            | -0.4837 |
| Maximum            | 0.4857  |
| Average            | 0.028   |
| RMS                | 0.1923  |
| Standard deviation | 0.1902  |
| Dispersion         | 0.0362  |
| +Average           | 0.1687  |
| -Average           | -0.1452 |

|              |                |
|--------------|----------------|
| Product Name | [Product Name] |
| Part Name    | [Part Name]    |

|            |              |
|------------|--------------|
| Department | [Department] |
| Inspector  | [Inspector]  |

|      |              |
|------|--------------|
| Date | Jul 25, 2023 |
| Unit | mm           |

# 结果数据 - 1 : 初始对齐2

Results data-1:Initial alignment2

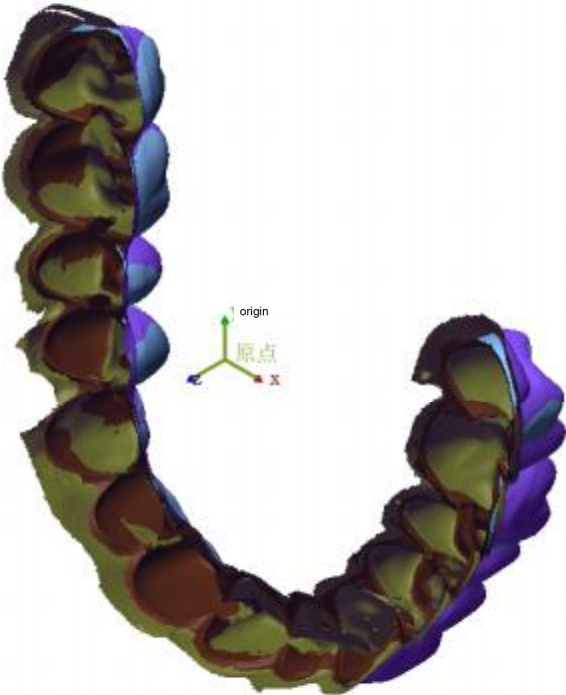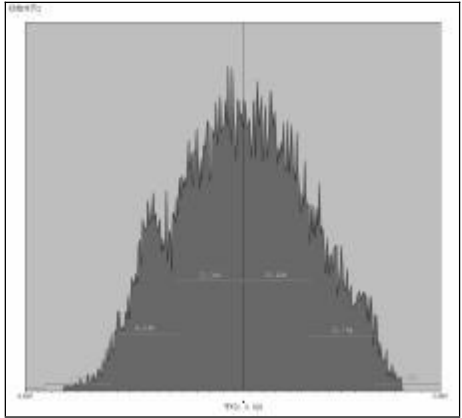

|                    |         |
|--------------------|---------|
| Minimum            | -0.4837 |
| Maximum            | 0.4857  |
| Average            | 0.028   |
| RMS                | 0.1923  |
| Standard deviation | 0.1902  |
| Dispersion         | 0.0362  |
| +Average           | 0.1687  |
| -Average           | -0.1452 |

|              |                |
|--------------|----------------|
| Product Name | [Product Name] |
| Part Name    | [Part Name]    |

|            |              |
|------------|--------------|
| Department | [Department] |
| Inspector  | [Inspector]  |

|      |              |
|------|--------------|
| Date | Jul 25, 2023 |
| Unit | mm           |

# 结果数据 - 1 : 最佳拟合对齐2

Results data-1:Best-fit alignment2

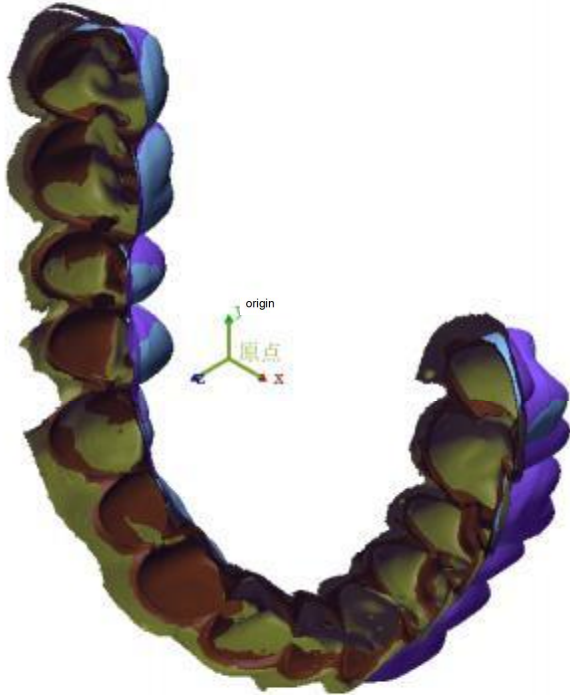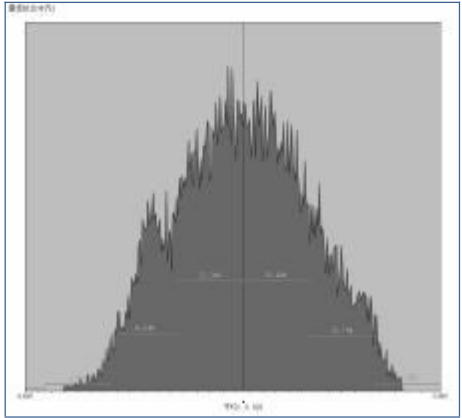

|                    |         |
|--------------------|---------|
| Minimum            | -0.4837 |
| Maximum            | 0.4857  |
| Average            | 0.028   |
| RMS                | 0.1923  |
| Standard deviation | 0.1902  |
| Dispersion         | 0.0362  |
| +Average           | 0.1687  |
| -Average           | -0.1452 |

|              |                |
|--------------|----------------|
| Product Name | [Product Name] |
| Part Name    | [Part Name]    |

|            |              |
|------------|--------------|
| Department | [Department] |
| Inspector  | [Inspector]  |

|      |              |
|------|--------------|
| Date | Jul 25, 2023 |
| Unit | mm           |



# 结果数据 - 1 : 初始对齐3

Results data-1:Initial alignment3

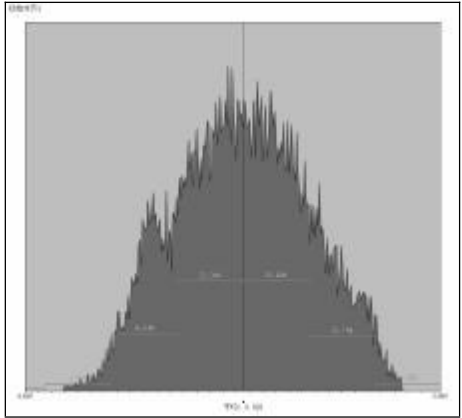

|                    |         |
|--------------------|---------|
| Minimum            | -0.4837 |
| Maximum            | 0.4857  |
| Average            | 0.028   |
| RMS                | 0.1923  |
| Standard deviation | 0.1902  |
| Dispersion         | 0.0362  |
| +Average           | 0.1687  |
| -Average           | -0.1452 |

|              |                |
|--------------|----------------|
| Product Name | [Product Name] |
| Part Name    | [Part Name]    |

|            |              |
|------------|--------------|
| Department | [Department] |
| Inspector  | [Inspector]  |

|      |              |
|------|--------------|
| Date | Jul 25, 2023 |
| Unit | mm           |

# 结果数据 - 1 : 最佳拟合对齐3

Results data-1:Best-fit alignment3

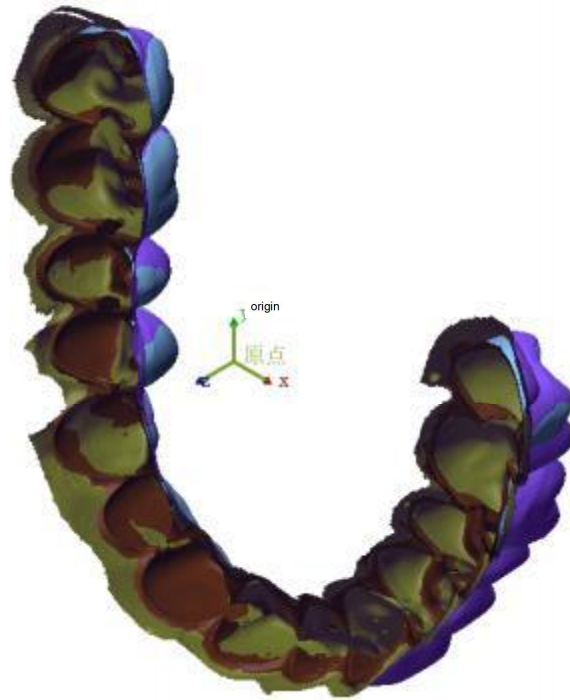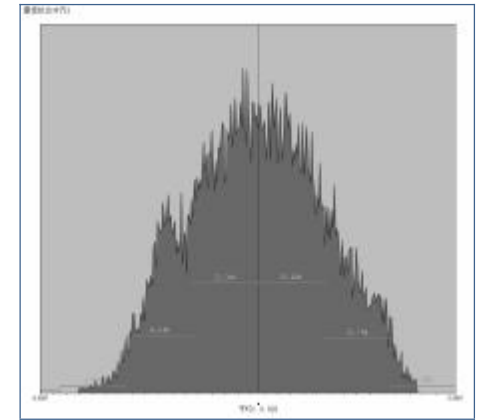

|                    |         |
|--------------------|---------|
| Minimum            | -0.4837 |
| Maximum            | 0.4857  |
| Average            | 0.028   |
| RMS                | 0.1923  |
| Standard deviation | 0.1902  |
| Dispersion         | 0.0362  |
| +Average           | 0.1687  |
| -Average           | -0.1452 |

|              |                |
|--------------|----------------|
| Product Name | [Product Name] |
| Part Name    | [Part Name]    |

|            |              |
|------------|--------------|
| Department | [Department] |
| Inspector  | [Inspector]  |

|      |              |
|------|--------------|
| Date | Jul 25, 2023 |
| Unit | mm           |

# 结果数据 - 1 : 初始对齐4

Results data-1:Initial alignment4

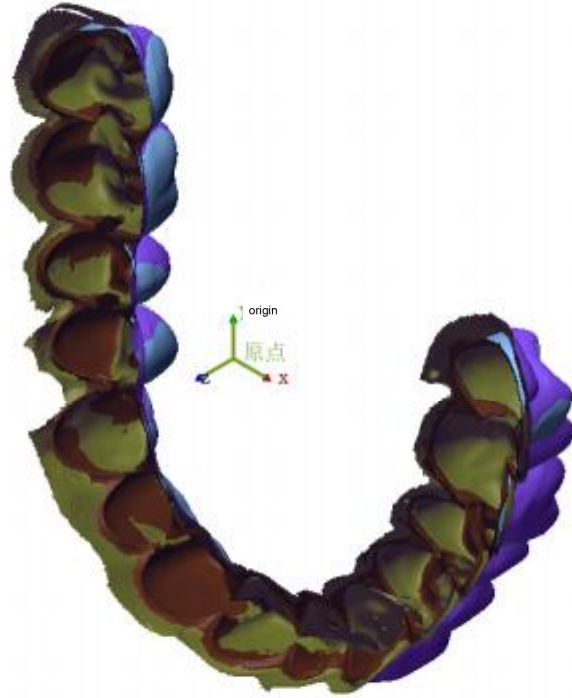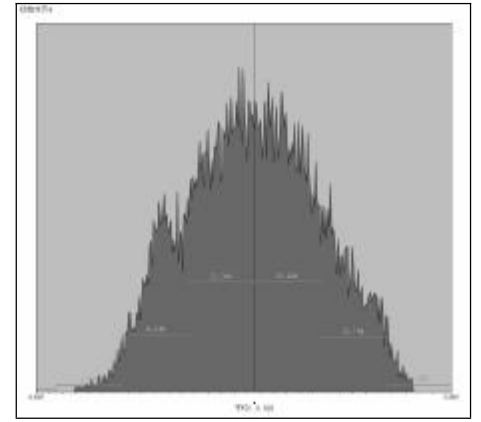

|                    |         |
|--------------------|---------|
| Minimum            | -0.4837 |
| Maximum            | 0.4857  |
| Average            | 0.028   |
| RMS                | 0.1923  |
| Standard deviation | 0.1902  |
| Dispersion         | 0.0362  |
| +Average           | 0.1687  |
| -Average           | -0.1452 |

|              |                |
|--------------|----------------|
| Product Name | [Product Name] |
| Part Name    | [Part Name]    |

|            |              |
|------------|--------------|
| Department | [Department] |
| Inspector  | [Inspector]  |

|      |              |
|------|--------------|
| Date | Jul 25, 2023 |
| Unit | mm           |

# 结果数据 - 1 : 最佳拟合对齐4

Results data-1:Best-fit alignment4

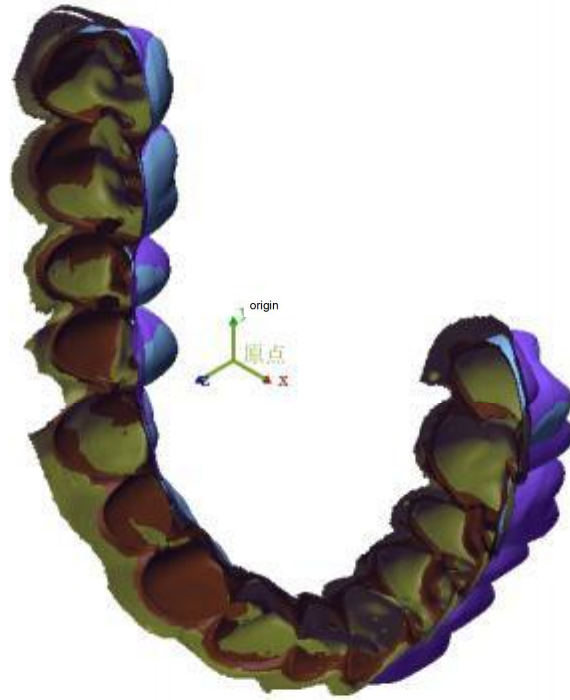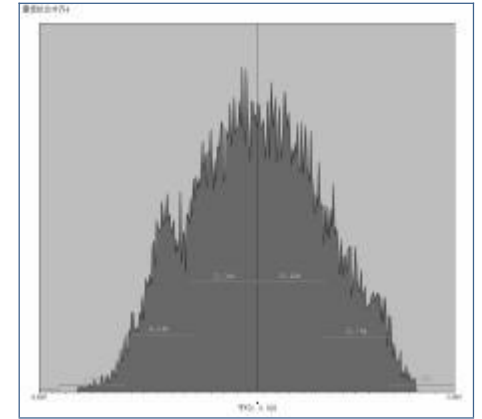

|                    |         |
|--------------------|---------|
| Minimum            | -0.4837 |
| Maximum            | 0.4857  |
| Average            | 0.028   |
| RMS                | 0.1923  |
| Standard deviation | 0.1902  |
| Dispersion         | 0.0362  |
| +Average           | 0.1687  |
| -Average           | -0.1452 |

|              |                |
|--------------|----------------|
| Product Name | [Product Name] |
| Part Name    | [Part Name]    |

|            |              |
|------------|--------------|
| Department | [Department] |
| Inspector  | [Inspector]  |

|      |              |
|------|--------------|
| Date | Jul 25, 2023 |
| Unit | mm           |

# 结果数据 - 1 : 初始对齐5

Results data-1:Initial alignment5

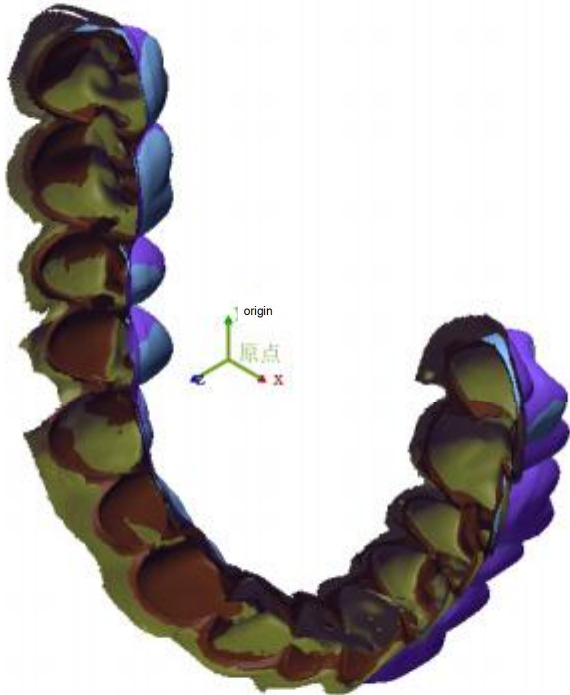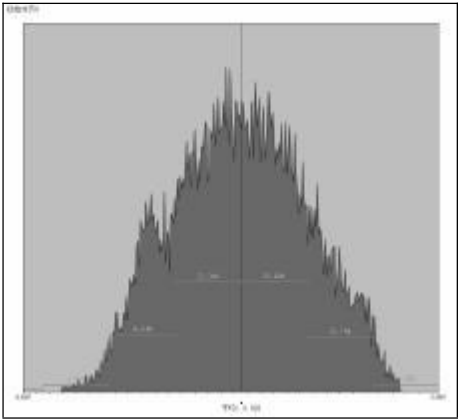

|                    |         |
|--------------------|---------|
| Minimum            | -0.4837 |
| Maximum            | 0.4857  |
| Average            | 0.028   |
| RMS                | 0.1923  |
| Standard deviation | 0.1902  |
| Dispersion         | 0.0362  |
| +Average           | 0.1687  |
| -Average           | -0.1452 |

|              |                |
|--------------|----------------|
| Product Name | [Product Name] |
| Part Name    | [Part Name]    |

|            |              |
|------------|--------------|
| Department | [Department] |
| Inspector  | [Inspector]  |

|      |              |
|------|--------------|
| Date | Jul 25, 2023 |
| Unit | mm           |

# 结果数据 - 1 : 最佳拟合对齐5

Results data-1:Best-fit alignment5

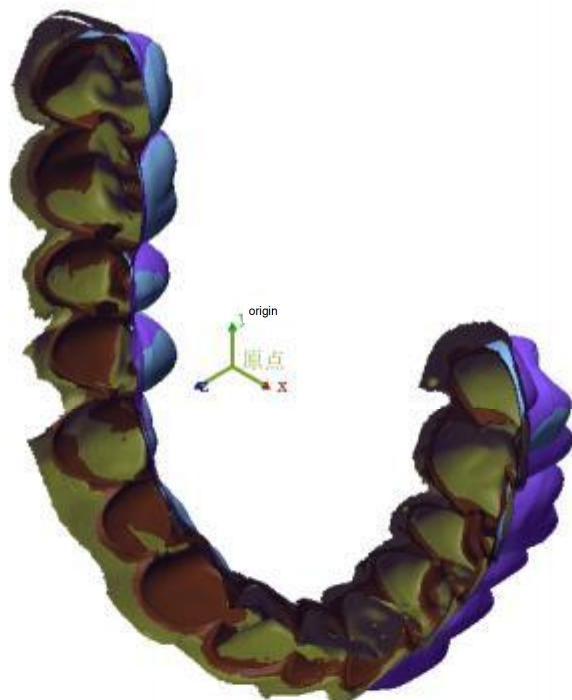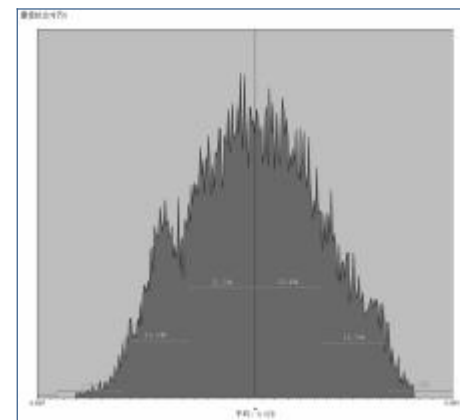

|                    |         |
|--------------------|---------|
| Minimum            | -0.4837 |
| Maximum            | 0.4857  |
| Average            | 0.028   |
| RMS                | 0.1923  |
| Standard deviation | 0.1902  |
| Dispersion         | 0.0362  |
| + Average          | 0.1687  |
| - Average          | -0.1452 |

|              |                |
|--------------|----------------|
| Product Name | [Product Name] |
| Part Name    | [Part Name]    |

|            |              |
|------------|--------------|
| Department | [Department] |
| Inspector  | [Inspector]  |

|      |              |
|------|--------------|
| Date | Jul 25, 2023 |
| Unit | mm           |

# 结果数据 - 1 : 3D 比较氯6

Results data-1:3D compare Effective chlorine spray6

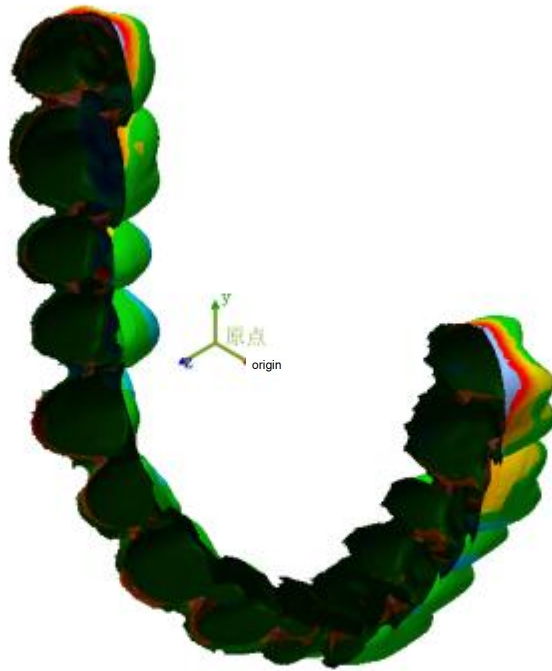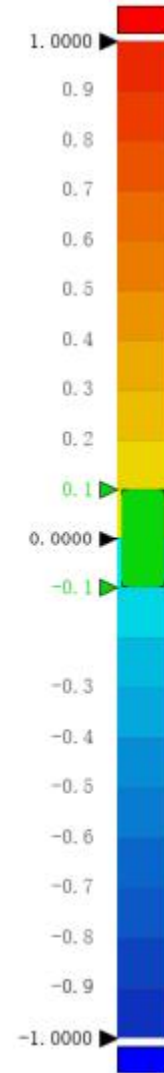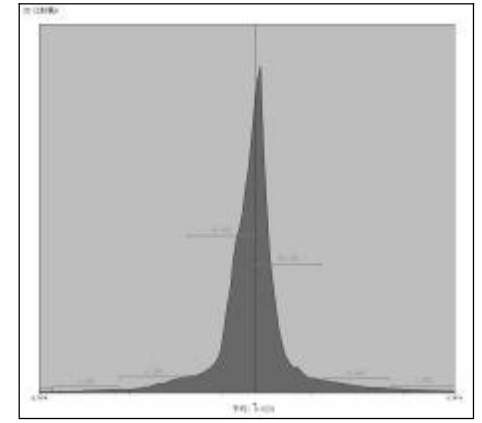

|                     |         |
|---------------------|---------|
| Minimum             | -1.3848 |
| Maximum             | 1.3852  |
| Average             | 0.0231  |
| RMS                 | 0.2425  |
| Standard deviation  | 0.2414  |
| Dispersion          | 0.0583  |
| +Average            | 0.1264  |
| -Average            | -0.1236 |
| Within Tolerance(%) | 72.0998 |
| Out Of Tolerance(%) | 27.9002 |
| Above Tolerance(%)  | 15.5751 |
| Below Tolerance(%)  | 12.3251 |

|              |                |
|--------------|----------------|
| Product Name | [Product Name] |
| Part Name    | [Part Name]    |

|            |              |
|------------|--------------|
| Department | [Department] |
| Inspector  | [Inspector]  |

|      |              |
|------|--------------|
| Date | Jul 25, 2023 |
| Unit | mm           |

| Name                                 | Minimum | Maximum | Average | RMS    | Standard deviation | Dispersion | +Average | -Average |
|--------------------------------------|---------|---------|---------|--------|--------------------|------------|----------|----------|
| 3D compare Effective chlorine spray6 | -1.3848 | 1.3852  | 0.0231  | 0.2425 | 0.2414             | 0.0583     | 0.1264   | -0.1236  |

|              |                |
|--------------|----------------|
| Product Name | [Product Name] |
|--------------|----------------|

|            |              |
|------------|--------------|
| Department | [Department] |
|------------|--------------|

|      |              |
|------|--------------|
| Date | Jul 25, 2023 |
|------|--------------|

|           |             |
|-----------|-------------|
| Inspector | [Inspector] |
|-----------|-------------|

|      |    |
|------|----|
| Unit | mm |
|------|----|



|           |             |
|-----------|-------------|
| Part Name | [Part Name] |
|-----------|-------------|

# 结果数据 - 1 : 3D 比较氯7

Results data-1:3D compare Effective chlorine spray7

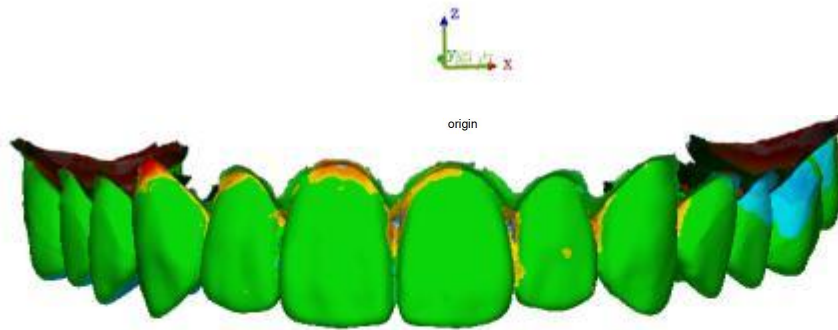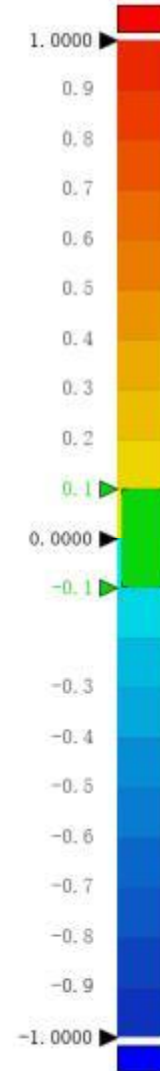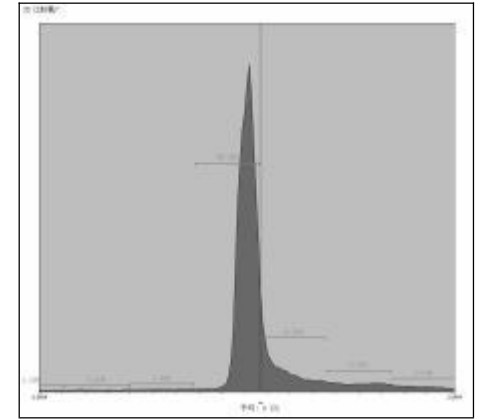

|                      |         |
|----------------------|---------|
| Minimum              | -2.8705 |
| Maximum              | 2.8703  |
| Average              | 0.121   |
| RMS                  | 0.6577  |
| Standard deviation   | 0.6465  |
| Dispersion           | 0.4179  |
| +Average             | 0.3969  |
| -Average             | -0.2467 |
| Within Tolerance.(%) | 56.0773 |
| Out Of Tolerance(%)  | 43.9227 |
| Above Tolerance(%)   | 29.4427 |
| Below Tolerance(%)   | 14.48   |

|              |                |
|--------------|----------------|
| Product Name | [Product Name] |
| Part Name    | [Part Name]    |

|            |              |
|------------|--------------|
| Department | [Department] |
| Inspector  | [Inspector]  |

|      |              |
|------|--------------|
| Date | Jul 25, 2023 |
| Unit | mm           |

| Name                                 | Minimum | Maximum | Average | RMS    | Standard deviation | Dispersion | +Average | -Average |
|--------------------------------------|---------|---------|---------|--------|--------------------|------------|----------|----------|
| 3D compare Effective chlorine spray7 | -2.8705 | 2.8703  | 0.121   | 0.6577 | 0.6465             | 0.4179     | 0.3969   | -0.2467  |

|              |                |
|--------------|----------------|
| Product Name | [Product Name] |
|--------------|----------------|

|            |              |
|------------|--------------|
| Department | [Department] |
|------------|--------------|

|      |              |
|------|--------------|
| Date | Jul 25, 2023 |
|------|--------------|

|           |             |
|-----------|-------------|
| Inspector | [Inspector] |
|-----------|-------------|

|      |    |
|------|----|
| Unit | mm |
|------|----|

|           |             |
|-----------|-------------|
| Part Name | [Part Name] |
|-----------|-------------|

# 结果数据 - 1 : 3D 比较氯8

Results data-1:3D compare Effective chlorine spray8

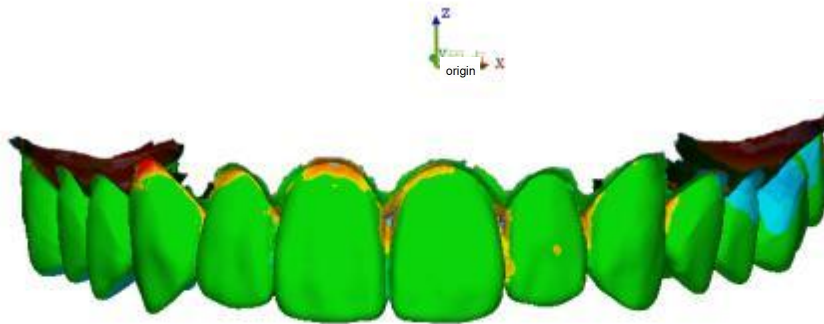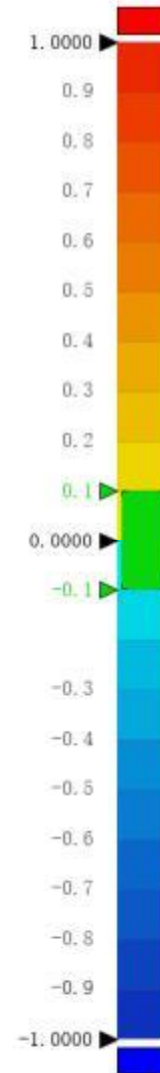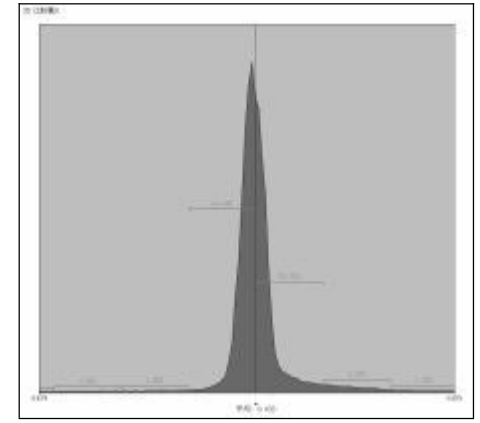

|                     |         |
|---------------------|---------|
| Minimum             | -1.9033 |
| Maximum             | 1.904   |
| Average             | 0.033   |
| RMS                 | 0.3034  |
| Standard deviation  | 0.3016  |
| Dispersion          | 0.091   |
| +Average            | 0.1366  |
| -Average            | -0.1293 |
| Within Tolerance(%) | 78.657  |
| Out Of Tolerance(%) | 21.343  |
| Above Tolerance(%)  | 14.5378 |
| Below Tolerance(%)  | 6.8052  |

|              |                |
|--------------|----------------|
| Product Name | [Product Name] |
| Part Name    | [Part Name]    |

|            |              |
|------------|--------------|
| Department | [Department] |
| Inspector  | [Inspector]  |

|      |              |
|------|--------------|
| Date | Jul 25, 2023 |
| Unit | mm           |

| Name                                 | Minimum | Maximum | Average | RMS    | Standard deviation | Dispersion | +Average | -Average |
|--------------------------------------|---------|---------|---------|--------|--------------------|------------|----------|----------|
| 3D compare Effective chlorine spray8 | -1.9033 | 1.904   | 0.033   | 0.3034 | 0.3016             | 0.091      | 0.1366   | -0.1293  |

|              |                |
|--------------|----------------|
| Product Name | [Product Name] |
| Part Name    | [Part Name]    |

|            |              |
|------------|--------------|
| Department | [Department] |
| Inspector  | [Inspector]  |

|      |              |
|------|--------------|
| Date | Jul 25, 2023 |
| Unit | mm           |

# 结果数据 - 1 : 3D 比较氯9

Results data-1:3D compare Effective chlorine spray9

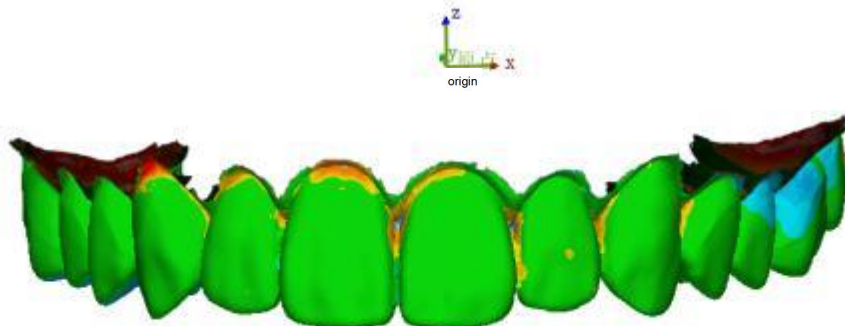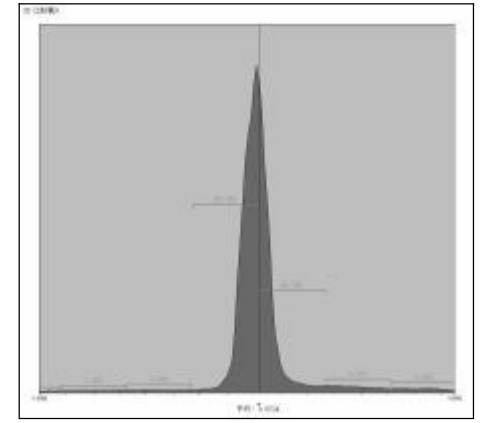

|                      |         |
|----------------------|---------|
| Minimum              | -1.7282 |
| Maximum              | 1.7282  |
| Average              | 0.0534  |
| RMS                  | 0.3386  |
| Standard deviation   | 0.3344  |
| Dispersion           | 0.1118  |
| +Average             | 0.1591  |
| -Average             | -0.1662 |
| Within Tolerance.(%) | 73.4786 |
| Out Of Tolerance(%)  | 26.5214 |
| Above Tolerance(%)   | 19.3198 |
| Below Tolerance(%)   | 7.2016  |

|              |                |
|--------------|----------------|
| Product Name | [Product Name] |
| Part Name    | [Part Name]    |

|            |              |
|------------|--------------|
| Department | [Department] |
| Inspector  | [Inspector]  |

|      |              |
|------|--------------|
| Date | Jul 25, 2023 |
| Unit | mm           |

| Name                                 | Minimum | Maximum | Average | RMS    | Standard deviation | Dispersion | +Average | -Average |
|--------------------------------------|---------|---------|---------|--------|--------------------|------------|----------|----------|
| 3D compare Effective chlorine spray9 | -1.7282 | 1.7282  | 0.0534  | 0.3386 | 0.3344             | 0.1118     | 0.1591   | -0.1662  |

|              |                |
|--------------|----------------|
| Product Name | [Product Name] |
| Part Name    | [Part Name]    |

|            |              |
|------------|--------------|
| Department | [Department] |
| Inspector  | [Inspector]  |

|      |              |
|------|--------------|
| Date | Jul 25, 2023 |
| Unit | mm           |



# 结果数据 - 1 : 3D 比较氯10

Results data-1:3D compare Effective chlorine spray10

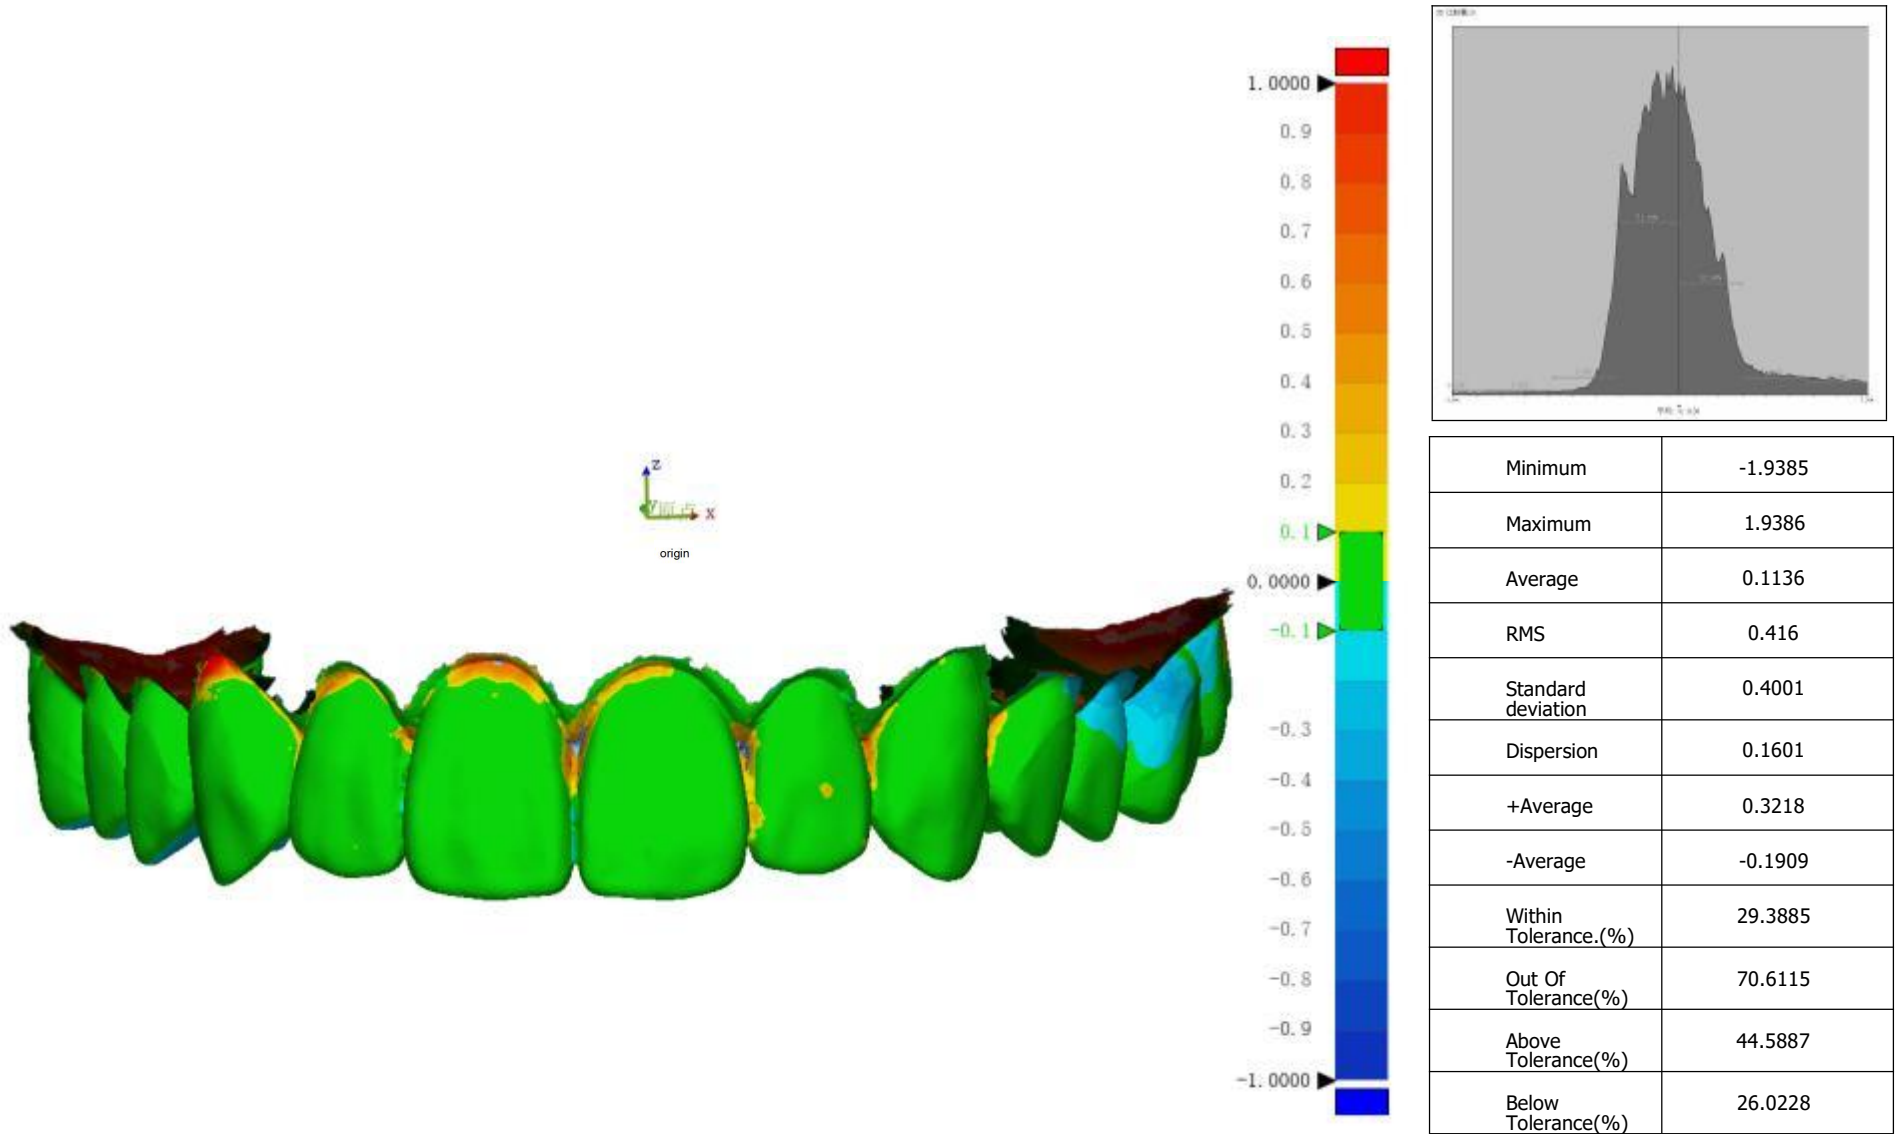

|              |                |
|--------------|----------------|
| Product Name | [Product Name] |
| Part Name    | [Part Name]    |

|            |              |
|------------|--------------|
| Department | [Department] |
| Inspector  | [Inspector]  |

|      |              |
|------|--------------|
| Date | Jul 25, 2023 |
| Unit | mm           |

| Name                                  | Minimum | Maximum | Average | RMS   | Standard deviation | Dispersion | +Average | -Average |
|---------------------------------------|---------|---------|---------|-------|--------------------|------------|----------|----------|
| 3D compare Effective chlorine spray10 | -1.9385 | 1.9386  | 0.1136  | 0.416 | 0.4001             | 0.1601     | 0.3218   | -0.1909  |

|              |                |
|--------------|----------------|
| Product Name | [Product Name] |
| Part Name    | [Part Name]    |

|            |              |
|------------|--------------|
| Department | [Department] |
| Inspector  | [Inspector]  |

|      |              |
|------|--------------|
| Date | Jul 25, 2023 |
| Unit | mm           |

# 结果数据 - 1 : 参考数据 - 初始

Results data-1:Reference data-Initial

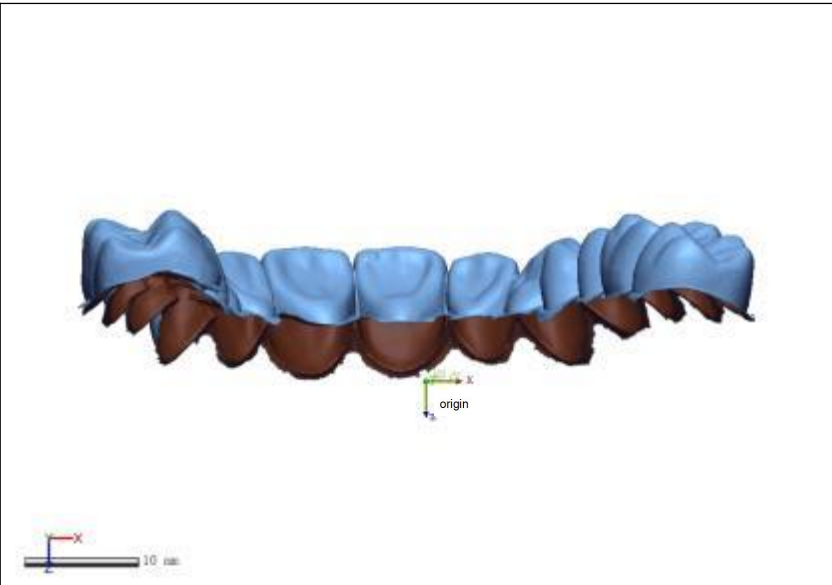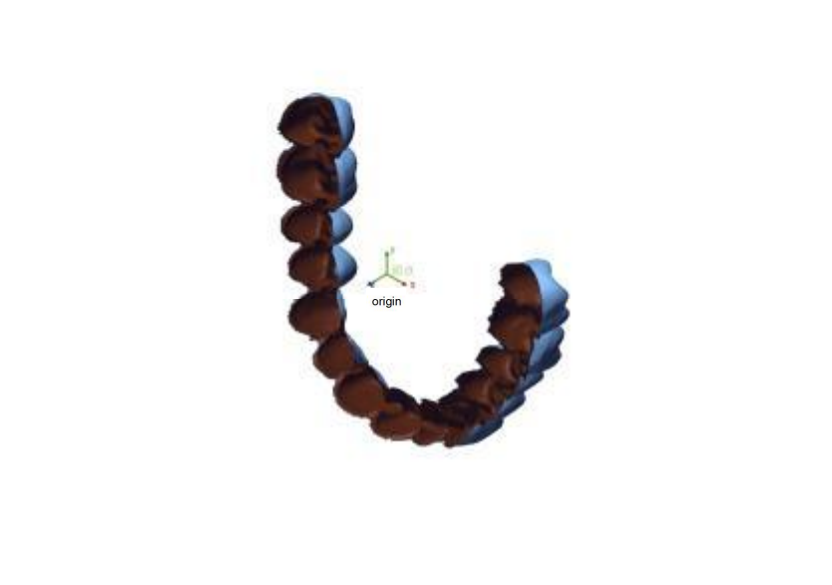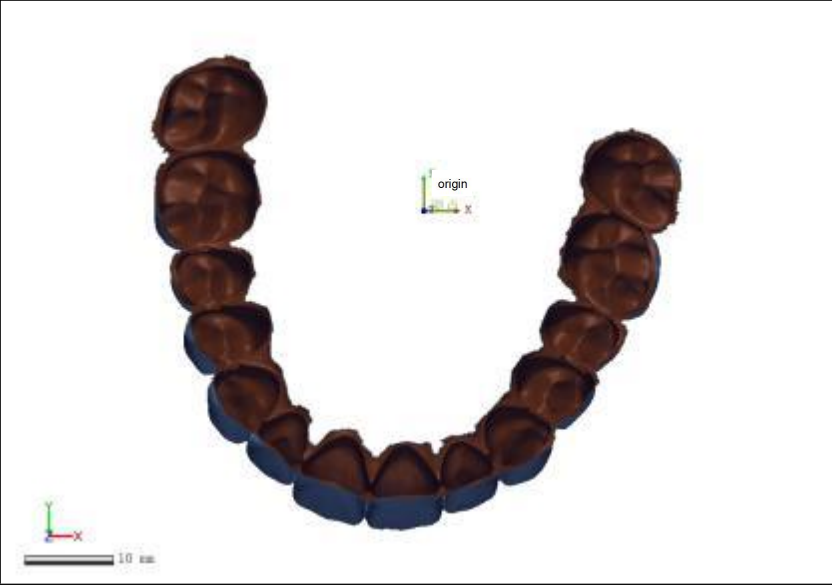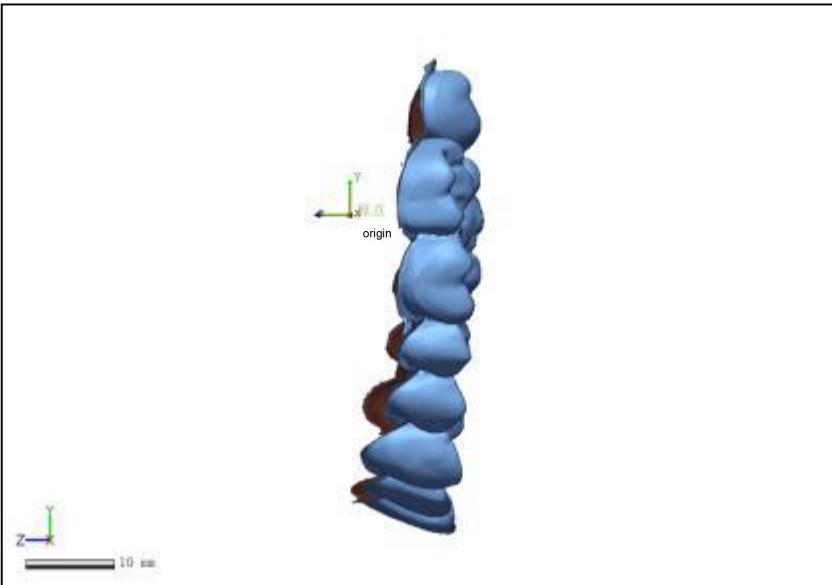

|              |                |
|--------------|----------------|
| Product Name | [Product Name] |
| Part Name    | [Part Name]    |

|            |              |
|------------|--------------|
| Department | [Department] |
| Inspector  | [Inspector]  |

|      |              |
|------|--------------|
| Date | Jul 26, 2023 |
| Unit | mm           |

# 结果数据 - 1 : 测试数据 - 氯12

Results data-1:Test data- Effective Chlorine12

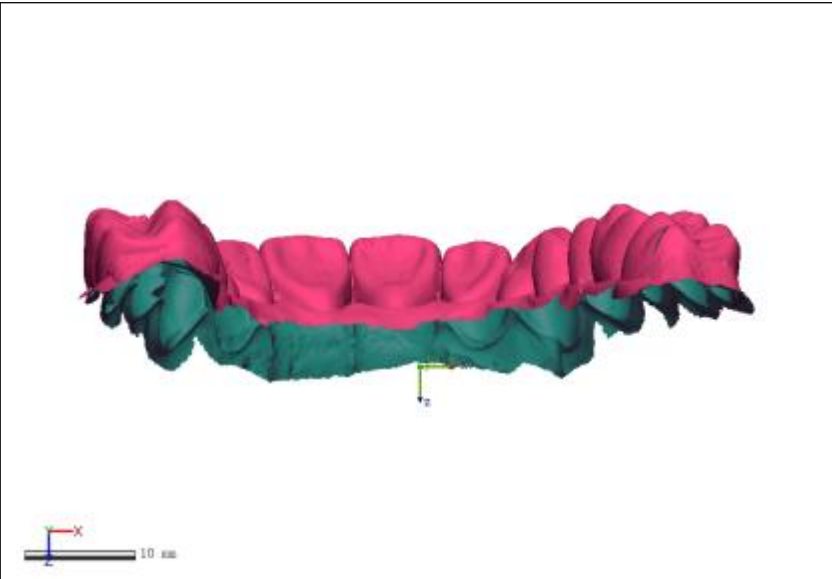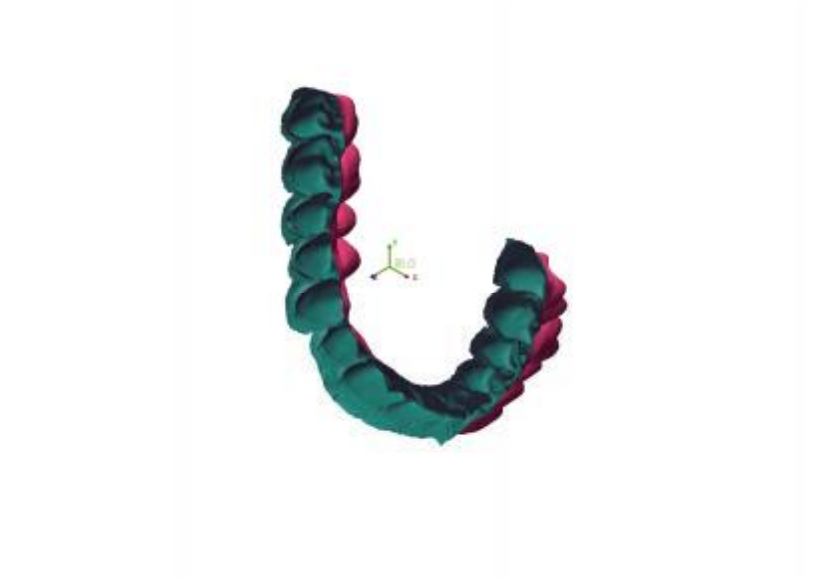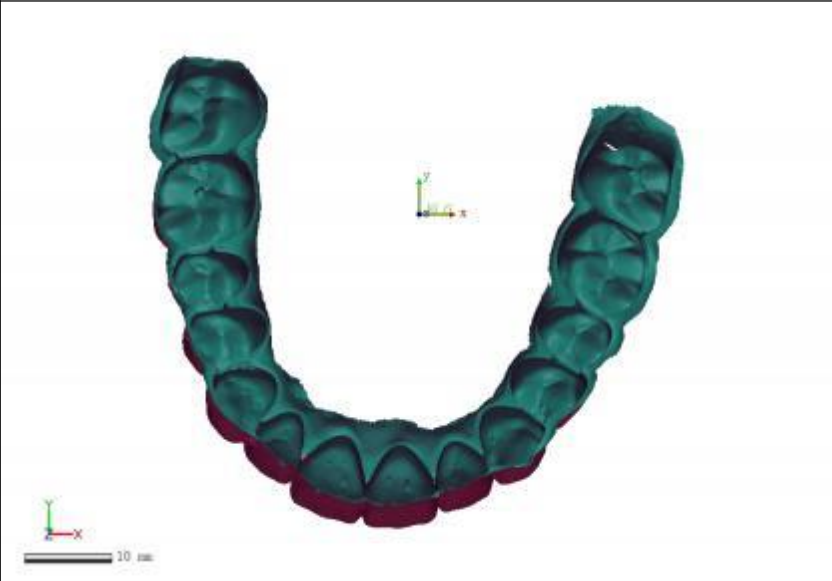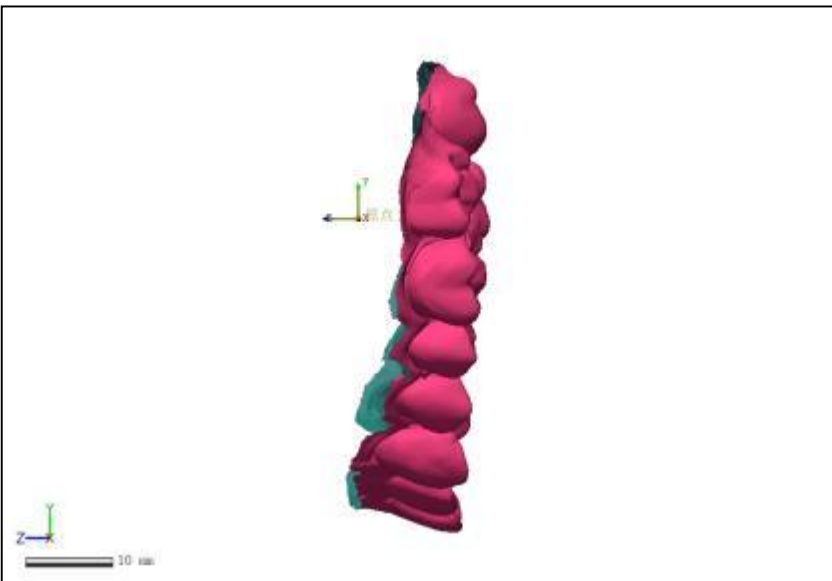

|              |                |
|--------------|----------------|
| Product Name | [Product Name] |
| Part Name    | [Part Name]    |

|            |              |
|------------|--------------|
| Department | [Department] |
| Inspector  | [Inspector]  |

|      |              |
|------|--------------|
| Date | Jul 26, 2023 |
| Unit | mm           |

# 结果数据 - 1 : 初始对齐1

Results data-1:Initial alignment1

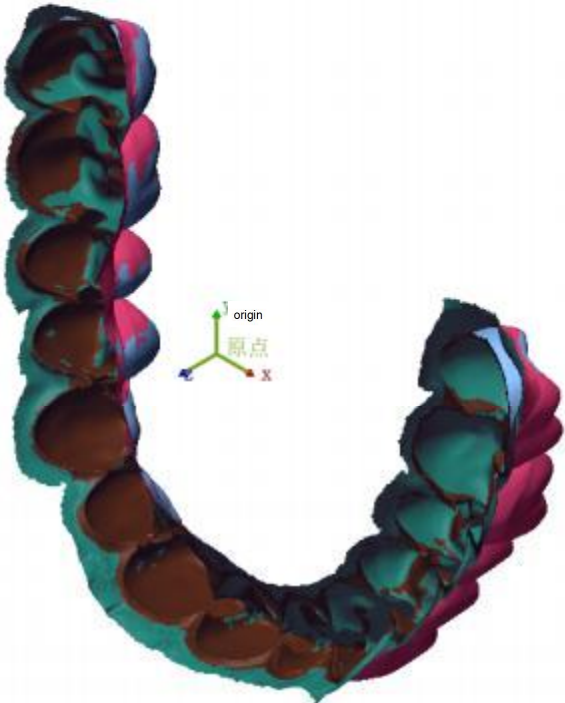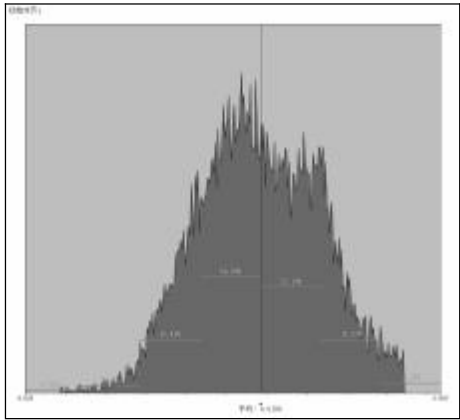

|                    |         |
|--------------------|---------|
| Minimum            | -0.1253 |
| Maximum            | 0.1255  |
| Average            | 0.0199  |
| RMS                | 0.0485  |
| Standard deviation | 0.0442  |
| Dispersion         | 0.002   |
| +Average           | 0.045   |
| -Average           | -0.028  |

|              |                |
|--------------|----------------|
| Product Name | [Product Name] |
| Part Name    | [Part Name]    |

|            |              |
|------------|--------------|
| Department | [Department] |
| Inspector  | [Inspector]  |

|      |              |
|------|--------------|
| Date | Jul 26, 2023 |
| Unit | mm           |

# 结果数据 - 1 : 最佳拟合对齐1

Results data-1:Best-fit alignment1

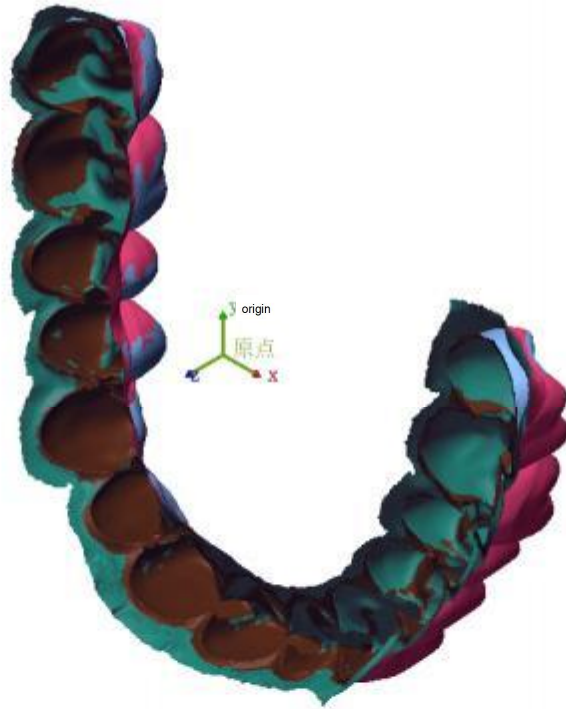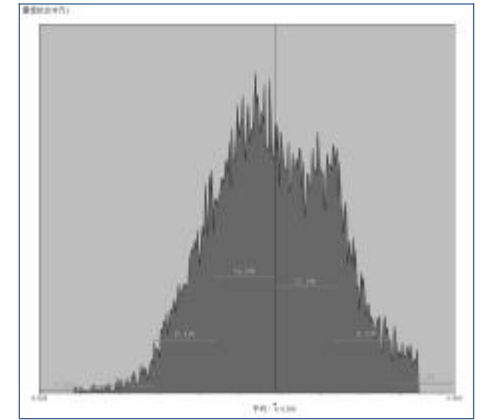

|                    |         |
|--------------------|---------|
| Minimum            | -0.1253 |
| Maximum            | 0.1255  |
| Average            | 0.0199  |
| RMS                | 0.0485  |
| Standard deviation | 0.0442  |
| Dispersion         | 0.002   |
| +Average           | 0.045   |
| -Average           | -0.028  |

|              |                |
|--------------|----------------|
| Product Name | [Product Name] |
| Part Name    | [Part Name]    |

|            |              |
|------------|--------------|
| Department | [Department] |
| Inspector  | [Inspector]  |

|      |              |
|------|--------------|
| Date | Jul 26, 2023 |
| Unit | mm           |

# 结果数据 - 1 : 初始对齐2

Results data-1:Initial alignment2

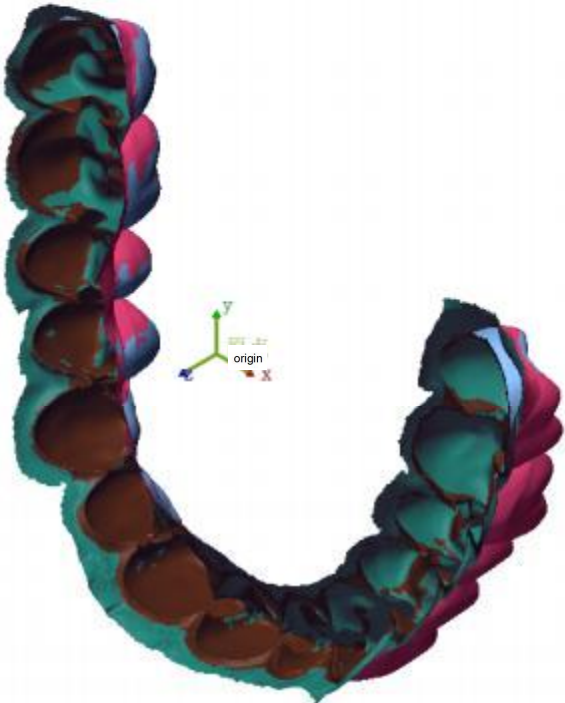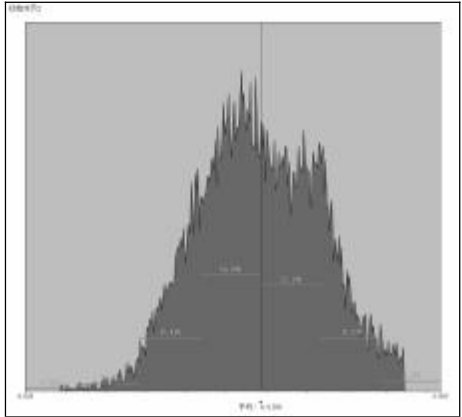

|                    |         |
|--------------------|---------|
| Minimum            | -0.1253 |
| Maximum            | 0.1255  |
| Average            | 0.0199  |
| RMS                | 0.0485  |
| Standard deviation | 0.0442  |
| Dispersion         | 0.002   |
| +Average           | 0.045   |
| -Average           | -0.028  |

|              |                |
|--------------|----------------|
| Product Name | [Product Name] |
| Part Name    | [Part Name]    |

|            |              |
|------------|--------------|
| Department | [Department] |
| Inspector  | [Inspector]  |

|      |              |
|------|--------------|
| Date | Jul 26, 2023 |
|------|--------------|

|      |    |
|------|----|
| Unit | mm |
|------|----|



# 结果数据 - 1 : 最佳拟合对齐

Results data-1:Best-fit alignment2

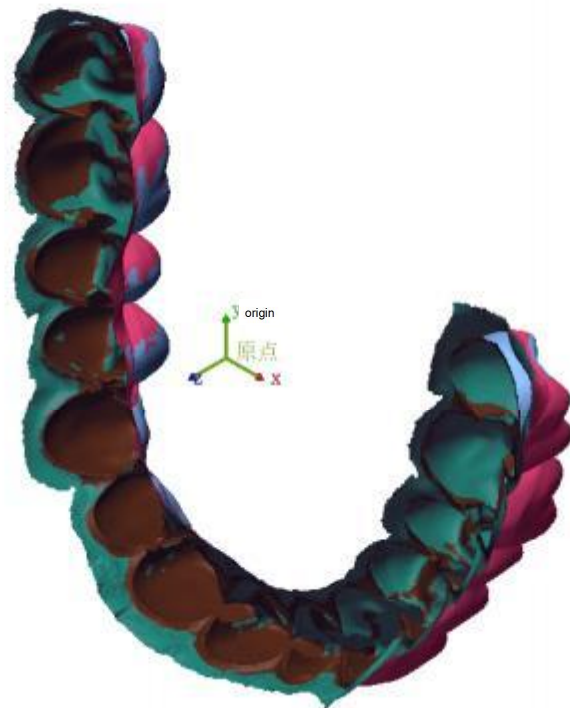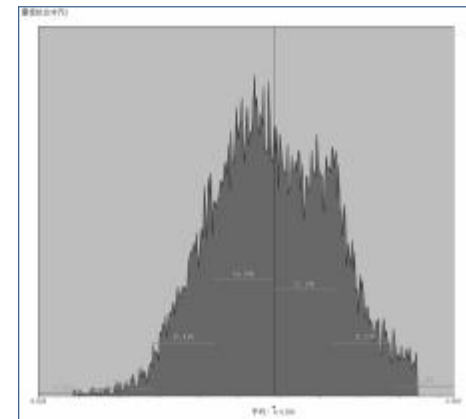

|                    |         |
|--------------------|---------|
| Minimum            | -0.1253 |
| Maximum            | 0.1255  |
| Average            | 0.0199  |
| RMS                | 0.0485  |
| Standard deviation | 0.0442  |
| Dispersion         | 0.002   |
| +Average           | 0.045   |
| -Average           | -0.028  |

|              |                |
|--------------|----------------|
| Product Name | [Product Name] |
| Part Name    | [Part Name]    |

|            |              |
|------------|--------------|
| Department | [Department] |
| Inspector  | [Inspector]  |

|      |              |
|------|--------------|
| Date | Jul 26, 2023 |
| Unit | mm           |

# 结果数据 - 1 : 3D 比较氯11

Results data-1:3D compare Effective chlorine spray11

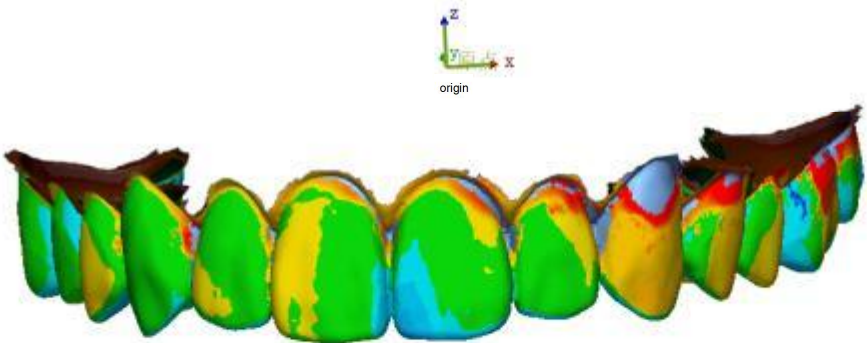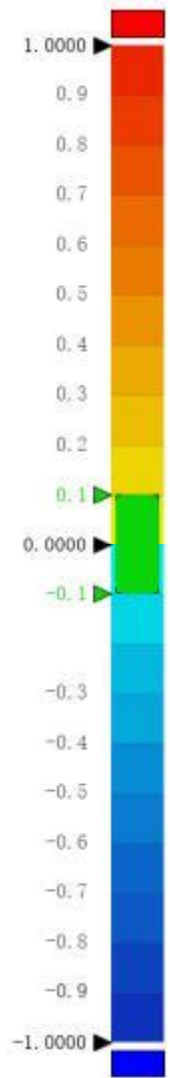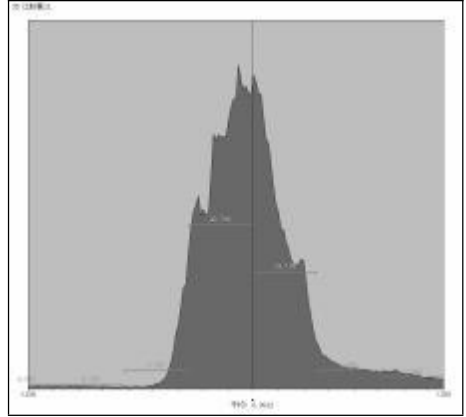

|                     |         |
|---------------------|---------|
| Minimum             | -1.8804 |
| Maximum             | 1.8805  |
| Average             | 0.0912  |
| RMS                 | 0.3901  |
| Standard deviation  | 0.3793  |
| Dispersion          | 0.1439  |
| +Average            | 0.291   |
| -Average            | -0.1997 |
| Within Tolerance(%) | 30.8763 |
| Out Of Tolerance(%) | 69.1237 |
| Above Tolerance(%)  | 42.8995 |
| Below Tolerance(%)  | 26.2242 |

|              |                |
|--------------|----------------|
| Product Name | [Product Name] |
| Part Name    | [Part Name]    |

|            |              |
|------------|--------------|
| Department | [Department] |
| Inspector  | [Inspector]  |

|      |              |
|------|--------------|
| Date | Jul 26, 2023 |
|------|--------------|

|      |    |
|------|----|
| Unit | mm |
|------|----|

| Name                                  | Minimum | Maximum | Average | RMS    | Standard deviation | Dispersion | +Average | -Average |
|---------------------------------------|---------|---------|---------|--------|--------------------|------------|----------|----------|
| 3D compare Effective chlorine spray11 | -1.8804 | 1.8805  | 0.0912  | 0.3901 | 0.3793             | 0.1439     | 0.291    | -0.1997  |

|              |                |
|--------------|----------------|
| Product Name | [Product Name] |
| Part Name    | [Part Name]    |

|            |              |
|------------|--------------|
| Department | [Department] |
| Inspector  | [Inspector]  |

|      |              |
|------|--------------|
| Date | Jul 26, 2023 |
| Unit | mm           |

# 结果数据 - 1 : 3D 比较氯12

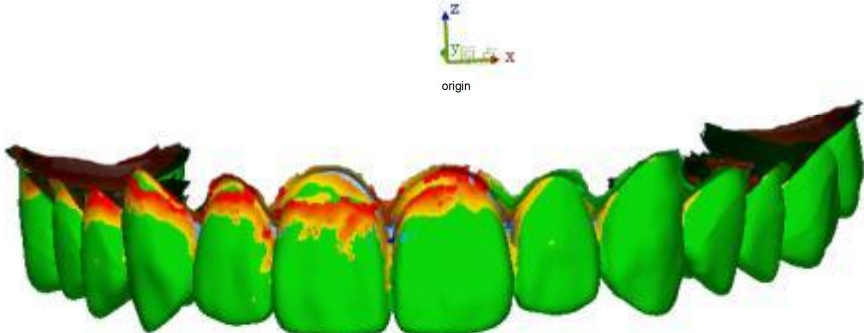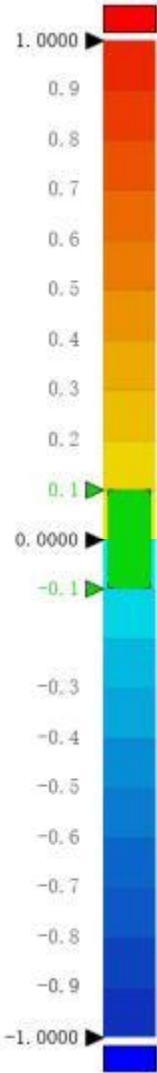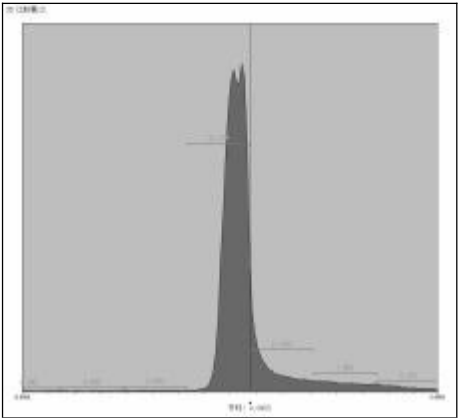

|                     |         |
|---------------------|---------|
| Minimum             | -1.5698 |
| Maximum             | 1.5705  |
| Average             | 0.0903  |
| RMS                 | 0.3122  |
| Standard deviation  | 0.2989  |
| Dispersion          | 0.0893  |
| +Average            | 0.1779  |
| -Average            | -0.092  |
| Within Tolerance(%) | 75.8311 |
| Out Of Tolerance(%) | 24.1689 |
| Above Tolerance(%)  | 20.8004 |
| Below Tolerance(%)  | 3.3684  |

|              |                |
|--------------|----------------|
| Product Name | [Product Name] |
| Part Name    | [Part Name]    |

|            |              |
|------------|--------------|
| Department | [Department] |
| Inspector  | [Inspector]  |

|      |              |
|------|--------------|
| Date | Jul 26, 2023 |
| Unit | mm           |

| Name                                  | Minimum | Maximum | Average | RMS    | Standard deviation | Dispersion | +Average | -Average |
|---------------------------------------|---------|---------|---------|--------|--------------------|------------|----------|----------|
| 3D compare Effective chlorine spray12 | -1.5698 | 1.5705  | 0.0903  | 0.3122 | 0.2989             | 0.0893     | 0.1779   | -0.092   |

|              |                |
|--------------|----------------|
| Product Name | [Product Name] |
| Part Name    | [Part Name]    |

|            |              |
|------------|--------------|
| Department | [Department] |
| Inspector  | [Inspector]  |

|      |              |
|------|--------------|
| Date | Jul 26, 2023 |
| Unit | mm           |
