# Supplementary material for: Study on the effect of chlorogenic acid on the antimicrobial effect, physical properties and model accuracy of alginate impression materials
Source: PeerJ journal article supplement (doi:10.7717/peerj.18228), 2024-10-31
Supplement: Experimental_colony_count.xlsx [file Experimental_colony_count.xlsx]

## Sheet: Staphylococcus aureus
TIME	Mix only (10mg/mL CA)
0	540
10	1560	1650	990	1190	1050
20	580	390	870	910	960
30	580	350	460	590	450
	Spray only (60mg/mL CA)
0	840
10	270	460	420	320	150
20	160	150	140	120	110
30	60	50	30	40	40
	Mix (10mg/mL CA) and spray(50mg/mL CA)
0	630
10	120	160	50	160	170
20	30	0	0	40	30
30	0	0	0	0	10
	Mix (10mg/mL CA) and spray(55mg/mL CA)
0	430
10	20	30	90	90	90
20	10	10	0	30	10
30	0	0	0	0	0
	Mix (10mg/mL CA) and spray(60mg/mL CA)
0	550
10	30	20	20	60	50
20	0	0	0	0	10
30	0	0	0	0	0

## Sheet: Candida albicans
TIME	Mix only (10mg/mL CA)
0	700
10	1590	1350	1210	1200	1240
20	1180	1230	750	870	760
30	340	680	360	410	350
	Spray only (60mg/mL CA)
0	800
10	340	310	150	210	210
20	80	60	40	60	120
30	50	40	30	30	50
	Mix (10mg/mL CA) and spray(50mg/mL CA)
0	710
10	120	120	160	120	80
20	0	30	20	20	30
30	0	0	0	0	10
	Mix (10mg/mL CA) and spray(55mg/mL CA)
0	660
10	20	80	110	130	80
20	10	10	0	30	0
30	0	0	0	0	0
	Mix (10mg/mL CA) and spray(60mg/mL CA)
0	740
10	130	80	110	160	100
20	70	0	0	10	0
30	0	0	0	0	0

## Sheet: Escherichia coli
TIME	Mix only (10mg/mL CA)
0	650
10	1450	950	890	1340	1000
20	790	900	1160	410	910
30	310	690	470	320	520
	Spray only (60mg/mL CA)
0	690
10	210	170	170	150	210
20	80	80	60	50	90
30	40	30	50	20	40
	Mix (10mg/mL CA) and spray(50mg/mL CA)
0	620
10	10	20	30	50	30
20	20	20	10	10	0
30	0	0	0	0	0
	Mix (10mg/mL CA) and spray(55mg/mL CA)
0	610
10	10	10	20	10	10
20	10	10	10	0	0
30	0	0	0	0	0
	Mix (10mg/mL CA) and spray(60mg/mL CA)
0	600
10	10	20	20	10	10
20	10	0	20	0	0
30	0	0	0	0	0

## Sheet: Streptococcus pneumoniae
TIME	Mix only (10mg/mL CA)
0	270
10	290	210	110	90	120
20	190	150	80	50	100
30	40	90	60	20	40
	Spray only (60mg/mL CA)
0	300
10	40	50	60	40	60
20	20	10	40	30	40
30	20	0	20	10	20
	Mix (10mg/mL CA) and spray(55mg/mL CA)
0	220
10	20	20	20	10	30
20	0	0	10	0	10
30	0	0	0	0	0
	Mix (10mg/mL CA) and spray(55mg/mL CA)
0	250
10	20	10	20	10	10
20	0	0	0	0	0
30	0	0	0	0	0
	Mix (10mg/mL CA) and spray(60mg/mL CA)
0	210
10	10	30	10	0	0
20	0	0	0	0	0
30	0	0	0	0	0
