# Supplementary material for: Study on the effect of chlorogenic acid on the antimicrobial effect, physical properties and model accuracy of alginate impression materials
Source: PeerJ journal article supplement (doi:10.7717/peerj.18228), 2024-10-31
Supplement: percentage.xlsx [file percentage.xlsx]

## Sheet: Staphylococcus aureus
TIME	Mix only (10mg/mL CA)
10	0.0877193	0.0350877	0.421053	0.304094	0.385965
20	0.660819	0.77193	0.491228	0.467836	0.438596
30	0.660819	0.795322	0.730994	0.654971	0.736842
	Spray only (60mg/mL CA)
10	0.964	0.938667	0.944	0.957333	0.98
20	0.978667	0.98	0.981333	0.984	0.985333
30	0.992	0.993333	0.996	0.994667	0.994667
	Mix (10mg/mL CA) and spray(50mg/mL CA)
10	0.929825	0.906433	0.97076	0.906433	0.900585
20	0.982456	1	1	0.976608	0.982456
30	1	1	1	1	0.994152
	Mix (10mg/mL CA) and spray(55mg/mL CA)
10	0.988304	0.982456	0.947368	0.947368	0.947368
20	0.994152	0.994152	1	0.982456	0.994152
30	1	1	1	1	1
	Mix (10mg/mL CA) and spray(60mg/mL CA)
10	0.982456	0.988304	0.988304	0.964912	0.97076
20	1	1	1	1	0.994152
30	1	1	1	1	1

## Sheet: Candida albicans
TIME	Mix only (10mg/mL CA)
10	0.0124224	0.161491	0.248447	0.254658	0.229814
20	0.267081	0.236025	0.534161	0.459627	0.52795
30	0.78882	0.57764	0.776398	0.745342	0.782609
	Spray only (60mg/mL CA)
10	0.840376	0.85446	0.929577	0.901408	0.901408
20	0.962441	0.971831	0.981221	0.971831	0.943662
30	0.976526	0.981221	0.985915	0.985915	0.976526
	Mix (10mg/mL CA) and spray(50mg/mL CA)
10	0.925466	0.925466	0.900621	0.925466	0.950311
20	1	0.981366	0.987578	0.987578	0.981366
30	1	1	1	1	0.993789
	Mix (10mg/mL CA) and spray(55mg/mL CA)
10	0.987578	0.950311	0.931677	0.919255	0.950311
20	0.993789	0.993789	1	0.981366	1
30	1	1	1	1	1
	Mix (10mg/mL CA) and spray(60mg/mL CA)
10	0.919255	0.950311	0.931677	0.900621	0.937888
20	0.956522	1	1	0.993789	1
30	1	1	1	1	1

## Sheet: Escherichia coli
TIME	Mix only (10mg/mL CA)
10	0.194444	0.472222	0.505556	0.255556	0.444444
20	0.561111	0.5	0.355556	0.772222	0.494444
30	0.827778	0.616667	0.738889	0.822222	0.711111
	Spray only (60mg/mL CA)
10	0.919847	0.935115	0.935115	0.942748	0.919847
20	0.969466	0.969466	0.977099	0.980916	0.965649
30	0.984733	0.98855	0.980916	0.992366	0.984733
	Mix (10mg/mL CA) and spray(50mg/mL CA)
10	0.994444	0.988889	0.983333	0.972222	0.983333
20	0.988889	0.988889	0.994444	0.994444	1
30	1	1	1	1	1
	Mix (10mg/mL CA) and spray(55mg/mL CA)
10	0.994444	0.994444	0.988889	0.994444	0.994444
20	0.994444	0.994444	0.994444	1	1
30	1	1	1	1	1
	Mix (10mg/mL CA) and spray(60mg/mL CA)
10	0.994444	0.988889	0.988889	0.994444	0.994444
20	0.994444	1	0.988889	1	1
30	1	1	1	1	1

## Sheet: Streptococcus pneumoniae
TIME	Mix only (10mg/mL CA)
10	0.171429	0.4	0.685714	0.742857	0.657143
20	0.457143	0.571429	0.771429	0.857143	0.714286
30	0.885714	0.742857	0.828571	0.942857	0.885714
	Spray only (60mg/mL CA)
10	0.929825	0.912281	0.894737	0.929825	0.894737
20	0.964912	0.982456	0.929825	0.947368	0.929825
30	0.964912	1	0.964912	0.982456	0.964912
	Mix (10mg/mL CA) and spray(55mg/mL CA)
10	0.942857	0.942857	0.942857	0.971429	0.914286
20	1	1	0.971429	1	0.971429
30	1	1	1	1	1
	Mix (10mg/mL CA) and spray(55mg/mL CA)
10	0.942857	0.971429	0.942857	0.971429	0.971429
20	1	1	1	1	1
30	1	1	1	1	1
	Mix (10mg/mL CA) and spray(60mg/mL CA)
10	0.971429	0.914286	0.971429	1	1
20	1	1	1	1	1
30	1	1	1	1	1
