# Supplementary material for: Study on the effect of chlorogenic acid on the antimicrobial effect, physical properties and model accuracy of alginate impression materials
Source: PeerJ journal article supplement (doi:10.7717/peerj.18228), 2024-10-31
Supplement: Physical_properties_of_alginate_impression_material_mixed_with_chlorogenic_acid.xlsx [file Physical_properties_of_alginate_impression_material_mixed_with_chlorogenic_acid.xlsx]

## Sheet: Elastic recovery(%)
		Concentration of chlorogenic acid(mg/L)				h1=20mm h0=20mm
		10	15	20
the sample height (mm)	h2-1	19.73	19.68	19.99
	h2-2	19.72	19.71	19.98
	h2-3	19.76	19.67	19.98
	h2-4	19.83	19.64	19.97
	h2-5	19.72	19.66	19.94
Elastic recovery(%)	K1	98.65	98.4	99.95
	K2	98.6	98.55	99.9
	K3	98.8	98.35	99.9
	K4	99.15	98.2	99.85
	K5	98.6	98.3	99.7

## Sheet: Strain-in-compression(%)
		Concentration of chlorogenic acid(mg/L)				h0=20mm
		10	15	20
the sample height (mm)	h1-1	18.42	18.88	18.99
	h1-2	18.53	18.81	19.04
	h1-3	18.36	18.77	19.12
	h1-4	18.23	18.84	18.97
	h1-5	18.22	18.76	18.93
the sample height (mm)	h2-1	15.81	15.95	16.03
	h2-2	16	16.06	16.28
	h2-3	15.83	16.12	15.94
	h2-4	15.72	16.07	15.93
	h2-5	15.65	15.85	15.95
h1-h2	∆h1	2.61	2.93	2.96
	∆h2	2.53	2.75	2.76
	∆h3	2.53	2.65	3.18
	∆h4	2.51	2.77	3.04
	∆h5	2.57	2.91	2.98
Strain-in-compression(%)	E1	13.05	14.65	14.8
	E2	12.65	13.75	13.8
	E3	12.65	13.25	15.9
	E4	12.55	13.85	15.2
	E5	12.85	14.55	14.9

## Sheet: Mobility(mm)
		Concentration of chlorogenic acid(mg/L)
		10	15	20
Mobility(mm)	M1	29.216	30.134	34.682
	M2	29.278	34.543	29.67
	M3	28.292	31.121	32.922
	M4	27.432	32.245	32.286
	M5	30.06	31.453	33.454

## Sheet: Initial setting time(min+sec)
		Concentration of chlorogenic acid(mg/L)
		10	15	20
Initial setting time(min+sec)	T1	3'10''	5'20''	6'50''
	T2	3'10''	5'10''	6'40''
	T3	3'20''	5'20''	6'40''
	T4	3'20''	5'20''	6'40''
	T5	3'10''	5'20''	6'50''
